# Supplementary material for: Natural variation in a CENTRORADIALIS homolog contributed to cluster fruiting and early maturity in cotton
Source: BMC Plant Biol. 2018 Nov 20;18:286. doi: 10.1186/s12870-018-1518-8 (PMC6245773; doi:10.1186/s12870-018-1518-8)
Supplement: Supplementary file 2 — Data S1. All primers used in this study. Data S2. The list of significant differentially expressed genes in Gh_VIGSvsGh_WT_Gb_VIGSvsGb_WT.venn. Data S3. 174 transcription factors in Gh_VIGSvsGh_WT_Gb_VIGSvsGb_WT.venn. Data S4. The 58 cultivars bred in Xinjiang Province. Data S5. The information of the expermental material of G. barbadense. (XLSX 167 kb) [file 12870_2018_1518_MOESM2_ESM.xlsx]

## Sheet: Supplementary Data 1
Supplementary Data 1: All primers used in this study.
Purpose	Primer names	Sequence(5'-3')
Fine mapping	SWU7188F	AGAGGTTTGACAATGGGAGC
Fine mapping	SWU7188R	TGAGAACCAGTTTGAGCCAG
Fine mapping	SWU7191F	TCACGTCCAACATTTTACGC
Fine mapping	SWU7191R	GCACAGGATAACGCACCTT
Fine mapping	SWU7197F	TAGGTCCCTCCCTTTCAATG
Fine mapping	SWU7197R	GTTTGGTTTCCAAGACAAGG
Fine mapping	SWU7199F	TGTTTGAGAGCATTGGAACC
Fine mapping	SWU7199R	GTCTAATGGTCAGGCCCCTA
Fine mapping	SWU7219F	TTTGGAAAGGGATAGGGATG
Fine mapping	SWU7219R	GTGAGGTTGTAAGTTCTTTCCC
Fine mapping	SWU7232F	TTTCGTGGCTAGGATCTCAA
Fine mapping	SWU7232R	TTCCTGTTCCTGTTCAACCA
Fine mapping	SWU7238F	GGTGAGAATAGTTGCCTTGGA
Fine mapping	SWU7238R	ACCTTCTTCTACTCCCCCGT
Fine mapping	SWU7401F	AGGTGAATGGGTAGTCCGTT
Fine mapping	SWU7401R	TCGATTTGGCCTGTGTTAGA
Fine mapping	SWU7412F	TTGATTTATCCCCATCCTGC
Fine mapping	SWU7412R	TGAGAAAAGTAATGCGGGTG
Fine mapping	SWU7467F	TTTGCTTGTCAAAAGTGGGA
Fine mapping	SWU7467R	CAGGTTGGTTTCTTCACATTG
Fine mapping	SWU7469F	GAGGGTGATCTTGGTTTCTTTT
Fine mapping	SWU7469R	GGGCACACACCACTCTCTTA
Fine mapping	SWU7479F	GTACATGAGTGTTTTGCGCC
Fine mapping	SWU7479R	CAGTCAATAATTCTTCACCACG
Fine mapping	SWU7499F	GTTGTCACCTCATTTCACGG
Fine mapping	SWU7499R	TGGACGCACTTATGGAAAAA
Fine mapping	SWU7509F	CCTTTCTCTTCTCCTCCTTTTT
Fine mapping	SWU7509R	GGTATCTTTTGTAGGTACTTGGAGG
Fine mapping	SWU7510F	TGCATGAGGAAATGATATGC
Fine mapping	SWU7510R	AGCGATTGGATCATTATGGG
Fine mapping	SWU7516F	TGAAGATGAAGGACCGGAAC
Fine mapping	SWU7516R	CTTGTAGGAGGTTACCTAAACTTAGTC
Fine mapping	SWU7517F	TGATGCCTTACTTCAATGTGC
Fine mapping	SWU7517R	CCGTCGATAGTTGTTGTGCT
Fine mapping	SWU7518F	TCATGGGTGTAGCTTGTGGT
Fine mapping	SWU7518R	ACTGCCATGTCAGCAAAAAC
Fine mapping	SWU7535F	GTGTCTTCGGAGACTGACGA
Fine mapping	SWU7535R	TTTACATTTGGGGCACTTGA
Fine mapping	SWU7554F	CAGGTCCACCATAACCCAAT
Fine mapping	SWU7554R	TCAGAACCCATCTTGTCAAA
Fine mapping	SWU7570F	TTCGACCCGCTTATTAGAGT
Fine mapping	SWU7570R	CCAATTCGATTGGTAGGACC
Fine mapping	SWU7572F	CGCCTTAACGGTAGTCAATACA
Fine mapping	SWU7572R	GATGAATTTCGCCTCCTTGA
Fine mapping	SWU7573F	GAAAAGGTGCCTTCCACAAT
Fine mapping	SWU7573R	CAGGCCTGCAAACTTGAATA
Fine mapping	SWU7577F	GGGATATTCGTGACTTTGGC
Fine mapping	SWU7577F	GGGATATTCGTGACTTTGGC
Fine mapping	SWU7577R	GAGTTGAGAATTAGGTGGGGA
Fine mapping	SWU7577R	GAGTTGAGAATTAGGTGGGGA
Fine mapping	SWU7578F	GAGTGATTGGGGCATCTTTT
Fine mapping	SWU7578R	CTAATCCGCGACTTTTGGTT
Fine mapping	SWU7579F	CACGGTAGTTGCCAAATGAA
Fine mapping	SWU7579R	CATCACTTTTTCACCCATGC
Fine mapping	SWU7589F	TCACCGATTCCACAGCTAAG
Fine mapping	SWU7589R	AGAGATTGAACGCGTTAGCA
Fine mapping	SWU7592F	AGTACGTTTTCCGAATTGCC
Fine mapping	SWU7592R	CTTTTCACCCGCGTTTAACT
Fine mapping	SWU7593F	TATCTTTGGGTCGCAGAACA
Fine mapping	SWU7593R	TCCTGCACAAAATTAGCAGC
Fine mapping	SWU7596F	CTCGAACTTGGCGTTTTACA
Fine mapping	SWU7596R	CAAGGATCGCCATGAAAGTA
Fine mapping	SWU7602F	CGGTACCATCATTTCTCCCT
Fine mapping	SWU7602R	TCACCTTCTTTCAAAACCCC
Fine mapping	SWU7606F	CTTAATCCAATGGGTGTTGG
Fine mapping	SWU7606R	GGGAGTTGGTGTCATTTTTG
Fine mapping	SWU7607F	AATGGCATGAATCTATGGGC
Fine mapping	SWU7607R	ACTGAAAGACCTTGGGATGG
Fine mapping	SWU7611F	TTAAGGTTTTCATGGGGCTC
Fine mapping	SWU7611R	GCACTTTGTCCTGCTGAAAA
Fine mapping	SWU7612F	ACCGAATTTGCTTACTGCCT
Fine mapping	SWU7612R	AGTGGCAACATCTCAAATGG
Fine mapping	SWU7617F	TCTACAGTGGAAACCACCCA
Fine mapping	SWU7617R	TGGTGGAAGGTTACAAAGGA
Fine mapping	SWU7624F	TGGGACAACTTGGCTGATTA
Fine mapping	SWU7624R	GCGCATTTCCATCATGTTC
Fine mapping	SWU7628F	GAGGCTCCCTAGGCTTCTTT
Fine mapping	SWU7628R	TAGAGGACAAAGCCATTCCC
Fine mapping	SWU7631F	GAGGCTCCCTAGGCTTCTTT
Fine mapping	SWU7631R	TAGAGGACAAAGCCATTCCC
Fine mapping	SWU7632F	CCAGCATGCATCTGAAAAAC
Fine mapping	SWU7632R	TGATGAGAACATTTCAGCGG
Fine mapping	SWU7640F	CCGCGTTCTTTTTCCTACTT
Fine mapping	SWU7640R	TATCGGGGAAAGTTGGATTC
Fine mapping	SWU7646F	AAGGGACTGATGATCCCAAT
Fine mapping	SWU7646R	ATGAAGCATGGATGCAAGAG
Fine mapping	SWU7649F	GGCAGATTCTAGGTTCCGAT
Fine mapping	SWU7649R	CACCCACAATTAGCTAGAAGC
Fine mapping	SWU7659F	TCTCGATTCCCTTCCTTCAG
Fine mapping	SWU7659R	GAAACCATGAGAAAGCGACA
Fine mapping	SWU7666F	CCCCATTTATGAGAATGGCT
Fine mapping	SWU7666R	GGTCCATCCGTAGTGGAAAT
Fine mapping	SWU7668F	TTTCGAATAGAGGACGGACA
Fine mapping	SWU7668R	TTCATAGAAGGGCAAAAGGG
Fine mapping	SWU7670F	GCAAGGCTCTGCTAAAAACA
Fine mapping	SWU7670R	GTGGGTGAGCCCTGGTTAT
Fine mapping	SWU7679F	TATTGGAAAAAGGGGGAGTG
Fine mapping	SWU7679R	TCAATGGCAGAGAAAACGTC
Fine mapping	SWU7682F	TTTCGAATAGAGGACGGACA
Fine mapping	SWU7682R	TTCATAGAAGGGCAAAAGGG
Fine mapping	SWU7685F	AAACGGTGAGGAAGGAAAAG
Fine mapping	SWU7685R	AGCTGACGTTGCCTAACTTG
Fine mapping	SWU7687F	CCGTATTTCTCCCTCCAAGA
Fine mapping	SWU7687R	TGACATCCACAAAGATGGGT
Fine mapping	SWU7688F	GGGGACAACACTTTTGGAAT
Fine mapping	SWU7688R	ACCACATCACCCTCTCATCA
Fine mapping	SWU7689F	GTGGGAAAAATGGGGAAAGT
Fine mapping	SWU7689R	AGTCCTTGTGTGTGCAGAGC
Fine mapping	SWU7692F	CGCTAGTGGGGGAGATTAGA
Fine mapping	SWU7692R	CCTGTTCTTTTATCCTGGTTGC
Fine mapping	SWU7697F	TGCATGCACTCACTATACGTC
Fine mapping	SWU7697R	GCATGTAATTGAGAGGTAGCTG
Fine mapping	SWU7707F	TCGGGTTCTGGAATACATGA
Fine mapping	SWU7707R	CCCTAAACGGTGTCGTTTCT
Fine mapping	SWU7712F	CCTTGGCATTTCGTAGTTCA
Fine mapping	SWU7712R	GCACAACAGATGCCACATTT
Fine mapping	SWU7720F	TGCATGATGTTTCGTTCGAG
Fine mapping	SWU7720R	AGCGAATAAAGCACGACAGA
Fine mapping	SWU7721F	CCCAACACTTTCCTTTGAGA
Fine mapping	SWU7721R	GTTTGAGGACTTTTTCACCC
Fine mapping	SWU10216F	CTTTGGGTCAAGTTCCTTCC
Fine mapping	SWU10216R	TTGGGATAACACAGGTGTCTG
Fine mapping	SWU10266F	TGGGTATGGGCTAGATCAAT
Fine mapping	SWU10266R	ATTCGCCCCCTTAAGCTAT
Fine mapping	SWU10303F	TTCGACCCGCTTATTAGAGT
Fine mapping	SWU10303R	CCAATTCGATTGGTAGGACC
Fine mapping	SWU10316F	AAACGGTGAGGAAGGAAAAG
Fine mapping	SWU10316R	AGCTGACGTTGCCTAACTTG
Fine mapping	SWU10320F	TCTTTCAAACCTGACCATGC
Fine mapping	SWU10320R	TCCTTGAGTAGACCTTGAGTGG
Fine mapping	SWU10325F	GCCAAAGGCCTAGAATGGTA
Fine mapping	SWU10325R	TGACATTCTCATCCGCTAAC
Fine mapping	SWU10326F	CTGGGTGTGATGCAGAGAGT
Fine mapping	SWU10326R	CTTCGAGTTCATTCCCCAAT
Fine mapping	SWU10332F	CGGAGGTCCTTCATTTCTCT
Fine mapping	SWU10332R	TCTTGGGTCACCACCTGTTA
Fine mapping	SWU10339F	GGGGAGGGATTGAGAGAGTT
Fine mapping	SWU10339R	CCACTGATGCTAAGCTCCAA
Fine mapping	SWU10340F	TGACCATGGAGGATTGATTG
Fine mapping	SWU10340R	AGGGAGGAATGATTATGCAC
Fine mapping	SWU10341F	GGAAAGTCTGTCTGGTTGAGG
Fine mapping	SWU10341R	AAAAAGGAGTGGGAACATGG
Fine mapping	SWU10344F	TGGATGCTAGCTCTCTTTGC
Fine mapping	SWU10344R	AAGTTTGTCCCGAAACATGG
Fine mapping	SWU10349F	CATCCGAGGTTGGAAGAGAT
Fine mapping	SWU10349R	GTCCCCGGTACACTTCAACT
Genome clone	Full-length GoCEN DNA-F	GAATTCATGGCAAAACTGTCAGATCC(added ECORI restriction sites)
Genome clone	Full-length GoCEN DNA-R	CCCGGGTTAGCGTCTTCTAGCAGCTG(added SmaI restriction sites )
VIGS vector	VIGS of GOCEN-F	gcGAATTCGAAGGGAAATGGTGAACTACG(added ECORI restriction sites )
VIGS vector	VIGS of GOCEN-R	gcGGTACCTTAGCGTCTTCTAGCAGCTG(added KpnI restriction sites)
Situ hybridization	Prob-CEN-F	GAAGGGAAATGGTGAACTAC
Situ hybridization	Prob-CEN-R	TTAGCGTCTTCTAGCAGCTG
Subcellular localization	GoCEN-F	GAATTCATGGCAAAACTGTCAGATCC(added ECORI restriction sites)
Subcellular localization	GoCEN+LINKER-1R	accagaaccaccaccagaaccaccgcgtcttctagcagctgttt
Subcellular localization	LINKER+GFP-F	ggtggttctggtggtggttctggtatggtgagcaagggcgagga
Subcellular localization	GFP-R	gtcgactcaggacttgtacagctcgt(added SalI restriction sites)
RT-PCR	RT-GoCEN-F	AGGCAAACAGTGAGAAGCAT
RT-PCR	RT-GoCEN-R	TTAGCGTCTTCTAGCAGCTG
RT-PCR	A07G1615,D07G1814-F	CACTAACCAGCAGGCTCAA
RT-PCR	A07G1615,D07G1814-R	TTAGAGCATCCATCCAGGGA
RT-PCR	A09G2157,D09G2362-F	AGGAAGTTGGAGGAGTTGAG
RT-PCR	A09G2157,D09G2362-R	TGCAGCATTCATCTCATCCG
RT-PCR	A03G1085-F	GATGGAAGGCTACCAAGTAC
RT-PCR	A03G1085-R	ATCGTATCGGGCTGATATCC
RT-PCR	D11G0882-F	CCAAGGTTTATGGAGTAGTG
RT-PCR	D11G0882-R	ATCCGTGGATGAAGTTGGTC
RT-PCR	A07G0722-F	AACTCACCACCATCAACATCC
RT-PCR	A07G0722-R	GAGATTGAGCTCAGCTTCCT
RT-PCR	D04G1891-F	AGGAGCAAAACGCCATGCTA
RT-PCR	D04G1891-R	GGTATGTCCCACCGATATTC
RT-PCR	A13G0751,D13G0878-F	GCAGAGAAATCACAGGCATT
RT-PCR	A13G0751,D13G0878-R	CTAGCATGGTGTTTTGCTCC
RT-PCR	A01G1608-F	CTTACAAGGAGCTGATGGCC
RT-PCR	A01G1608-R	TGAGCTGCTTGTAGTCCTCC
RT-PCR	A02G0736,D02G0779-F	GATGCATGAATATTGCAGCCC
RT-PCR	A02G0736,D02G0779-R	AGATGTGATATCCTCCCCTTTCA
RT-PCR	CLA-F	CATTGTTGCCAATAGCTGGA
RT-PCR	CLA-R	GAAATTGCTGAAGCCGAAAG
RT-PCR	FT-F	caaacggtgtacgcaccag
RT-PCR	FT-R	ccactctccctctggcagt
RT-PCR	LFY-F	GACAACGGGGATGAATTCG
RT-PCR	LFY-R	ATCAAGAAATCCCGACACTG
RT-PCR	TFL1-L1-F	AGAGGTTGCAGGAGGTGACA
RT-PCR	TFL1-L1-R	CCCTATATTTGGCTTTGGGTTT
RT-PCR	TFL1-L2-F	TGAGATTCAAGGTGGTGATT
RT-PCR	TFL1-L2-R	TCCTATATCTGGCCTTGGGATC

## Sheet: Supplementary Data 2
Supplementary Data S2 The list ofsignificant differentially expressed genes in Gh_VIGSvsGh_WT_Gb_VIGSvsGb_WT.venn
Gene_id	readcount_Gh_VIGS	readcount_Gh_WT	log2FoldChange	pval	padj	readcount_Gb_VIGS	readcount_Gb_WT	log2FoldChange	pval	padj		log2FoldChange	log2FoldChange
Gh_A01G0342	126.184	30.8078	2.0342	7.8165e-09	7.8401e-08	32.0475	4.41994	2.8581	7.6508e-06	9.3645e-05		2.0342	2.8581
Gh_A01G0388	1104.3	316.333	1.8036	1.105e-70	1.6196e-68	540.422	229.307	1.2368	7.502e-24	4.6425e-22		1.8036	1.2368
Gh_A01G0389	718.791	59.4216	3.5965	1.278e-121	4.1793e-119	90.2848	41.3206	1.1276	0.0018146	0.012118		3.5965	1.1276
Gh_A01G0407	38.4071	2.28818	4.0691	4.8678e-09	5.0049e-08	31.2683	0	Inf	9.3547e-11	2.2662e-09		4.0691	Inf
Gh_A01G0509	671.708	103.245	2.7018	6.0066e-81	1.0788e-78	109.77	7.35838	3.899	1.285e-23	7.86e-22		2.7018	3.899
Gh_A01G0526	151.637	10.5031	3.8517	7.1179e-30	3.0367e-28	47.3504	21.1202	1.1648	0.0040631	0.023819		3.8517	1.1648
Gh_A01G0588	18.7697	0	Inf	1.5284e-06	1.1407e-05	13.334	0.979479	3.7669	0.0013703	0.0095186		Inf	3.7669
Gh_A01G0684	31.8613	85.7179	-1.4278	1.9134e-05	0.00011909	8.48905	29.911	-1.817	0.0017532	0.011755		-1.4278	-1.817
Gh_A01G0846	64.8662	17.9161	1.8562	3.1326e-06	2.2257e-05	0	18.0589	#NAME?	2.4551e-06	3.3184e-05		1.8562	#NAME?
Gh_A01G0998	27.1096	118.655	-2.1299	1.2787e-10	1.5507e-09	61.9417	165.714	-1.4197	2.6839e-10	6.1802e-09		-2.1299	-1.4197
Gh_A01G1193	42.37	141.725	-1.742	1.2979e-10	1.5726e-09	198.015	77.3542	1.3561	2.5861e-11	6.6036e-10		-1.742	1.3561
Gh_A01G1202	166.838	350.426	-1.0707	6.6269e-12	9.0315e-11	137.278	279.91	-1.0279	3.0904e-10	7.0689e-09		-1.0707	-1.0279
Gh_A01G1367	189.254	458.129	-1.2754	3.775e-14	6.2165e-13	227.969	504.112	-1.1449	9.1026e-20	4.495e-18		-1.2754	-1.1449
Gh_A01G1384	82.7095	243.201	-1.556	3.0854e-12	4.3344e-11	29.3559	85.3867	-1.5404	1.668e-06	2.3156e-05		-1.556	-1.5404
Gh_A01G1439	145.052	297.875	-1.0381	7.4155e-10	8.3147e-09	388.741	1016.66	-1.387	9.5211e-50	1.7166e-47		-1.0381	-1.387
Gh_A01G1564	728.373	270.523	1.4289	5.3702e-35	2.8551e-33	279.931	15.77	4.1498	5.7304e-61	1.3909e-58		1.4289	4.1498
Gh_A01G1608	101.873	0	Inf	5.1439e-33	2.5096e-31	111.442	0	Inf	7.4979e-37	8.2669e-35		Inf	Inf
Gh_A01G1722	89.6888	42.8559	1.0654	0.00046468	0.0022077	93.9892	45.558	1.0448	0.00023796	0.0020727		1.0654	1.0448
Gh_A01G1843	129.022	358.464	-1.4742	4.4947e-19	1.0617e-17	46.8158	241.159	-2.3649	1.8685e-28	1.4405e-26		-1.4742	-2.3649
Gh_A01G1900	111.16	17.4325	2.6728	2.9268e-15	5.2459e-14	93.6242	14.2885	2.712	3.2119e-14	1.0622e-12		2.6728	2.712
Gh_A01G2049	21.5891	49.9445	-1.21	0.0037886	0.014361	16.9216	135.867	-3.0053	4.1762e-22	2.3806e-20		-1.21	-3.0053
Gh_A02G0037	8.33987	0	Inf	0.0034228	0.013135	8.66972	0	Inf	0.0023839	0.015238		Inf	Inf
Gh_A02G0179	2221.26	725.136	1.6151	4.8072e-38	2.8607e-36	1114.38	472.719	1.2372	1.8102e-45	2.7388e-43		1.6151	1.2372
Gh_A02G0236	1461.46	5781	-1.9839	2.7303e-267	4.8535e-264	24.7518	112.261	-2.1812	1.1545e-12	3.3319e-11		-1.9839	-2.1812
Gh_A02G0353	14.3927	0.837412	4.1033	0.00073744	0.0033507	0	10.3214	#NAME?	0.00077603	0.0058149		4.1033	#NAME?
Gh_A02G0455	313.407	96.2211	1.7036	1.4496e-21	3.9992e-20	115.989	38.3471	1.5968	6.4677e-09	1.2672e-07		1.7036	1.5968
Gh_A02G0477	107.808	380.697	-1.8202	3.9101e-27	1.459e-25	98.4728	245.505	-1.318	4.8206e-13	1.4447e-11		-1.8202	-1.318
Gh_A02G0689	989.651	2272.68	-1.1994	5.4532e-64	6.8119e-62	848.045	2009.35	-1.2445	4.5877e-63	1.1982e-60		-1.1994	-1.2445
Gh_A02G0704	79.3972	26.3906	1.5891	0.00032246	0.0015877	59.6077	20.067	1.5707	4.451e-05	0.00046107		1.5891	1.5707
Gh_A02G0736	91.6799	0	Inf	9.87e-30	4.1546e-28	79.1005	0	Inf	2.9241e-26	2.035e-24		Inf	Inf
Gh_A02G1039	98.9945	33.3139	1.5712	1.6731e-06	1.2417e-05	81.9728	32.1507	1.3503	2.5828e-05	0.00028215		1.5712	1.3503
Gh_A02G1272	34.7989	79.048	-1.1837	0.00040479	0.0019514	99.9673	264.74	-1.405	3.0404e-15	1.0986e-13		-1.1837	-1.405
Gh_A02G1512	3.31231	20.6879	-2.6429	0.0014464	0.0061204	8.07118	78.5408	-3.2826	1.5089e-14	5.1385e-13		-2.6429	-3.2826
Gh_A02G1563	173.009	37.5071	2.2056	8.1732e-18	1.7729e-16	49.6844	18.7084	1.4091	0.00063295	0.0048648		2.2056	1.4091
Gh_A02G1617	35.1342	0.418706	6.3908	1.0331e-10	1.2657e-09	31.7464	1.9098	4.0551	8.3869e-08	1.413e-06		6.3908	4.0551
Gh_A02G1735	25.9267	140.209	-2.4351	4.3497e-16	8.3095e-15	6.9343	36.7182	-2.4047	2.1396e-05	0.00023831		-2.4351	-2.4047
Gh_A02G1800	1033.5	5657.23	-2.4526	0	0	626.513	2100.84	-1.7455	3.6228e-72	1.1964e-69		-2.4526	-1.7455
Gh_A02G1815	311.909	82.2325	1.9233	2.3086e-25	7.8378e-24	79.4016	36.7673	1.1107	0.00039179	0.0032053		1.9233	1.1107
Gh_A02G1818	49.4675	9.99012	2.3079	0.00013648	0.000727	90.0968	27.3271	1.7211	6.2469e-08	1.0727e-06		2.3079	1.7211
Gh_A02G1824	253.233	83.0699	1.6081	3.1488e-16	6.0758e-15	108.102	43.9782	1.2975	2.7167e-06	3.6355e-05		1.6081	1.2975
Gh_A03G0103	133.103	305.3	-1.1977	1.5756e-10	1.8908e-09	145.823	412.297	-1.4995	7.1951e-25	4.6582e-23		-1.1977	-1.4995
Gh_A03G0108	109.701	251.309	-1.1959	2.1371e-10	2.5287e-09	1.01642	64.119	-5.9792	1.2352e-18	5.7022e-17		-1.1959	-5.9792
Gh_A03G0120	112.599	336.426	-1.5791	1.6626e-19	4.043e-18	80.5385	198.82	-1.3037	8.4608e-11	2.0624e-09		-1.5791	-1.3037
Gh_A03G0263	409.444	943.097	-1.2037	1.7016e-32	8.1698e-31	137.925	394.814	-1.5173	4.2762e-24	2.68e-22		-1.2037	-1.5173
Gh_A03G0410	669.185	207.993	1.6859	3.7678e-41	2.4643e-39	234.904	94.9848	1.3063	1.8893e-12	5.3339e-11		1.6859	1.3063
Gh_A03G0503	1981.63	5021.39	-1.3414	1.3604e-128	4.7394e-126	1935.28	4155.32	-1.1024	2.6451e-107	1.6518e-104		-1.3414	-1.1024
Gh_A03G0829	106.211	29.1329	1.8662	1.3602e-09	1.4862e-08	98.533	10.7743	3.193	1.5628e-17	6.7092e-16		1.8662	3.193
Gh_A03G0887	445.802	111.525	1.999	4.4364e-37	2.5566e-35	211.168	35.4929	2.5728	6.1419e-28	4.6412e-26		1.999	2.5728
Gh_A03G0958	905.147	3.06071	8.2081	3.3826e-259	5.8627e-256	288.356	3.3913	6.4099	3.0858e-83	1.2617e-80		8.2081	6.4099
Gh_A03G1058	753.314	222.335	1.7605	4.7868e-49	3.9935e-47	169.389	65.123	1.3791	4.4831e-07	6.8265e-06		1.7605	1.3791
Gh_A03G1085	103.371	1.38588	6.2209	1.5151e-29	6.3313e-28	59.2501	1.00406	5.8829	1.8613e-17	7.9362e-16		6.2209	5.8829
Gh_A03G1162	1073.03	283.845	1.9185	2.2575e-75	3.6061e-73	534.203	234.475	1.188	2.9318e-22	1.6788e-20		1.9185	1.188
Gh_A03G1171	128.273	55.4586	1.2097	2.8702e-06	2.0529e-05	140.557	64.2173	1.1301	1.1157e-06	1.5957e-05		1.2097	1.1301
Gh_A03G1323	576.046	173.576	1.7306	2.1274e-37	1.2342e-35	179.128	69.8975	1.3577	2.8357e-10	6.5102e-09		1.7306	1.3577
Gh_A03G1598	64.255	208.33	-1.697	2.319e-14	3.8853e-13	48.1296	122.238	-1.3447	2.1872e-07	3.4617e-06		-1.697	-1.3447
Gh_A03G1620	98.6004	2.15841	5.5136	2.4097e-26	8.576e-25	66.2483	22.4788	1.5593	2.2152e-05	0.00024566		5.5136	1.5593
Gh_A03G1682	180.481	58.2598	1.6313	8.4056e-10	9.3704e-09	101.281	49.0231	1.0468	0.00012044	0.0011325		1.6313	1.0468
Gh_A03G1731	67.6856	177.899	-1.3941	9.2065e-10	1.0224e-08	74.0183	180.737	-1.2879	1.0659e-09	2.2837e-08		-1.3941	-1.2879
Gh_A03G1779	10.2722	46.0525	-2.1645	0.0013164	0.0056233	1.07665	12.2066	-3.503	0.0029037	0.017995		-2.1645	-3.503
Gh_A03G1880	104.85	265.587	-1.3409	6.2339e-13	9.2902e-12	1.97263	19.5158	-3.3065	0.00022416	0.0019677		-1.3409	-3.3065
Gh_A03G2186	234.878	73.7346	1.6715	5.8938e-16	1.1137e-14	109.288	51.7895	1.0774	3.958e-05	0.00041508		1.6715	1.0774
Gh_A04G0110	8937.73	3883.22	1.2027	6.5502e-40	4.132e-38	2261.84	702.679	1.6866	1.4799e-135	1.4949e-132		1.2027	1.6866
Gh_A04G0201	9.93692	66.9938	-2.7532	1.3023e-09	1.4261e-08	23.615	52.3652	-1.1489	0.00343	0.020692		-2.7532	-1.1489
Gh_A04G0624	177.13	416.464	-1.2334	1.1407e-16	2.2706e-15	92.4344	189.517	-1.0358	1.8672e-07	2.9855e-06		-1.2334	-1.0358
Gh_A04G0863	1683.96	670.209	1.3292	1.2533e-61	1.4878e-59	749.806	247.173	1.601	1.6447e-47	2.7758e-45		1.3292	1.601
Gh_A04G0994	47.7329	101.346	-1.0862	0.00020353	0.0010449	18.3559	48.5211	-1.4024	0.00079377	0.0059265		-1.0862	-1.4024
Gh_A04G1054	611.061	298.742	1.0324	6.6072e-18	1.4418e-16	2837.26	574.087	2.3052	1.4528e-111	9.6885e-109		1.0324	2.3052
Gh_A04G1264	138.782	0.902294	7.265	5.8547e-25	1.9402e-23	299.661	6.3789	5.5539	2.0538e-80	8.0613e-78		7.265	5.5539
Gh_A04G1265	170.032	69.2465	1.296	1.5414e-08	1.4931e-07	407.221	39.632	3.3611	7.1651e-71	2.3216e-68		1.296	3.3611
Gh_A04G1303	838.744	256.859	1.7073	6.2952e-52	5.6314e-50	613.68	201.334	1.6079	2.5482e-25	1.683e-23		1.7073	1.6079
Gh_A04G1463	279.397	611.094	-1.1291	1.7109e-20	4.4127e-19	182.053	779.36	-2.0979	6.2145e-72	2.0425e-69		-1.1291	-2.0979
Gh_A04G1491	109.286	0	Inf	1.1016e-19	2.7102e-18	118.267	0.979479	6.9158	1.0312e-32	9.5465e-31		Inf	6.9158
Gh_A05G0191	163.9	32.2231	2.3467	1.8866e-18	4.2561e-17	90.345	41.1381	1.135	0.00012494	0.0011705		2.3467	1.135
Gh_A05G0238	44.6176	6.54012	2.7702	5.0079e-07	3.9916e-06	18.4161	2.91386	2.66	0.0016239	0.01101		2.7702	2.66
Gh_A05G0337	113.526	261.978	-1.2064	5.6841e-11	7.1196e-10	235.988	502.251	-1.0897	2.049e-18	9.2962e-17		-1.2064	-1.0897
Gh_A05G0415	932.494	4117.93	-2.1428	5.5786e-244	8.0573e-241	1463.11	730.789	1.0015	6.3843e-41	8.1362e-39		-2.1428	1.0015
Gh_A05G0508	543.732	109.98	2.3057	2.4171e-54	2.3307e-52	281.354	120.806	1.2197	3.1157e-13	9.4951e-12		2.3057	1.2197
Gh_A05G0586	593.416	196.323	1.5958	7.8087e-35	4.1199e-33	548.791	224.901	1.287	7.9873e-26	5.4429e-24		1.5958	1.287
Gh_A05G0675	32.8472	105.663	-1.6856	6.3162e-08	5.6699e-07	13.6314	79.7906	-2.5493	3.0037e-11	7.6443e-10		-1.6856	-2.5493
Gh_A05G0771	12.1451	54.0373	-2.1536	3.4048e-06	2.4045e-05	37.7847	100.605	-1.4128	1.2844e-06	1.8153e-05		-2.1536	-1.4128
Gh_A05G0825	88.21	37.9258	1.2178	0.00010746	0.00058335	38.5639	13.2844	1.5375	0.0013629	0.0094776		1.2178	1.5375
Gh_A05G1082	36.3566	73.245	-1.0105	0.0028095	0.011043	31.1478	71.1474	-1.1917	0.00042916	0.0034709		-1.0105	-1.1917
Gh_A05G1189	66.0684	13.7585	2.2636	1.4651e-05	9.3123e-05	113.298	26.4213	2.1003	2.4296e-12	6.7979e-11		2.2636	2.1003
Gh_A05G1334	102.484	38.8281	1.4002	2.7174e-06	1.9498e-05	76.4691	17.2515	2.1482	4.898e-09	9.7463e-08		1.4002	2.1482
Gh_A05G1414	13.1704	37.796	-1.5209	0.0028305	0.011113	17.042	50.1851	-1.5582	0.001066	0.0076538		-1.5209	-1.5582
Gh_A05G1642	31.9007	117.357	-1.8792	4.8634e-10	5.5483e-09	27.677	125.752	-2.1838	8.6059e-14	2.7533e-12		-1.8792	-2.1838
Gh_A05G1684	2038.84	572.502	1.8324	6.0207e-119	1.8802e-116	668.127	235.036	1.5072	5.3259e-39	6.3399e-37		1.8324	1.5072
Gh_A05G1742	28.8249	5.70271	2.3376	0.00037868	0.0018366	21.104	5.37484	1.9732	0.0048936	0.027773		2.3376	1.9732
Gh_A05G1745	43.3165	15.4982	1.4828	0.0015613	0.0065526	319.873	68.2685	2.2282	3.7261e-34	3.6564e-32		1.4828	2.2282
Gh_A05G1768	108.064	354.277	-1.713	1.6725e-22	4.876e-21	152.882	314.767	-1.0419	1.6906e-11	4.3873e-10		-1.713	-1.0419
Gh_A05G1797	565.184	131.44	2.1043	2.2416e-26	7.9942e-25	116.528	14.7659	2.9803	3.9458e-19	1.8783e-17		2.1043	2.9803
Gh_A05G1855	636.732	68.5449	3.2156	4.2463e-96	9.6838e-94	91.4782	14.3131	2.6761	1.3685e-13	4.3021e-12		3.2156	2.6761
Gh_A05G1879	1236.66	362.291	1.7712	3.8992e-76	6.4057e-74	358.971	115.357	1.6378	6.3574e-25	4.1314e-23		1.7712	1.6378
Gh_A05G2032	1012.58	317.342	1.6739	5.3322e-59	5.7851e-57	49.0256	19.1121	1.359	0.00098452	0.0071472		1.6739	1.359
Gh_A05G2033	963.903	322.166	1.5811	1.0903e-51	9.7029e-50	192.997	91.5444	1.076	5.7671e-08	9.9483e-07		1.5811	1.076
Gh_A05G2038	823.009	128.249	2.682	2.7011e-44	1.9466e-42	327.639	23.6058	3.7949	2.2687e-65	6.2836e-63		2.682	3.7949
Gh_A05G2069	165.261	19.1074	3.1125	4.5849e-26	1.607e-24	96.0823	23.9358	2.0051	5.3935e-10	1.1994e-08		3.1125	2.0051
Gh_A05G2100	30.3431	2.15841	3.8133	7.9424e-07	6.1523e-06	0	78.4074	#NAME?	1.2947e-25	8.7017e-24		3.8133	#NAME?
Gh_A05G2112	1963.51	388.563	2.3372	9.0036e-166	4.8388e-163	648.209	275.869	1.2325	9.2355e-28	6.9181e-26		2.3372	1.2325
Gh_A05G2113	132.749	400.152	-1.5919	1.3385e-23	4.1371e-22	131.349	315.564	-1.2645	5.1231e-15	1.8177e-13		-1.5919	-1.2645
Gh_A05G2131	135.982	19.6558	2.7904	2.8851e-19	6.8876e-18	79.2172	29.0298	1.4483	8.2828e-06	0.00010064		2.7904	1.4483
Gh_A05G2137	1763.39	617.381	1.5141	1.7565e-79	3.0368e-77	1257.7	410.735	1.6145	1.1118e-76	4.0839e-74		1.5141	1.6145
Gh_A05G2210	155.087	4.44659	5.1242	5.4068e-39	3.3055e-37	258.112	54.8508	2.2344	3.735e-28	2.8475e-26		5.1242	2.2344
Gh_A05G2255	625.868	185.094	1.7576	6.36e-22	1.7924e-20	709.247	48.5702	3.8681	2.3366e-70	7.3963e-68		1.7576	3.8681
Gh_A05G2377	24.8226	62.1579	-1.3243	0.00053642	0.0025122	20.6296	88.6059	-2.1027	4.8477e-10	1.0829e-08		-1.3243	-2.1027
Gh_A05G2421	117.883	452.703	-1.9412	8.316e-35	4.3776e-33	164.002	426.586	-1.3791	9.0793e-23	5.3259e-21		-1.9412	-1.3791
Gh_A05G2440	683.735	150.453	2.1841	9.0968e-62	1.0892e-59	402.911	74.3175	2.4387	5.1415e-48	8.7854e-46		2.1841	2.4387
Gh_A05G2500	16454.9	6522.11	1.3351	2.9679e-213	3.0259e-210	1035.41	20.5445	5.6553	6.6331e-268	2.6802e-264		1.3351	5.6553
Gh_A05G2724	15.221	147.558	-3.2771	2.4151e-23	7.3566e-22	282.254	994.181	-1.8165	4.4538e-73	1.5071e-70		-3.2771	-1.8165
Gh_A05G2986	109.76	8.95806	3.615	6.2718e-21	1.6564e-19	57.5147	7.78667	2.8849	9.7936e-10	2.1102e-08		3.615	2.8849
Gh_A05G3021	53.6869	187.129	-1.8014	2.9568e-14	4.9182e-13	9.80291	160.389	-4.0322	4.84e-34	4.7291e-32		-1.8014	-4.0322
Gh_A05G3108	91.6405	203.906	-1.1538	1.8844e-08	1.8072e-07	151.15	418.283	-1.4685	2.8867e-21	1.5626e-19		-1.1538	-1.4685
Gh_A05G3257	86.3757	5.05994	4.0934	3.2875e-05	0.00019618	92.7884	1.45693	5.9929	5.5713e-27	4.0073e-25		4.0934	5.9929
Gh_A05G3493	79.0024	279.735	-1.8241	8.1533e-21	2.1435e-19	15.1259	61.2543	-2.0178	7.6943e-07	1.1284e-05		-1.8241	-2.0178
Gh_A05G3657	37.796	171.566	-2.1825	1.0107e-16	2.0227e-15	7.53285	25.5893	-1.7643	0.0048495	0.027585		-2.1825	-1.7643
Gh_A05G3687	42.0347	131.794	-1.6486	1.9391e-09	2.082e-08	48.7245	111.576	-1.1953	0.0016798	0.011332		-1.6486	-1.1953
Gh_A05G3751	28.9238	97.9547	-1.7599	2.0081e-07	1.6945e-06	209.493	71.2703	1.5555	1.7479e-14	5.9114e-13		-1.7599	1.5555
Gh_A05G3754	479.004	169.602	1.4979	2.6141e-17	5.4522e-16	461.754	215.84	1.0972	3.8494e-17	1.6015e-15		1.4979	1.0972
Gh_A05G3761	16.8575	75.9164	-2.171	3.512e-08	3.2568e-07	18.6533	44.6277	-1.2585	0.0036314	0.021694		-2.171	-1.2585
Gh_A05G3881	396.59	916.683	-1.2088	1.0119e-31	4.6613e-30	1408.13	2860.48	-1.0225	1.061e-71	3.4706e-69		-1.2088	-1.0225
Gh_A05G3929	2438	226.122	3.4305	0	0	478.063	71.4036	2.7431	1.8595e-65	5.1711e-63		3.4305	2.7431
Gh_A05G4022	107.354	274.84	-1.3562	2.049e-13	3.1858e-12	66.0037	133.135	-1.0123	2.2022e-05	0.00024434		-1.3562	-1.0123
Gh_A06G0044	2284.7	448.794	2.3479	3.8949e-190	2.935e-187	695.4	79.9381	3.1209	1.1725e-108	7.5982e-106		2.3479	3.1209
Gh_A06G0045	39.0577	82.787	-1.0838	0.00084001	0.0037703	5.80112	25.491	-2.1356	0.0008715	0.0064272		-1.0838	-2.1356
Gh_A06G0170	385.825	184.51	1.0642	8.9315e-13	1.3127e-11	290.513	118.039	1.2993	8.8887e-15	3.0806e-13		1.0642	1.2993
Gh_A06G0188	2463.87	1181.31	1.0605	1.7967e-07	1.5261e-06	1863.86	771.113	1.2733	1.9e-06	2.6129e-05		1.0605	1.2733
Gh_A06G0259	75.0395	31.5803	1.2486	0.00023299	0.0011809	109.349	31.8453	1.7798	8.8255e-10	1.9148e-08		1.2486	1.7798
Gh_A06G0361	293.85	738.359	-1.3292	1.0003e-27	3.8442e-26	99.0713	260.555	-1.3951	6.8235e-10	1.4994e-08		-1.3292	-1.3951
Gh_A06G0410	158.794	414.176	-1.3831	9.2163e-20	2.2763e-18	66.365	135.842	-1.0334	1.1792e-05	0.00013898		-1.3831	-1.0334
Gh_A06G0520	174.586	513.982	-1.5578	4.2701e-22	1.2163e-20	50.2227	337.674	-2.7492	7.4953e-47	1.2288e-44		-1.5578	-2.7492
Gh_A06G0568	1.14351	32.5181	-4.8297	1.926e-05	0.00011974	3.46715	17.6306	-2.3463	0.0048362	0.027525		-4.8297	-2.3463
Gh_A06G0620	21.0568	118	-2.4864	2.6986e-14	4.4985e-13	39.9945	84.9934	-1.0875	0.00035637	0.0029585		-2.4864	-1.0875
Gh_A06G1151	59.3457	125.543	-1.081	3.3016e-05	0.00019692	70.9691	142.502	-1.0057	1.0893e-05	0.00012924		-1.081	-1.0057
Gh_A06G1215	55.2445	190.92	-1.7891	1.6239e-14	2.75e-13	139.661	310.884	-1.1545	4.4917e-13	1.3509e-11		-1.7891	-1.1545
Gh_A06G1256	763.665	301.419	1.3412	7.8995e-33	3.8378e-31	1201.78	548.813	1.1308	3.9244e-42	5.338e-40		1.3412	1.1308
Gh_A06G1257	306.112	110.557	1.4693	6.7475e-17	1.3694e-15	717.404	339.879	1.0778	1.0636e-24	6.834e-23		1.4693	1.0778
Gh_A06G1287	241.267	583.848	-1.275	1.2375e-23	3.8335e-22	78.3212	231.487	-1.5635	1.2573e-15	4.6786e-14		-1.275	-1.5635
Gh_A06G1330	143.218	353.009	-1.3015	8.8161e-16	1.6413e-14	298.46	603.345	-1.0154	2.9491e-19	1.4166e-17		-1.3015	-1.0154
Gh_A06G1356	665.971	2562.22	-1.9439	3.4574e-151	1.5666e-148	830.634	1811.08	-1.1246	2.4151e-58	5.5482e-56		-1.9439	-1.1246
Gh_A06G1640	83.3593	199.761	-1.2609	1.3536e-07	1.1682e-06	20.6259	51.9369	-1.3323	0.00098575	0.0071546		-1.2609	-1.3323
Gh_A06G1787	96.9045	256.222	-1.4028	1.3223e-09	1.4469e-08	79.3979	169.72	-1.096	2.8371e-07	4.4311e-06		-1.4028	-1.096
Gh_A06G1944	1827	553.117	1.7238	7.0264e-100	1.6682e-97	1062.91	365.454	1.5403	3.5904e-61	8.7767e-59		1.7238	1.5403
Gh_A06G1961	50.6705	105.15	-1.0532	0.00021954	0.001119	63.5567	405.406	-2.6733	6.8183e-54	1.3775e-51		-1.0532	-2.6733
Gh_A06G2068	177.031	46.7601	1.9207	1.8249e-15	3.332e-14	31.0913	9.79479	1.6664	0.0025416	0.016067		1.9207	1.6664
Gh_A07G0079	142.666	6.31606	4.4975	1.1553e-20	3.0146e-19	52.6132	1.00406	5.7115	2.0945e-15	7.6731e-14		4.4975	5.7115
Gh_A07G0084	2167.18	180.871	3.5828	6.58780017619418e-317	1.69159999997704e-313	258.88	28.7594	3.1702	3.1817e-43	4.4969e-41		3.5828	3.1702
Gh_A07G0152	168.85	360.351	-1.0937	1.3716e-10	1.6577e-09	132.489	345.268	-1.3818	1.1965e-14	4.1054e-13		-1.0937	-1.3818
Gh_A07G0218	121.944	42.3429	1.526	3.4805e-08	3.2293e-07	91.0604	38.5788	1.239	3.3237e-05	0.00035358		1.526	1.239
Gh_A07G0446	92.4881	476.039	-2.3637	6.932e-48	5.5367e-46	119.272	257.283	-1.1091	2.0094e-10	4.682e-09		-2.3637	-1.1091
Gh_A07G0470	3804.05	221.793	4.1002	0	0	1082.63	41.591	4.7021	1.3849e-246	5.2849e-243		4.1002	4.7021
Gh_A07G0697	89.5111	283.361	-1.6625	4.2728e-12	5.9304e-11	512.915	1118.68	-1.125	1.0139e-38	1.1946e-36		-1.6625	-1.125
Gh_A07G0722	185.45	39.1525	2.2439	1.4094e-19	3.4466e-18	108.4	18.1572	2.5777	4.2229e-15	1.51e-13		2.2439	2.5777
Gh_A07G0729	796.218	320.574	1.3125	2.714e-14	4.5219e-13	269.176	116.691	1.2059	1.7186e-10	4.0304e-09		1.3125	1.2059
Gh_A07G0741	1618.97	324.701	2.3179	2.2124e-140	9.1298e-138	2389.17	514.089	2.2164	7.9255e-213	1.7561e-209		2.3179	2.2164
Gh_A07G0869	730.306	115.01	2.6667	3.3533e-75	5.3199e-73	241.902	9.86853	4.6154	6.8046e-58	1.5325e-55		2.6667	4.6154
Gh_A07G1054	24.4085	66.3805	-1.4434	0.00012222	0.00065626	34.3778	69.8729	-1.0233	0.0018771	0.01246		-1.4434	-1.0233
Gh_A07G1158	398.562	167.697	1.2489	5.4597e-17	1.1152e-15	152.577	63.4695	1.2654	3.3429e-08	5.9487e-07		1.2489	1.2654
Gh_A07G1185	65.635	212.87	-1.6974	9.1076e-15	1.5777e-13	41.2555	86.4749	-1.0677	0.00028586	0.0024386		-1.6974	-1.0677
Gh_A07G1227	29.1208	134.271	-2.205	7.8202e-14	1.2553e-12	39.4636	142.453	-1.8519	5.9427e-13	1.7664e-11		-2.205	-1.8519
Gh_A07G1339	26.5773	0.418706	5.9881	4.9217e-08	4.4843e-07	47.1132	0.477449	6.6246	1.2068e-14	4.1385e-13		5.9881	6.6246
Gh_A07G1553	1214.26	404.823	1.5847	4.4644e-63	5.478e-61	295.482	145.135	1.0257	1.5159e-10	3.5855e-09		1.5847	1.0257
Gh_A07G1615	102.327	2.28818	5.4828	1.7306e-27	6.574e-26	105.768	6.90551	3.937	6.056e-23	3.5985e-21		5.4828	3.937
Gh_A07G1732	389.176	138.788	1.4875	2.1309e-21	5.7957e-20	110.018	50.9329	1.1111	0.0020471	0.013415		1.4875	1.1111
Gh_A07G1849	106.29	277.003	-1.3819	0.00025845	0.0012987	274.311	634.523	-1.2099	3.679e-08	6.5132e-07		-1.3819	-1.2099
Gh_A07G1868	22.9103	115.588	-2.3349	8.8269e-13	1.2979e-11	69.4069	289.743	-2.0616	4.1988e-20	2.1207e-18		-2.3349	-2.0616
Gh_A07G1875	14.3533	0.418706	5.0993	0.00022588	0.0011485	30.9708	1.95896	3.9828	1.5148e-07	2.4593e-06		5.0993	3.9828
Gh_A07G1951	18.1192	77.1431	-2.09	5.7855e-08	5.2192e-07	10.7628	38.6034	-1.8427	0.00022447	0.0019699		-2.09	-1.8427
Gh_A07G2049	181.152	476.258	-1.3945	4.8119e-08	4.3894e-07	78.7428	215.131	-1.45	2.967e-13	9.054e-12		-1.3945	-1.45
Gh_A07G2245	16.0686	0.967176	4.0543	0.00025073	0.0012629	39.2227	0.954898	5.3602	3.1984e-11	8.1219e-10		4.0543	5.3602
Gh_A07G2295	63.1115	11.889	2.4083	3.7095e-08	3.4299e-07	51.4161	19.1613	1.424	0.00042563	0.0034485		2.4083	1.424
Gh_A08G0091	555.916	140.145	1.988	4.0125e-45	2.9688e-43	71.5111	28.4295	1.3308	0.00010188	0.00097579		1.988	1.3308
Gh_A08G0345	710.588	219.77	1.693	3.0579e-44	2.1946e-42	58.4143	14.141	2.0464	1.0266e-06	1.4765e-05		1.693	2.0464
Gh_A08G0364	129.871	37.796	1.7808	1.9749e-05	0.00012252	91.2939	26.4951	1.7848	2.0529e-08	3.7593e-07		1.7808	1.7848
Gh_A08G0495	221.038	88.0944	1.3272	5.8003e-11	7.2598e-10	34.438	3.96707	3.1179	8.7456e-07	1.27e-05		1.3272	3.1179
Gh_A08G0595	1630.35	490.146	1.7339	8.6123e-92	1.8485e-89	896.227	324.021	1.4678	1.179e-48	2.0608e-46		1.7339	1.4678
Gh_A08G0600	149.389	62.8362	1.2494	2.1987e-07	1.8445e-06	98.0475	31.4662	1.6397	1.1391e-07	1.8818e-06		1.2494	1.6397
Gh_A08G0656	144.538	62.3526	1.2129	2.9014e-06	2.073e-05	32.2847	5.90145	2.4517	4.0926e-05	0.00042691		1.2129	2.4517
Gh_A08G0693	2034.37	424.897	2.2594	2.4809e-163	1.274e-160	970.554	302.196	1.6833	1.5798e-64	4.2892e-62		2.2594	1.6833
Gh_A08G0694	3493.26	724.907	2.2687	6.1033e-246	9.1984e-243	1268.58	595.597	1.0908	1.5178e-41	1.9858e-39		2.2687	1.0908
Gh_A08G0742	0	9.37676	#NAME?	0.0028038	0.011023	0	17.3252	#NAME?	0.0025532	0.016133		#NAME?	#NAME?
Gh_A08G0834	99.2116	216.804	-1.1278	1.7602e-08	1.693e-07	23.5584	59.2462	-1.3305	0.00033535	0.0028064		-1.1278	-1.3305
Gh_A08G0870	158.774	58.9735	1.4288	2.3839e-09	2.5414e-08	163.641	48.9493	1.7412	2.1232e-13	6.5696e-12		1.4288	1.7412
Gh_A08G0907	59.7003	6.38094	3.2259	8.6781e-11	1.07e-09	52.7902	1.50609	5.1314	1.1114e-14	3.8249e-13		3.2259	5.1314
Gh_A08G0909	123.581	17.9161	2.7861	1.3138e-17	2.8094e-16	55.6662	6.83177	3.0265	7.8672e-10	1.7183e-08		2.7861	3.0265
Gh_A08G0962	206.881	42.4078	2.2864	3.2046e-22	9.1767e-21	137.323	64.7193	1.0853	0.0023453	0.015032		2.2864	1.0853
Gh_A08G1033	158.202	383.109	-1.276	1.5403e-16	3.0346e-15	8.19162	193.375	-4.5611	1.1722e-28	9.1605e-27		-1.276	-4.5611
Gh_A08G1054	6.09226	27.9711	-2.1989	0.00089894	0.0040076	9.14782	52.109	-2.51	3.8307e-07	5.8813e-06		-2.1989	-2.51
Gh_A08G1070	79.4366	179.037	-1.1724	1.4497e-07	1.2459e-06	103.728	50.5538	1.0369	9.6349e-05	0.00092692		-1.1724	1.0369
Gh_A08G1075	17.705	103.498	-2.5474	4.4328e-13	6.6895e-12	32.2847	76.0448	-1.236	0.00016116	0.0014686		-2.5474	-1.236
Gh_A08G1148	20.6627	0	Inf	0.00028963	0.00144	16.0821	0	Inf	8.3663e-06	0.00010153		Inf	Inf
Gh_A08G1424	188.309	2.15841	6.447	3.7866e-53	3.5284e-51	30.2519	0.502029	5.9131	2.2942e-09	4.7581e-08		6.447	5.9131
Gh_A08G1425	374.449	124.994	1.5829	1.0808e-22	3.1858e-21	247.278	91.6181	1.4324	6.8269e-15	2.3987e-13		1.5829	1.4324
Gh_A08G1444	241.72	93.9035	1.3641	1.6274e-09	1.7632e-08	93.033	40.6606	1.1941	4.3818e-05	0.00045487		1.3641	1.1941
Gh_A08G1543	16.6009	0	Inf	7.695e-06	5.1286e-05	229.219	0.954898	7.9072	6.3321e-56	1.3635e-53		Inf	7.9072
Gh_A08G1769	65.6744	145.328	-1.1459	2.4657e-06	1.7831e-05	48.3705	208.516	-2.108	2.9652e-19	1.4226e-17		-1.1459	-2.108
Gh_A08G2176	264.295	671.117	-1.3444	5.5169e-29	2.2591e-27	166.98	338.91	-1.0212	1.17e-11	3.0803e-10		-1.3444	-1.0212
Gh_A08G2283	936.673	328.724	1.5107	2.3112e-47	1.8271e-45	744.585	235.931	1.6581	2.2875e-40	2.8585e-38		1.5107	1.6581
Gh_A08G2415	29.9684	75.3031	-1.3293	0.00010996	0.0005955	31.8705	147.729	-2.2127	8.19e-17	3.3308e-15		-1.3293	-2.2127
Gh_A08G2463	25.8873	856.689	-5.0485	1.8757e-181	1.2385e-178	421.493	1105.34	-1.3909	2.0297e-53	4.0766e-51		-5.0485	-1.3909
Gh_A09G0115	34.7595	8.31529	2.0636	0.00021478	0.0010964	15.7245	0	Inf	1.1722e-05	0.00013822		2.0636	Inf
Gh_A09G0385	31.4866	7.08859	2.1512	0.00040538	0.0019537	21.2245	4.87281	2.1229	0.0031224	0.01915		2.1512	2.1229
Gh_A09G0572	23.0285	5.15424	2.1596	0.0029585	0.011543	9.50548	0	Inf	0.001172	0.008318		2.1596	Inf
Gh_A09G0636	146.156	23.5539	2.6335	4.2693e-19	1.0088e-17	82.8085	18.0343	2.199	8.1203e-10	1.769e-08		2.6335	2.199
Gh_A09G0673	125.986	33.833	1.8968	5.1853e-11	6.5254e-10	44.8431	16.7495	1.4208	0.001178	0.0083521		1.8968	1.4208
Gh_A09G1036	276.479	127.866	1.1125	1.9008e-10	2.265e-09	103.495	51.4841	1.0074	0.00017441	0.001576		1.1125	1.0074
Gh_A09G1052	57.9063	238.489	-2.0421	6.2951e-21	1.6619e-19	76.1716	169.671	-1.1554	6.9577e-08	1.185e-06		-2.0421	-1.1554
Gh_A09G1070	33.5171	85.8771	-1.3574	2.7836e-05	0.00016825	5.08212	26.8496	-2.4014	0.00026538	0.0022817		-1.3574	-2.4014
Gh_A09G1128	31.526	135.049	-2.0989	4.4582e-13	6.7264e-12	15.3668	47.1625	-1.6178	0.00021692	0.0019111		-2.0989	-1.6178
Gh_A09G1132	59.8579	126.156	-1.0756	2.8768e-05	0.0001735	329.198	690.648	-1.069	5.5691e-11	1.379e-09		-1.0756	-1.069
Gh_A09G1340	121.155	3.60918	5.069	1.5829e-30	6.9457e-29	76.2282	1.45693	5.7093	8.0422e-22	4.5132e-20		5.069	5.7093
Gh_A09G1405	1061.5	2476.65	-1.2223	6.8188e-70	9.8898e-68	463.117	1758.58	-1.925	2.2422e-114	1.6741e-111		-1.2223	-1.925
Gh_A09G1505	540.932	171.271	1.6592	7.8259e-34	3.9545e-32	132.847	32.3965	2.0359	9.6015e-14	3.059e-12		1.6592	2.0359
Gh_A09G1575	1732.42	274.409	2.6584	1.5053e-180	9.7529e-178	444.028	80.7701	2.4588	1.6512e-20	8.5603e-19		2.6584	2.4588
Gh_A09G1592	9147.48	3047.7	1.5857	4.2363e-234	5.648e-231	2156.89	820.877	1.3937	3.0352e-83	1.2484e-80		1.5857	1.3937
Gh_A09G1681	739.591	180.895	2.0316	3.1485e-59	3.4648e-57	271.028	104.987	1.3682	8.1646e-15	2.8454e-13		2.0316	1.3682
Gh_A09G1704	14.9251	72.9915	-2.29	2.1439e-08	2.043e-07	50.3431	162.004	-1.6862	2.2898e-09	4.7504e-08		-2.29	-1.6862
Gh_A09G1924	139.709	310.607	-1.1527	9.2298e-12	1.2418e-10	222.172	447.365	-1.0098	1.0979e-14	3.7819e-13		-1.1527	-1.0098
Gh_A09G2051	48.0876	156.48	-1.7022	2.4336e-11	3.1559e-10	196.343	576.028	-1.5528	1.8135e-35	1.8789e-33		-1.7022	-1.5528
Gh_A09G2077	679.438	281.221	1.2726	1.4119e-27	5.3783e-26	199.931	38.7263	2.3681	4.6342e-24	2.8938e-22		1.2726	2.3681
Gh_A09G2157	36.1395	0.902294	5.3238	6.6027e-08	5.9156e-07	29.1752	0.502029	5.8608	4.8376e-09	9.6373e-08		5.3238	5.8608
Gh_A09G2206	620.821	103.599	2.5832	3.9693e-71	5.8926e-69	178.654	86.2924	1.0499	3.6213e-07	5.5772e-06		2.5832	1.0499
Gh_A09G2308	167.587	62.9659	1.4123	1.2691e-09	1.3914e-08	114.976	53.9205	1.0924	2.4335e-05	0.00026707		1.4123	1.0924
Gh_A09G2323	109.01	355.203	-1.7042	1.6647e-23	5.0999e-22	44.3614	316.077	-2.8329	2.0076e-45	3.0109e-43		-1.7042	-2.8329
Gh_A09G2408	57.8669	129.441	-1.1615	6.8797e-06	4.6252e-05	14.5876	142.955	-3.2927	2.5248e-25	1.6692e-23		-1.1615	-3.2927
Gh_A09G2418	656.704	235.003	1.4826	1.6616e-33	8.2697e-32	345.63	108.304	1.6741	6.2438e-25	4.0614e-23		1.4826	1.6741
Gh_A09G2428	167.449	536.221	-1.6791	2.2988e-33	1.1367e-31	464.247	1166.23	-1.3289	3.0835e-52	5.9833e-50		-1.6791	-1.3289
Gh_A09G2475	34586.9	1119.34	4.9495	0	0	2658.46	363.471	2.8707	0	0		4.9495	2.8707
Gh_A10G0549	28.7067	76.9191	-1.422	4.8376e-05	0.00028019	14.4672	39.13	-1.4355	0.0026766	0.016777		-1.422	-1.4355
Gh_A10G0580	16.9757	54.6506	-1.6868	0.00010288	0.00056039	11.1807	70.2662	-2.6518	4.2789e-09	8.5941e-08		-1.6868	-2.6518
Gh_A10G1391	55.7769	22.9761	1.2795	0.0012899	0.0055234	38.4435	14.2147	1.4354	0.0024491	0.015571		1.2795	1.4354
Gh_A10G1465	88686.9	18699.7	2.2457	7.3091e-226	8.5885e-223	6271.89	860.126	2.8663	0	0		2.2457	2.8663
Gh_A10G1479	54.1605	19.4318	1.4788	0.002571	0.010207	14.5876	0	Inf	2.5997e-05	0.00028363		1.4788	Inf
Gh_A10G1516	654.772	61.5446	3.4113	1.4986e-104	3.8337e-102	1311.93	168.421	2.9615	3.9878e-184	6.8481e-181		3.4113	2.9615
Gh_A10G1587	63.6632	23.4891	1.4385	0.00019658	0.0010125	129.741	33.4252	1.9566	9.4065e-13	2.7378e-11		1.4385	1.9566
Gh_A10G1660	573.384	185.542	1.6278	2.045e-34	1.062e-32	753.702	308.23	1.29	3.7084e-34	3.6442e-32		1.6278	1.29
Gh_A10G1746	534.13	149.551	1.8366	9.8477e-39	5.994e-37	294.763	98.0216	1.5884	6.2206e-20	3.1053e-18		1.8366	1.5884
Gh_A10G1753	976.541	364.615	1.4213	1.313e-44	9.6018e-43	303.117	115.126	1.3967	3.1107e-17	1.3085e-15		1.4213	1.3967
Gh_A10G1789	9.52279	40.2788	-2.0806	8.8595e-05	0.00048894	16.6807	56.3323	-1.7558	1.8415e-05	0.00020836		-2.0806	-1.7558
Gh_A10G1909	3.88406	24.6215	-2.6643	0.00046702	0.0022181	8.66972	43.0971	-2.3135	5.0774e-06	6.4527e-05		-2.6643	-2.3135
Gh_A10G2089	1001.01	2014.81	-1.0092	6.3203e-44	4.4941e-42	274.962	585.556	-1.0906	6.7039e-21	3.5505e-19		-1.0092	-1.0906
Gh_A10G2120	19.9526	0	Inf	6.6398e-07	5.2008e-06	50.5767	8.86447	2.5124	3.2553e-06	4.2902e-05		Inf	2.5124
Gh_A10G2140	49.8422	132.077	-1.4059	2.478e-06	1.7912e-05	49.0256	136.65	-1.4789	3.9301e-09	7.9307e-08		-1.4059	-1.4789
Gh_A10G2220	117.074	38.0261	1.6224	1.3097e-08	1.2794e-07	40.8377	9.69646	2.0744	4.6816e-05	0.0004822		1.6224	2.0744
Gh_A11G0080	139.59	282.182	-1.0154	3.1778e-09	3.3375e-08	131.83	298.506	-1.1791	4.4185e-13	1.33e-11		-1.0154	-1.1791
Gh_A11G0082	63.1903	191.9	-1.6026	2.6284e-12	3.7226e-11	125.194	704.028	-2.4915	3.0689e-41	3.955e-39		-1.6026	-2.4915
Gh_A11G0132	672.792	221.958	1.5999	1.4202e-38	8.6141e-37	349.112	68.5635	2.3482	8.1012e-40	9.9548e-38		1.5999	2.3482
Gh_A11G0430	5.55992	25.6829	-2.2077	0.0014245	0.0060392	13.0931	233.727	-4.1579	1.2759e-50	2.3496e-48		-2.2077	-4.1579
Gh_A11G0599	317.331	40.3143	2.9766	6.0065e-46	4.571e-44	66.0074	6.32974	3.3824	7.7505e-13	2.283e-11		2.9766	3.3824
Gh_A11G0609	194.006	12.0836	4.005	4.1976e-16	8.03e-15	68.6388	22.026	1.6398	6.5468e-06	8.1143e-05		4.005	1.6398
Gh_A11G0633	567.292	137.343	2.0463	4.915e-48	3.9347e-46	346.944	24.487	3.8246	1.2337e-69	3.8171e-67		2.0463	3.8246
Gh_A11G0650	408.322	823.275	-1.0117	5.709e-22	1.6142e-20	1026.02	2198.48	-1.0994	9.213e-66	2.5725e-63		-1.0117	-1.0994
Gh_A11G0754	43.8488	0.483588	6.5026	1.9638e-13	3.0581e-12	53.3322	4.37078	3.609	3.1363e-11	7.97e-10		6.5026	3.609
Gh_A11G0773	278.353	50.4281	2.4646	5.5481e-32	2.6006e-30	68.8158	8.88905	2.9526	9.3503e-12	2.4798e-10		2.4646	2.9526
Gh_A11G0792	303.47	696.182	-1.1979	9.5157e-19	2.1961e-17	286.327	596.685	-1.0593	1.9322e-20	9.9641e-19		-1.1979	-1.0593
Gh_A11G0891	187.343	18.3997	3.3479	6.3311e-32	2.9577e-30	25.1095	7.30922	1.7804	0.0042025	0.024509		3.3479	1.7804
Gh_A11G0903	96.9045	218.502	-1.173	3.2078e-09	3.3665e-08	96.0183	208.236	-1.1168	6.7656e-09	1.3217e-07		-1.173	-1.1168
Gh_A11G0904	67.6067	494.728	-2.8714	6.5673e-63	8.0299e-61	11.6588	74.1946	-2.6699	3.6413e-11	9.1923e-10		-2.8714	-2.6699
Gh_A11G0906	559.682	201.117	1.4766	1.8509e-29	7.7114e-28	237.953	62.49	1.929	1.3523e-21	7.467e-20		1.4766	1.929
Gh_A11G1024	664.965	36.5753	4.1843	7.5016e-132	2.7229e-129	83.7008	6.42806	3.7028	1.353e-17	5.8268e-16		4.1843	3.7028
Gh_A11G1113	110.095	8.47447	3.6995	1.7966e-21	4.9095e-20	39.3997	2.91386	3.7572	6.4761e-09	1.2684e-07		3.6995	3.7572
Gh_A11G1138	1393.1	211.774	2.7177	8.0361e-79	1.3689e-76	441.181	81.0018	2.4453	2.9006e-52	5.6442e-50		2.7177	2.4453
Gh_A11G1594	88.0323	186.893	-1.0861	2.6914e-07	2.2311e-06	46.4544	113.925	-1.2942	1.3345e-06	1.8815e-05		-1.0861	-1.2942
Gh_A11G1695	22.1609	113.524	-2.3569	6.4284e-13	9.5616e-12	27.323	80.6964	-1.5624	2.3497e-06	3.1834e-05		-2.3569	-1.5624
Gh_A11G1721	421.925	200.745	1.0716	7.0053e-14	1.1295e-12	108.276	40.5623	1.4165	3.6491e-07	5.615e-06		1.0716	1.4165
Gh_A11G1755	203.845	499.275	-1.2924	3.8176e-21	1.0215e-19	181.997	696.834	-1.9369	2.5413e-58	5.8187e-56		-1.2924	-1.9369
Gh_A11G1972	19.7556	50.2041	-1.3455	0.0018285	0.0075384	8.6095	39.2283	-2.1879	3.1365e-05	0.00033575		-1.3455	-2.1879
Gh_A11G1986	73.7384	701.282	-3.2495	3.5512e-100	8.4895e-98	70.3103	236.261	-1.7486	1.248e-18	5.7535e-17		-3.2495	-1.7486
Gh_A11G1993	218.751	9.79547	4.481	7.6548e-49	6.3404e-47	55.7792	26.4705	1.0753	0.0033762	0.020431		4.481	1.0753
Gh_A11G2030	11.4946	58.7434	-2.3535	3.1304e-07	2.5683e-06	10.5821	45.056	-2.0901	1.5157e-05	0.00017439		-2.3535	-2.0901
Gh_A11G2137	593.829	210.346	1.4973	8.2305e-26	2.8516e-24	148.812	56.0619	1.4084	3.1312e-09	6.3974e-08		1.4973	1.4084
Gh_A11G2168	860.768	211.679	2.0237	1.9599e-59	2.1775e-57	264.44	56.5148	2.2262	1.036e-28	8.1333e-27		2.0237	2.2262
Gh_A11G2523	70.9585	11.0222	2.6866	1.7766e-10	2.1221e-09	29.4763	7.35838	2.0021	0.00073137	0.0055237		2.6866	2.0021
Gh_A11G2765	60.3509	279.581	-2.2118	8.1e-27	2.9712e-25	78.7354	233.372	-1.5675	1.2278e-15	4.5787e-14		-2.2118	-1.5675
Gh_A11G2880	29.3572	122.482	-2.0608	9.5048e-12	1.2763e-10	30.4927	79.3132	-1.3791	2.096e-05	0.00023399		-2.0608	-1.3791
Gh_A11G2882	2787.13	418.027	2.7371	4.8612e-273	8.8688e-270	494.856	217.873	1.1835	8.8559e-21	4.6543e-19		2.7371	1.1835
Gh_A11G2885	18.8485	273.13	-3.8571	1.3697e-49	1.151e-47	25.4708	97.3721	-1.9347	9.5554e-10	2.0627e-08		-3.8571	-1.9347
Gh_A11G2919	48.2058	199.047	-2.0458	6.6995e-18	1.4615e-16	50.4034	105.661	-1.0678	6.1375e-05	0.0006151		-2.0458	-1.0678
Gh_A11G2926	617.213	276.125	1.1604	7.3359e-22	2.0616e-20	297.093	115.677	1.3608	4.3686e-16	1.684e-14		1.1604	1.3608
Gh_A11G2970	247.063	1294.86	-2.3898	2.3883e-117	7.1369e-115	319.331	765.889	-1.2621	1.67e-33	1.6089e-31		-2.3898	-1.2621
Gh_A11G2997	3667	1120.55	1.7104	3.2969e-163	1.6806e-160	519.035	215.102	1.2708	1.963e-12	5.5284e-11		1.7104	1.2708
Gh_A11G3024	199.271	550.157	-1.4651	1.0579e-27	4.0521e-26	872.68	3365.94	-1.9475	2.7606e-231	9.0297e-228		-1.4651	-1.9475
Gh_A11G3060	93.7305	19.7207	2.2488	1.1673e-10	1.4208e-09	61.8778	19.6142	1.6575	1.2978e-05	0.00015166		2.2488	1.6575
Gh_A11G3089	741.031	1869.78	-1.3353	1.0655e-65	1.4017e-63	239.451	1143.17	-2.2552	5.1292e-113	3.6322e-110		-1.3353	-2.2552
Gh_A12G0052	2119.24	958.713	1.1444	3.7389e-40	2.3737e-38	385.929	184.949	1.0612	4.4039e-14	1.4467e-12		1.1444	1.0612
Gh_A12G0118	504.891	109.82	2.2008	1.1082e-47	8.8306e-46	193.414	46.2076	2.0655	1.2312e-19	6.0407e-18		2.2008	2.0655
Gh_A12G0192	123.048	15.6634	2.9738	3.2769e-19	7.7962e-18	15.3668	2.46099	2.6425	0.0043681	0.025321		2.9738	2.6425
Gh_A12G0211	1406.71	465.943	1.5941	2.152e-71	3.2364e-69	434.13	215.496	1.0105	2.7763e-14	9.2396e-13		1.5941	1.0105
Gh_A12G0216	6.21048	45.3033	-2.8668	2.5518e-07	2.121e-06	111.445	710.024	-2.6715	5.1691e-91	2.5362e-88		-2.8668	-2.6715
Gh_A12G0570	28.6673	6.66988	2.1037	0.00088941	0.0039684	46.2811	1.00406	5.5265	2.6282e-07	4.1245e-06		2.1037	5.5265
Gh_A12G0584	86.3765	554.616	-2.6828	4.4555e-64	5.5857e-62	95.1187	1166.19	-3.6159	2.5652e-204	5.1824e-201		-2.6828	-3.6159
Gh_A12G0585	314.335	148.749	1.0794	3.1861e-11	4.0927e-10	180.084	41.6401	2.1126	7.9419e-19	3.7111e-17		1.0794	2.1126
Gh_A12G0907	16.4433	43.5696	-1.4058	0.0030984	0.012013	30.9106	63.3957	-1.0363	0.0026393	0.016591		-1.4058	-1.0363
Gh_A12G1057	57.7092	4.64123	3.6362	7.0466e-12	9.5827e-11	34.9763	0.502029	6.1225	8.1689e-11	1.9933e-09		3.6362	6.1225
Gh_A12G1143	2770.06	347.176	2.9962	7.2752e-308	1.6813e-304	1986	477.08	2.0576	4.4195e-163	5.9525e-160		2.9962	2.0576
Gh_A12G1240	95.8398	43.2807	1.1469	0.00056032	0.0026131	74.553	0	Inf	6.9721e-25	4.5181e-23		1.1469	Inf
Gh_A12G1342	602.052	45.1796	3.7361	2.1409e-101	5.1537e-99	37.6077	13.5898	1.4685	0.0026284	0.01653		3.7361	1.4685
Gh_A12G1505	287.186	78.9183	1.8636	7.9717e-23	2.3618e-21	203.104	11.8029	4.105	2.6944e-44	3.9378e-42		1.8636	4.105
Gh_A12G1619	120.506	41.6647	1.5322	0.00019438	0.0010022	124.173	29.8618	2.056	4.3739e-11	1.0929e-09		1.5322	2.056
Gh_A12G1685	972.164	234.036	2.0545	3.5924e-75	5.6861e-73	391.139	71.7336	2.447	1.0942e-46	1.7768e-44		2.0545	2.447
Gh_A12G1686	247.319	49.2369	2.3286	1.3931e-26	5.0223e-25	45.615	17.1286	1.4131	0.00096374	0.0070141		2.3286	1.4131
Gh_A12G1807	167.035	454.862	-1.4453	6.1862e-23	1.8438e-21	166.75	438.841	-1.396	1.0464e-23	6.4234e-22		-1.4453	-1.396
Gh_A12G1819	27.3661	5.57294	2.2959	0.00069221	0.0031632	66.1844	10.3706	2.674	3.0459e-10	6.9742e-09		2.2959	2.674
Gh_A12G1976	75.5719	28.3898	1.4125	4.5159e-05	0.00026333	24.6916	6.32974	1.9638	0.0023757	0.015194		1.4125	1.9638
Gh_A12G1982	253.392	99.7238	1.3454	1.6809e-12	2.4182e-11	146.964	70.7787	1.0541	3.998e-06	5.1894e-05		1.3454	1.0541
Gh_A12G2031	24.4085	3.67406	2.7319	0.00023547	0.0011919	10.4015	0.477449	4.4453	0.0049188	0.027889		2.7319	4.4453
Gh_A12G2066	77.4054	11.9893	2.6907	2.7091e-11	3.4956e-10	34.0803	8.2887	2.0397	0.00023279	0.0020315		2.6907	2.0397
Gh_A12G2219	339.965	843.049	-1.3102	1.6319e-33	8.1279e-32	197.25	430.434	-1.1258	1.3917e-11	3.6363e-10		-1.3102	-1.1258
Gh_A12G2300	153.49	377.725	-1.2992	1.2093e-16	2.3995e-15	48.2501	158.43	-1.7152	9.2006e-13	2.687e-11		-1.2992	-1.7152
Gh_A12G2329	97.2398	34.0276	1.5148	1.147e-06	8.6992e-06	57.7519	3.51421	4.0386	3.8988e-13	1.1819e-11		1.5148	4.0386
Gh_A12G2371	198.995	461.462	-1.2135	5.2212e-12	7.182e-11	135.475	278.526	-1.0398	3.8314e-10	8.6571e-09		-1.2135	-1.0398
Gh_A12G2501	10.4299	31.8044	-1.6085	0.0046873	0.017338	68.2811	29.4827	1.2116	0.00041061	0.0033395		-1.6085	1.2116
Gh_A12G2517	26.5379	141.53	-2.415	4.2534e-16	8.1325e-15	20.5657	70.7683	-1.7829	1.5974e-05	0.00018279		-2.415	-1.7829
Gh_A12G2566	268.967	131.511	1.0322	2.8888e-09	3.0493e-08	64.0311	24.0587	1.4122	8.9943e-05	0.00087139		1.0322	1.4122
Gh_A12G2714	3382.06	586.815	2.5269	1.9284e-91	4.1137e-89	932.581	313.286	1.5738	3.5092e-56	7.628e-54		2.5269	1.5738
Gh_A13G0040	141.483	4.02788	5.1345	1.1241e-35	6.1267e-34	19.2518	1.98354	3.2788	0.00021557	0.001901		5.1345	3.2788
Gh_A13G0196	64.2744	22.2978	1.5273	8.003e-05	0.00044479	65.8906	22.5034	1.5499	2.6242e-05	0.00028603		1.5273	1.5499
Gh_A13G0544	459.228	159.181	1.5285	1.3063e-25	4.4855e-24	404.225	20.4707	4.3035	1.8355e-89	8.6951e-87		1.5285	4.3035
Gh_A13G0613	17.0151	79.4252	-2.2228	2.0832e-07	1.7516e-06	0.538324	23.3846	-5.4409	4.1998e-07	6.4222e-06		-2.2228	-5.4409
Gh_A13G0693	434.208	165.344	1.3929	1.7462e-21	4.7755e-20	170.692	83.9894	1.0231	9.6656e-07	1.3936e-05		1.3929	1.0231
Gh_A13G0751	265.852	2.28818	6.8603	1.4737e-76	2.4384e-74	517.955	9.74562	5.7319	8.994e-139	9.5045e-136		6.8603	5.7319
Gh_A13G1003	482.157	112.297	2.1022	8.2572e-14	1.3218e-12	151.323	43.722	1.7912	4.6709e-13	1.4035e-11		2.1022	1.7912
Gh_A13G1045	354.693	169.271	1.0672	5.4189e-12	7.4407e-11	236.575	75.5428	1.6469	1.8933e-17	8.0626e-16		1.0672	1.6469
Gh_A13G1261	337.284	163.144	1.0478	4.1565e-11	5.2825e-10	223.128	100.591	1.1494	7.6106e-10	1.6652e-08		1.0478	1.1494
Gh_A13G1439	155.915	28.0066	2.4769	3.35e-19	7.9565e-18	101.94	13.7864	2.8864	2.5563e-16	1.0011e-14		2.4769	2.8864
Gh_A13G1604	106.881	527.076	-2.302	4.314e-18	9.5278e-17	62.0585	318.404	-2.3592	1.8944e-36	2.0655e-34		-2.302	-2.3592
Gh_A13G1995	91.9364	495.194	-2.4293	6.382e-51	5.5375e-49	135.489	303.259	-1.1624	3.0782e-12	8.5431e-11		-2.4293	-1.1624
Gh_A13G2148	26.5379	197.083	-2.8927	5.5322e-27	2.0455e-25	1.55475	29.5564	-4.2487	9.6561e-06	0.00011582		-2.8927	-4.2487
Gh_A13G2215	38.88	0.837412	5.5369	1.3465e-09	1.4726e-08	12.4945	1.43235	3.1248	0.0048186	0.027441		5.5369	3.1248
Gh_A13G2301	34.6413	130.496	-1.9134	5.562e-07	4.4109e-06	22.6588	104.253	-2.2019	5.5099e-12	1.4883e-10		-1.9134	-2.2019
Gh_D01G0168	142.666	44.8258	1.6702	1.7255e-07	1.4678e-06	58.7646	12.6841	2.2119	0.00267	0.016745		1.6702	2.2119
Gh_D01G0378	327.919	98.0317	1.742	1.4172e-23	4.3687e-22	22.0602	4.92197	2.1641	0.0019757	0.013009		1.742	2.1641
Gh_D01G0409	1481.71	732.456	1.0164	4.0556e-36	2.2458e-34	154.737	72.9834	1.0842	1.1706e-06	1.6665e-05		1.0164	1.0842
Gh_D01G0802	59.0892	9.37676	2.6557	1.2591e-08	1.2329e-07	111.155	28.9806	1.9394	5.0522e-05	0.00051719		2.6557	1.9394
Gh_D01G0854	42.7842	150.27	-1.8124	5.0493e-06	3.4663e-05	19.553	66.6045	-1.7682	2.0341e-06	2.7827e-05		-1.8124	-1.7682
Gh_D01G1030	345.998	75.1499	2.2029	5.8732e-34	2.9852e-32	97.0385	42.9496	1.1759	3.9861e-05	0.00041751		2.2029	1.1759
Gh_D01G1313	311.929	871.875	-1.4829	4.3573e-42	2.9357e-40	514.409	1262.76	-1.2956	5.7394e-35	5.8841e-33		-1.4829	-1.2956
Gh_D01G1624	14.2745	125.802	-3.1396	2.0094e-19	4.8438e-18	7.59307	25.8702	-1.7685	0.0040337	0.023673		-3.1396	-1.7685
Gh_D01G1644	306.783	1001.66	-1.7071	1.1919e-58	1.2851e-56	316.165	130.236	1.2796	1.9332e-15	7.1127e-14		-1.7071	1.2796
Gh_D01G1679	152.366	430.399	-1.4981	2.8181e-23	8.5616e-22	431.092	1194.59	-1.4704	6.3204e-56	1.3635e-53		-1.4981	-1.4704
Gh_D01G1815	1013.94	228.976	2.1467	4.9491e-85	9.4262e-83	300.915	26.4213	3.5096	1.3157e-55	2.7724e-53		2.1467	3.5096
Gh_D01G2085	48.9158	479.277	-3.2925	6.1127e-59	6.6216e-57	28.8778	84.7618	-1.5535	1.472e-06	2.0613e-05		-3.2925	-1.5535
Gh_D01G2086	107.512	238.181	-1.1476	4.9821e-05	0.00028797	13.5712	58.3896	-2.1052	7.1449e-07	1.0511e-05		-1.1476	-2.1052
Gh_D01G2160	30.8361	3.25535	3.2437	3.2987e-06	2.3355e-05	68.522	22.026	1.6374	1.8556e-05	0.00020974		3.2437	1.6374
Gh_D01G2335	835.866	364.721	1.1965	5.2251e-30	2.2486e-28	1279.64	613.227	1.0612	4.9397e-40	6.1357e-38		1.1965	1.0612
Gh_D01G2337	698.602	194.854	1.8421	3.4277e-49	2.8665e-47	868.234	160.634	2.4343	1.8153e-98	1.0056e-95		1.8421	2.4343
Gh_D02G0122	56.4668	14.6313	1.9483	5.9572e-06	4.0435e-05	71.929	26.948	1.4164	4.0619e-05	0.0004242		1.9483	1.4164
Gh_D02G0279	320.368	80.9175	1.9852	3.4449e-17	7.127e-16	29.1752	4.84823	2.5892	6.0104e-05	0.0006042		1.9852	2.5892
Gh_D02G0282	140.95	34.641	2.0246	2.2991e-13	3.5595e-12	21.5256	3.41588	2.6557	0.00060202	0.0046605		2.0246	2.6557
Gh_D02G0304	1860.37	5836.15	-1.6494	2.1274e-135	8.2857e-133	243.155	695.69	-1.5166	4.9188e-23	2.9406e-21		-1.6494	-1.5166
Gh_D02G0410	252.367	74.271	1.7646	1.7738e-18	4.0122e-17	41.7336	4.92197	3.0839	7.5261e-08	1.2746e-06		1.7646	3.0839
Gh_D02G0478	61.8096	364.42	-2.5597	1.4916e-41	9.9052e-40	66.1278	249.974	-1.9184	2.156e-22	1.2424e-20		-2.5597	-1.9184
Gh_D02G0481	47.4764	3.47941	3.7703	5.1612e-10	5.8755e-09	17.0383	2.88927	2.56	0.0029119	0.018033		3.7703	2.56
Gh_D02G0505	34.8777	3.60918	3.2726	8.1317e-07	6.2926e-06	80.1771	36.2653	1.1446	0.00024435	0.002123		3.2726	1.1446
Gh_D02G0544	589.02	224.129	1.394	2.3031e-28	9.1073e-27	141.354	38.2488	1.8858	0.0018692	0.012418		1.394	1.8858
Gh_D02G0698	18.888	3.60918	2.3877	0.0036709	0.013968	36.4708	8.83989	2.0446	0.00011863	0.0011185		2.3877	2.0446
Gh_D02G0724	352.761	748.898	-1.0861	5.2752e-22	1.4939e-20	294.206	143.285	1.0379	5.5127e-09	1.0869e-07		-1.0861	1.0379
Gh_D02G0770	58.2416	9.40618	2.6304	3.0677e-08	2.8697e-07	38.4435	12.0837	1.6697	0.0007429	0.0055985		2.6304	1.6697
Gh_D02G0775	51.3605	11.3111	2.1829	3.1376e-06	2.2282e-05	50.7008	22.4543	1.175	0.0031533	0.01931		2.1829	1.175
Gh_D02G0779	85.114	0	Inf	5.1748e-11	6.5146e-10	81.3742	0	Inf	5.9929e-27	4.3015e-25		Inf	Inf
Gh_D02G0839	298.168	148.684	1.0039	1.0922e-05	7.1052e-05	60.6881	27.3762	1.1485	0.0015867	0.010808		1.0039	1.1485
Gh_D02G0898	703.332	270.605	1.378	6.49e-23	1.9336e-21	677.324	145.746	2.2164	1.8115e-50	3.3181e-48		1.378	2.2164
Gh_D02G0923	15.1221	55.783	-1.8832	5.113e-05	0.00029485	0.478101	36.2653	-6.2451	5.072e-11	1.2605e-09		-1.8832	-6.2451
Gh_D02G0948	58.7345	239.768	-2.0294	6.591e-21	1.7381e-19	48.8486	20.0179	1.287	0.0018739	0.012443		-2.0294	1.287
Gh_D02G1069	52.3069	183.802	-1.8131	3.5434e-14	5.8463e-13	19.4325	47.3941	-1.2862	0.0018494	0.012312		-1.8131	-1.2862
Gh_D02G1130	101.735	28.9971	1.8108	1.6699e-08	1.6113e-07	98.887	6.40348	3.9489	1.0011e-21	5.5908e-20		1.8108	3.9489
Gh_D02G1252	301.578	124.729	1.2737	4.02e-13	6.0918e-12	124.418	61.7563	1.0105	3.3598e-05	0.00035708		1.2737	1.0105
Gh_D02G1270	373.719	47.2731	2.9829	1.9455e-53	1.8252e-51	135.666	46.1934	1.5543	4.5308e-06	5.8096e-05		2.9829	1.5543
Gh_D02G1311	78.2336	26.0013	1.5892	7.2431e-06	4.8507e-05	298.949	20.5936	3.8596	1.4789e-60	3.5518e-58		1.5892	3.8596
Gh_D02G1327	24.172	61.8984	-1.3566	0.000427	0.0020467	28.7008	64.6702	-1.172	0.00070436	0.0053396		-1.3566	-1.172
Gh_D02G1361	50.2169	22.0738	1.1858	0.0041681	0.015633	41.376	15.6962	1.3984	0.002281	0.014686		1.1858	1.3984
Gh_D02G1479	290.024	141.825	1.0321	6.7265e-10	7.5765e-09	163.524	59.8219	1.4508	1.9217e-10	4.4883e-09		1.0321	1.4508
Gh_D02G1502	64.8662	0	Inf	2.7043e-21	7.3066e-20	48.4234	0.477449	6.6642	1.0932e-08	2.076e-07		Inf	6.6642
Gh_D02G1504	83.34	38.7986	1.103	0.0004656	0.0022118	35.7519	12.6841	1.495	0.0025742	0.01624		1.103	1.495
Gh_D02G1677	62.5398	292.779	-2.227	3.2559e-28	1.2782e-26	58.4709	119.324	-1.0291	4.4958e-05	0.00046512		-2.227	-1.0291
Gh_D02G1772	46.6087	96.0558	-1.0433	0.00033763	0.0016552	50.1022	112.493	-1.1669	9.7789e-06	0.00011721		-1.0433	-1.1669
Gh_D02G2034	389.945	38.0555	3.3571	1.6077e-63	1.9904e-61	173.982	54.2504	1.6812	1.648e-13	5.1478e-12		3.3571	1.6812
Gh_D02G2102	212.619	33.1254	2.6823	9.2506e-28	3.5629e-26	175.601	76.6801	1.1954	1.883e-08	3.4648e-07		2.6823	1.1954
Gh_D02G2389	54.3969	211.089	-1.9563	8.5846e-18	1.8581e-16	63.3158	133.844	-1.0799	5.6881e-06	7.1481e-05		-1.9563	-1.0799
Gh_D02G2435	136.219	411.487	-1.5949	2.027e-24	6.5242e-23	134.646	306.798	-1.1881	1.3155e-13	4.1471e-12		-1.5949	-1.1881
Gh_D03G0085	234.326	97.0939	1.2711	4.2755e-11	5.4267e-10	136.559	64.9018	1.0732	6.0934e-06	7.6018e-05		1.2711	1.0732
Gh_D03G0105	25.7297	0.967176	4.7335	3.902e-07	3.1529e-06	53.7501	16.0999	1.7392	3.1853e-05	0.00034041		4.7335	1.7392
Gh_D03G0161	71.5696	35.4784	1.0124	0.0026356	0.010433	74.5567	24.3641	1.6136	3.4866e-06	4.5688e-05		1.0124	1.6136
Gh_D03G0185	490.656	174.844	1.4886	2.9403e-26	1.0432e-24	151.44	48.5948	1.6399	1.1557e-11	3.0439e-10		1.4886	1.6399
Gh_D03G0343	265.734	129.187	1.0405	3.3818e-09	3.5394e-08	506.112	159.788	1.6633	7.1625e-35	7.2996e-33		1.0405	1.6633
Gh_D03G0377	50.7493	192.796	-1.9256	5.396e-16	1.0227e-14	424.858	854.741	-1.0085	6.709e-26	4.6038e-24		-1.9256	-1.0085
Gh_D03G0483	8.14285	138.658	-4.0899	2.4461e-27	9.2315e-26	148.338	381.445	-1.3626	3.2967e-20	1.6737e-18		-4.0899	-1.3626
Gh_D03G0583	2114.61	4275.9	-1.0158	6.9962e-73	1.0684e-70	153.725	734.131	-2.2557	6.5781e-76	2.3781e-73		-1.0158	-2.2557
Gh_D03G0688	13.5451	59.3507	-2.1315	0.00016132	0.00084604	19.8504	49.6584	-1.3229	0.0041462	0.024228		-2.1315	-1.3229
Gh_D03G0808	339.965	94.0272	1.8542	4.2571e-26	1.4989e-24	99.075	48.4719	1.0314	0.00031092	0.0026272		1.8542	1.0314
Gh_D03G0810	261.515	69.9248	1.903	2.3901e-21	6.4778e-20	50.2792	17.1286	1.5536	0.00019467	0.0017362		1.903	1.5536
Gh_D03G1059	392.548	72.7614	2.4316	3.1105e-43	2.1804e-41	79.5147	18.1326	2.1326	2.7051e-09	5.565e-08		2.4316	2.1326
Gh_D03G1253	6.62461	41.1162	-2.6338	4.1871e-06	2.9126e-05	3.1095	19.6142	-2.6571	0.00097024	0.0070532		-2.6338	-2.6571
Gh_D03G1354	41.9165	10.2791	2.0278	7.5317e-05	0.00042055	72.7647	34.3063	1.0848	0.00088784	0.0065302		2.0278	1.0848
Gh_D03G1381	144.184	36.5105	1.9815	2.6905e-13	4.1422e-12	41.1953	12.1575	1.7606	0.0002732	0.0023434		1.9815	1.7606
Gh_D03G1517	21.3527	4.25194	2.3282	0.0026769	0.010582	27.146	7.30922	1.893	0.0021466	0.013966		2.3282	1.893
Gh_D03G1530	74.2314	249.316	-1.7479	1.3444e-17	2.8731e-16	113.836	419.508	-1.8817	5.8294e-35	5.9675e-33		-1.7479	-1.8817
Gh_D03G1640	106.586	28.6139	1.8972	1.147e-09	1.263e-08	114.307	0.502029	7.8309	1.5769e-18	7.2115e-17		1.8972	7.8309
Gh_D04G0114	125.513	413.551	-1.7202	3.1472e-27	1.1807e-25	38.865	78.3337	-1.0112	0.00095669	0.006971		-1.7202	-1.0112
Gh_D04G0242	128.648	59.2625	1.1182	1.0131e-05	6.6311e-05	124.9	46.0355	1.44	3.2689e-08	5.8232e-07		1.1182	1.44
Gh_D04G0351	21.0568	0.418706	5.6522	2.3286e-06	1.6913e-05	16.5037	0.502029	5.0389	0.00017218	0.0015586		5.6522	5.0389
Gh_D04G0442	16.3645	1.25612	3.7035	0.00083105	0.0037332	13.8121	0.477449	4.8544	0.00030104	0.0025529		3.7035	4.8544
Gh_D04G0473	77.5437	378.792	-2.2883	6.1917e-37	3.5418e-35	81.2574	180.456	-1.1511	2.1064e-08	3.8542e-07		-2.2883	-1.1511
Gh_D04G0532	100.355	246.845	-1.2985	2.6564e-09	2.8151e-08	120.951	292.235	-1.2727	1.8579e-06	2.559e-05		-1.2985	-1.2727
Gh_D04G0537	874.705	2052.49	-1.2305	5.2695e-18	1.1573e-16	514.658	1741.94	-1.759	7.8683e-115	6.0053e-112		-1.2305	-1.759
Gh_D04G0626	34.1484	213.454	-2.644	4.4798e-26	1.5733e-24	4.00548	36.2161	-3.1766	4.6626e-07	7.0763e-06		-2.644	-3.1766
Gh_D04G0777	64.3733	5.83247	3.4643	2.4115e-12	3.4294e-11	51.4763	7.35838	2.8064	1.2581e-08	2.3689e-07		3.4643	2.8064
Gh_D04G0824	32.8866	155.649	-2.2427	8.287e-13	1.2203e-11	2.09307	31.3433	-3.9045	1.6281e-07	2.6302e-06		-2.2427	-3.9045
Gh_D04G1038	18.3162	76.1111	-2.055	8.1518e-08	7.2112e-07	18.7135	57.6909	-1.6243	4.1921e-05	0.00043649		-2.055	-1.6243
Gh_D04G1060	149.586	449.029	-1.5858	3.6686e-26	1.2956e-24	217.154	526.798	-1.2785	1.5339e-24	9.7924e-23		-1.5858	-1.2785
Gh_D04G1090	897.043	3670.58	-2.0328	5.1915e-209	4.7357e-206	576.042	1600.51	-1.4743	3.6286e-49	6.4239e-47		-2.0328	-1.4743
Gh_D04G1230	257.315	77.2374	1.7362	1.8343e-18	4.1422e-17	131.416	34.8084	1.9166	1.6617e-12	4.7128e-11		1.7362	1.9166
Gh_D04G1363	1208.16	508.917	1.2473	9.2964e-41	6.0128e-39	683.508	290.231	1.2358	3.1356e-29	2.5251e-27		1.2473	1.2358
Gh_D04G1398	127.406	369.003	-1.5342	1.3919e-20	3.6114e-19	59.2501	169.769	-1.5187	2.1052e-11	5.4179e-10		-1.5342	-1.5187
Gh_D04G1432	628.569	185.996	1.7568	7.1579e-42	4.7992e-40	117.006	18.6347	2.6505	8.3807e-17	3.4034e-15		1.7568	2.6505
Gh_D04G1519	56.2698	26.5852	1.0817	0.0048812	0.017943	53.6898	25.5648	1.0705	0.0045094	0.025995		1.0817	1.0705
Gh_D04G1661	25.5126	60.3534	-1.2422	0.0011204	0.0048681	153.299	584.419	-1.9306	2.6979e-49	4.8135e-47		-1.2422	-1.9306
Gh_D04G1849	138.033	2.57712	5.7431	3.0922e-37	1.7872e-35	89.1443	0.502029	7.4722	4.9368e-28	3.7429e-26		5.7431	7.4722
Gh_D04G1891	188.348	0.837412	7.8132	8.4855e-57	8.7803e-55	481.307	12.8315	5.2292	1.9464e-97	1.0611e-94		7.8132	5.2292
Gh_D04G1947	1852.23	747.706	1.3087	2.0672e-64	2.6393e-62	1122.33	472.818	1.2471	2.2686e-46	3.5989e-44		1.3087	1.2471
Gh_D04G1957	126.794	1332.88	-3.394	2.5628e-44	1.8527e-42	394.061	836.52	-1.086	1.674e-28	1.292e-26		-3.394	-1.086
Gh_D05G0061	30.4219	3.19047	3.2533	4.4603e-06	3.0876e-05	18.7737	0.979479	4.2606	3.7458e-05	0.00039524		3.2533	4.2606
Gh_D05G0219	23.1073	303.872	-3.717	9.2051e-53	8.4976e-51	38.3796	142.049	-1.888	7.8538e-13	2.3124e-11		-3.717	-1.888
Gh_D05G0228	93.494	43.1864	1.1143	0.00063049	0.0029077	431.958	172.437	1.3248	7.1529e-22	4.024e-20		1.1143	1.3248
Gh_D05G0336	62.7368	15.5631	2.0112	1.3094e-06	9.851e-06	73.2428	12.7578	2.5213	2.2519e-10	5.2257e-09		2.0112	2.5213
Gh_D05G0451	2226.7	138.08	4.0113	0	0	179.851	27.4991	2.7093	3.627e-20	1.84e-18		4.0113	2.7093
Gh_D05G0463	1805.86	801.124	1.1726	1.7261e-52	1.5725e-50	926.882	458.441	1.0156	3.3422e-28	2.5565e-26		1.1726	1.0156
Gh_D05G0473	119.5	36.8937	1.6956	4.0399e-09	4.1859e-08	53.6296	8.66782	2.6293	3.1451e-08	5.6157e-07		1.6956	2.6293
Gh_D05G0627	487.579	69.0579	2.8198	2.8912e-40	1.844e-38	27.9216	6.95467	2.0053	0.00092638	0.0067781		2.8198	2.0053
Gh_D05G0820	34.2666	141.2	-2.0429	3.3044e-13	5.046e-12	18.7737	83.8419	-2.159	2.2425e-07	3.5428e-06		-2.0429	-2.159
Gh_D05G0905	654.99	279.44	1.2289	4.176e-25	1.3979e-23	184.861	54.4471	1.7635	2.6045e-15	9.4525e-14		1.2289	1.7635
Gh_D05G1007	86.2189	190.849	-1.1464	2.7091e-05	0.0001641	97.5694	351.057	-1.8472	1.2432e-28	9.6929e-27		-1.1464	-1.8472
Gh_D05G1347	910.235	114.556	2.9902	2.8812e-121	9.3777e-119	269.051	75.0161	1.8426	1.2083e-22	7.0698e-21		2.9902	1.8426
Gh_D05G1359	61.2974	18.6238	1.7187	2.4047e-05	0.00014702	14.6478	1.95896	2.9025	0.0030697	0.01887		1.7187	2.9025
Gh_D05G1367	159.189	9.37676	4.0855	4.7707e-22	1.3544e-20	128.54	26.5688	2.2744	2.1714e-15	7.942e-14		4.0855	2.2744
Gh_D05G1369	119.775	26.1665	2.1945	6.9629e-13	1.0319e-11	69.053	26.8988	1.3602	8.2019e-05	0.00080118		2.1945	1.3602
Gh_D05G1392	25.0196	3.32023	2.9137	0.00013556	0.00072243	0	17.1532	#NAME?	4.9491e-06	6.2978e-05		2.9137	#NAME?
Gh_D05G1430	139.058	21.2658	2.7091	6.4177e-19	1.5021e-17	47.6478	19.4912	1.2896	0.0017844	0.011938		2.7091	1.2896
Gh_D05G1458	122.634	45.1735	1.4408	1.9754e-07	1.6692e-06	102.418	50.81	1.0113	0.00019004	0.0017006		1.4408	1.0113
Gh_D05G1554	22.2003	3.06071	2.8586	0.00041107	0.0019772	25.2902	4.39536	2.5245	0.00025709	0.0022205		2.8586	2.5245
Gh_D05G1779	760.057	305.825	1.3134	1.8953e-20	4.872e-19	356.17	27.3271	3.7042	1.638e-45	2.4837e-43		1.3134	3.7042
Gh_D05G1963	244.105	58.6431	2.0575	3.6536e-22	1.0437e-20	40.3559	8.83989	2.1907	1.9321e-05	0.00021743		2.0575	2.1907
Gh_D05G1992	654.28	112.303	2.5425	2.0715e-73	3.1843e-71	108.58	12.7578	3.0893	1.7767e-18	8.1038e-17		2.5425	3.0893
Gh_D05G2052	581.132	72.8618	2.9956	3.7802e-81	6.8249e-79	97.272	23.0792	2.0754	1.019e-10	2.4569e-09		2.9956	2.0754
Gh_D05G2224	364.986	150.353	1.2795	2.6918e-12	3.8062e-11	521.419	248.773	1.0676	2.708e-18	1.2197e-16		1.2795	1.0676
Gh_D05G2281	583.775	95.5722	2.6107	5.4765e-68	7.6087e-66	206.387	46.4638	2.1512	6.8223e-22	3.8412e-20		2.6107	2.1512
Gh_D05G2285	409.603	158.603	1.3688	9.6089e-16	1.7869e-14	290.205	136.207	1.0913	1.7237e-11	4.4697e-10		1.3688	1.0913
Gh_D05G2356	59.6215	196.977	-1.7241	3.2592e-14	5.4017e-13	252.243	620.951	-1.2997	6.3077e-29	4.9974e-27		-1.7241	-1.2997
Gh_D05G2381	382.433	39.2173	3.2856	3.6964e-61	4.3215e-59	155.803	33.1302	2.2335	9.1862e-18	3.9937e-16		3.2856	2.2335
Gh_D05G2391	2128.43	1054.97	1.0126	3.9051e-47	3.0695e-45	1332.02	338.973	1.9744	1.7331e-108	1.1126e-105		1.0126	1.9744
Gh_D05G2452	91.7981	11.7947	2.9603	1.8226e-14	3.0788e-13	41.4964	14.0918	1.5581	0.0022031	0.014267		2.9603	1.5581
Gh_D05G2470	171.806	33.6089	2.3539	2.068e-19	4.9816e-18	367.761	74.135	2.3105	3.9752e-41	5.0944e-39		2.3539	2.3105
Gh_D05G2515	1650.06	401.697	2.0383	5.0141e-119	1.5729e-116	551.482	78.9095	2.805	4.4014e-77	1.6342e-74		2.0383	2.805
Gh_D05G2641	94.7751	288.303	-1.605	4.9039e-18	1.0796e-16	65.2282	139.244	-1.094	3.0399e-06	4.0233e-05		-1.605	-1.094
Gh_D05G2687	118.06	430.028	-1.8649	1.6642e-31	7.5803e-30	194.668	399.466	-1.0371	6.4538e-14	2.0823e-12		-1.8649	-1.0371
Gh_D05G2702	310.786	39.7952	2.9653	1.1446e-44	8.3795e-43	96.7902	0.477449	7.6634	2.1984e-18	9.9545e-17		2.9653	7.6634
Gh_D05G2739	25.2761	0.483588	5.7079	1.1016e-07	9.6063e-07	17.219	0	Inf	3.7721e-06	4.9157e-05		5.7079	Inf
Gh_D05G3030	47.3188	244.799	-2.3711	4.9839e-26	1.7424e-24	633.99	1609.6	-1.3442	1.1387e-70	3.6551e-68		-2.3711	-1.3442
Gh_D05G3180	13.7816	39.6361	-1.5241	0.0023596	0.0094511	16.5037	52.2669	-1.6631	5.7213e-05	0.0005776		-1.5241	-1.6631
Gh_D05G3263	73.4425	17.0138	2.1099	5.528e-08	5.0026e-07	38.6844	13.1615	1.5554	0.0013631	0.009478		2.1099	1.5554
Gh_D05G3474	1063.59	302.445	1.8142	3.9989e-69	5.7045e-67	379.643	93.405	2.0231	5.7659e-27	4.1429e-25		1.8142	2.0231
Gh_D05G3533	89.9847	3.06071	4.8777	1.168e-19	2.8674e-18	71.3341	2.00812	5.1507	3.4034e-09	6.9221e-08		4.8777	5.1507
Gh_D05G3595	130.363	57.611	1.1781	5.7282e-06	3.8976e-05	50.5164	18.6593	1.4369	0.0025281	0.015994		1.1781	1.4369
Gh_D05G3614	319.618	769.149	-1.2669	1.1801e-29	4.9554e-28	24.0365	82.2516	-1.7748	1.2643e-07	2.0771e-06		-1.2669	-1.7748
Gh_D05G3615	202.446	631.824	-1.642	1.1223e-36	6.341e-35	24.6916	111.011	-2.1686	1.8444e-12	5.2094e-11		-1.642	-2.1686
Gh_D05G3656	22.0426	58.3602	-1.4047	0.00052392	0.0024579	0	8.74157	#NAME?	0.002372	0.015174		-1.4047	#NAME?
Gh_D05G3711	409.563	1055.08	-1.3652	1.0549e-14	1.8184e-13	393.586	889.777	-1.1768	2.5243e-34	2.5057e-32		-1.3652	-1.1768
Gh_D05G3719	25.8278	80.5282	-1.6406	1.9073e-05	0.00011873	35.0365	76.7293	-1.1309	0.00036322	0.003006		-1.6406	-1.1309
Gh_D06G0184	1828.26	810.648	1.1733	1.7601e-53	1.6624e-51	1213.65	490.094	1.3082	3.4049e-53	6.7792e-51		1.1733	1.3082
Gh_D06G0375	2084.31	413.957	2.332	1.5924e-173	9.5998e-171	780.634	237.192	1.7186	1.3113e-33	1.2669e-31		2.332	1.7186
Gh_D06G0576	324.961	695.067	-1.0969	1.2055e-21	3.3482e-20	120.413	645.079	-2.4215	2.4585e-51	4.6268e-49		-1.0969	-2.4215
Gh_D06G0864	1536.99	268.388	2.5177	6.4431e-136	2.5237e-133	828.379	309.782	1.419	7.3771e-43	1.0341e-40		2.5177	1.419
Gh_D06G1143	17.0151	44.1769	-1.3765	0.0028389	0.011141	8.48905	34.1588	-2.0086	0.00028329	0.0024188		-1.3765	-2.0086
Gh_D06G1197	264.512	45.8812	2.5274	3.7209e-31	1.6751e-29	59.8449	15.0467	1.9918	1.0669e-06	1.5303e-05		2.5274	1.9918
Gh_D06G1578	2582.18	1118	1.2077	5.4557e-72	8.2404e-70	1939.6	962.852	1.0104	6.2334e-52	1.1994e-49		1.2077	1.0104
Gh_D06G1690	211.377	1397.84	-2.7253	3.9116e-149	1.7383e-146	172.551	633.403	-1.8761	4.8738e-51	9.0974e-49		-2.7253	-1.8761
Gh_D06G1997	48.8764	126.185	-1.3683	4.2153e-07	3.3898e-06	32.0475	67.5349	-1.0754	0.0013568	0.0094399		-1.3683	-1.0754
Gh_D06G2009	935.472	436.728	1.099	1.7416e-28	6.943e-27	145.515	67.8648	1.1004	0.00075324	0.0056664		1.099	1.1004
Gh_D06G2175	0	13.2455	#NAME?	0.00023117	0.0011725	0.956202	17.7044	-4.2106	9.6064e-05	0.00092482		#NAME?	-4.2106
Gh_D06G2176	81.8419	178.937	-1.1285	2.9341e-07	2.4173e-06	44.542	620.326	-3.7998	5.7436e-119	4.6415e-116		-1.1285	-3.7998
Gh_D06G2270	959.485	140.009	2.7767	3.0177e-115	8.645e-113	265.17	49.7813	2.4132	6.237e-25	4.0609e-23		2.7767	2.4132
Gh_D06G2344	354.003	38.309	3.208	8.5955e-55	8.4168e-53	156.714	72.0635	1.1208	0.00092191	0.006749		3.208	1.1208
Gh_D06G2355	210.825	57.4224	1.8764	2.4264e-17	5.0744e-16	107.376	15.2188	2.8187	9.447e-17	3.8104e-15		1.8764	2.8187
Gh_D06G2361	293.395	91.8688	1.6752	1.0258e-19	2.5282e-18	368.247	111.036	1.7297	1.2998e-23	7.9365e-22		1.6752	1.7297
Gh_D06G2394	4245.26	140.587	4.9163	0	0	382.876	29.9355	3.6769	1.0616e-73	3.6643e-71		4.9163	3.6769
Gh_D07G0089	260.451	16.0821	4.0175	1.5335e-34	7.9994e-33	93.0293	3.86875	4.5877	5.6669e-23	3.379e-21		4.0175	4.5877
Gh_D07G0093	963.568	73.2095	3.7183	5.1763e-164	2.6982e-161	93.6352	19.1121	2.2926	5.314e-07	7.9873e-06		3.7183	2.2926
Gh_D07G0145	51.3605	196.782	-1.9379	1.336e-16	2.6426e-15	105.648	218.153	-1.0461	1.6474e-08	3.0583e-07		-1.9379	-1.0461
Gh_D07G0362	24.862	67.0881	-1.4321	0.00012537	0.00067199	0	10.7743	#NAME?	0.00054646	0.0042912		-1.4321	#NAME?
Gh_D07G0465	82.0582	34.0925	1.2672	0.00016111	0.0008451	163.708	77.93	1.0709	1.2669e-05	0.0001484		1.2672	1.0709
Gh_D07G0469	243.434	88.7138	1.4563	4.0912e-05	0.00024023	197.597	67.3524	1.5528	1.0747e-13	3.416e-12		1.4563	1.5528
Gh_D07G0505	107.827	10.8275	3.3159	7.185e-19	1.6755e-17	28.8175	5.80313	2.312	0.00023287	0.002032		3.3159	2.312
Gh_D07G0510	108.143	308.932	-1.5143	2.5418e-17	5.3077e-16	118.323	270.631	-1.1936	2.9188e-12	8.1203e-11		-1.5143	-1.1936
Gh_D07G0535	805.069	63.0957	3.6735	4.9155e-138	1.9698e-135	624.789	6.35432	6.6195	1.5656e-178	2.623e-175		3.6735	6.6195
Gh_D07G0559	591.878	239.65	1.3044	2.044e-25	6.9601e-24	1468	720.931	1.0259	4.0145e-42	5.4283e-40		1.3044	1.0259
Gh_D07G0581	328.826	893.583	-1.4423	4.8842e-41	3.1854e-39	225.048	475.008	-1.0777	2.6037e-17	1.1013e-15		-1.4423	-1.0777
Gh_D07G0780	133.163	60.9607	1.1272	9.6937e-06	6.3592e-05	235.988	97.1404	1.2806	4.4858e-12	1.2256e-10		1.1272	1.2806
Gh_D07G0940	1376.5	602.243	1.1926	1.5625e-44	1.1391e-42	115.692	16.6757	2.7945	1.2479e-17	5.3943e-16		1.1926	2.7945
Gh_D07G1030	1444.05	525.63	1.458	1.365e-63	1.6959e-61	1201.26	506.562	1.2457	4.7909e-49	8.4165e-47		1.458	1.2457
Gh_D07G1072	55.9152	133.663	-1.2573	1.2951e-06	9.75e-06	148.341	368.431	-1.3125	1.2445e-18	5.7409e-17		-1.2573	-1.3125
Gh_D07G1303	534.977	1293.23	-1.2734	6.5979e-46	4.9991e-44	339.708	753.194	-1.1487	3.3598e-28	2.5671e-26		-1.2734	-1.1487
Gh_D07G1306	104.456	253.432	-1.2787	1.2858e-11	1.7051e-10	164.894	343.137	-1.0572	1.7085e-12	4.8355e-11		-1.2787	-1.0572
Gh_D07G1331	53.5293	136.046	-1.3457	1.9208e-07	1.6254e-06	74.6132	159.753	-1.0983	6.4174e-07	9.527e-06		-1.3457	-1.0983
Gh_D07G1488	29.1996	2.642	3.4662	3.8213e-06	2.6792e-05	16.2026	0.477449	5.0847	5.3632e-05	0.00054546		3.4662	5.0847
Gh_D07G1611	130.225	22.3272	2.5441	6.1683e-16	1.163e-14	36.053	1.9098	4.2386	5.6764e-09	1.1179e-07		2.5441	4.2386
Gh_D07G1691	10.4693	38.8635	-1.8923	0.00040632	0.0019573	29.0584	59.2707	-1.0284	0.0038664	0.022875		-1.8923	-1.0284
Gh_D07G1814	58.2022	0.418706	7.119	7.0131e-18	1.5289e-16	49.9818	1.43235	5.1249	8.8546e-14	2.8316e-12		7.119	5.1249
Gh_D07G1835	336.516	152.228	1.1444	7.8326e-13	1.1554e-11	99.9034	40.0849	1.3175	3.7541e-06	4.8931e-05		1.1444	1.3175
Gh_D07G1914	700.1	1640.68	-1.2287	3.0106e-52	2.7212e-50	1418.17	8267.61	-2.5434	2.736e-123	2.3492e-120		-1.2287	-2.5434
Gh_D07G1936	328.274	123.838	1.4064	4.0103e-17	8.2598e-16	172.551	62.8937	1.456	6.4967e-11	1.5995e-09		1.4064	1.456
Gh_D07G1996	37.5395	84.7213	-1.1743	0.00028995	0.0014414	9.14782	37.5993	-2.0392	9.7795e-05	0.00093925		-1.1743	-2.0392
Gh_D07G2014	228.746	112.917	1.0185	6.5921e-08	5.9069e-07	261.466	112.63	1.215	1.7817e-05	0.00020223		1.0185	1.215
Gh_D07G2080	195.21	506.045	-1.3742	3.2182e-23	9.7343e-22	235.683	736.761	-1.6444	3.1449e-48	5.4142e-46		-1.3742	-1.6444
Gh_D07G2124	314.335	883.557	-1.491	6.6249e-43	4.6068e-41	970.257	1988.89	-1.0355	2.2827e-55	4.7805e-53		-1.491	-1.0355
Gh_D07G2423	91.1275	237.174	-1.38	1.8466e-09	1.9883e-08	272.515	1258.62	-2.2074	7.5214e-120	6.1506e-117		-1.38	-2.2074
Gh_D08G0079	604.062	140.693	2.1021	1.4908e-52	1.3635e-50	156.228	41.4926	1.9127	1.7249e-14	5.8422e-13		2.1021	1.9127
Gh_D08G0132	121.944	35.4784	1.7812	5.5557e-10	6.309e-09	172.495	37.0481	2.2191	4.1262e-19	1.9587e-17		1.7812	2.2191
Gh_D08G0270	105.186	293.292	-1.4794	3.0181e-16	5.8332e-15	272.157	1215.5	-2.159	9.441e-113	6.485e-110		-1.4794	-2.159
Gh_D08G0415	55.8758	135.238	-1.2752	7.4779e-07	5.8159e-06	257.924	526.886	-1.0305	1.8161e-17	7.7483e-16		-1.2752	-1.0305
Gh_D08G0564	8.75401	35.9914	-2.0396	0.00030114	0.0014912	1.49453	13.7619	-3.2029	0.0028985	0.017969		-2.0396	-3.2029
Gh_D08G0665	54.1404	119.976	-1.148	2.1889e-05	0.00013485	275.561	621.34	-1.173	8.9606e-25	5.7903e-23		-1.148	-1.173
Gh_D08G0690	1246.96	433.72	1.5236	4.0161e-21	1.0729e-19	989.979	378.665	1.3865	1.0394e-48	1.8213e-46		1.5236	1.3865
Gh_D08G0973	859.977	2014.54	-1.2281	3.8227e-61	4.4617e-59	596.86	1201.18	-1.009	1.7964e-34	1.8014e-32		-1.2281	-1.009
Gh_D08G0986	1019.17	466.822	1.1264	1.1031e-31	5.0715e-30	505.344	235.001	1.1046	9.6119e-17	3.8701e-15		1.1264	1.1046
Gh_D08G1112	191.364	25.0696	2.9323	6.8899e-28	2.67e-26	127.283	4.37078	4.864	1.0744e-27	8.0392e-26		2.9323	4.864
Gh_D08G1356	58.7933	253.444	-2.1079	4.0055e-23	1.2063e-21	80.418	184.767	-1.2001	5.7708e-09	1.1352e-07		-2.1079	-1.2001
Gh_D08G1410	26.8732	104.277	-1.9562	1.8239e-09	1.9659e-08	40.5968	13.1861	1.6223	0.00065035	0.0049814		-1.9562	1.6223
Gh_D08G1430	40.3588	0	Inf	2.0001e-13	3.1119e-12	116.942	2.9876	5.2907	1.1196e-31	9.9879e-30		Inf	5.2907
Gh_D08G1639	35.4101	95.9321	-1.4379	4.4775e-06	3.0986e-05	153.721	315.575	-1.0377	1.586e-11	4.1314e-10		-1.4379	-1.0377
Gh_D08G1716	20.7415	0.418706	5.6304	1.4034e-05	8.953e-05	11	0	Inf	0.00037718	0.003105		5.6304	Inf
Gh_D08G1717	707.986	306.52	1.2077	2.5957e-26	9.2283e-25	270.478	80.6226	1.7463	3.5338e-21	1.9053e-19		1.2077	1.7463
Gh_D08G1777	6874.9	436.238	3.9782	0	0	1656.11	79.0428	4.389	0	0		3.9782	4.389
Gh_D08G1862	24.9408	1.321	4.2388	2.8107e-06	2.0136e-05	66.0676	6.30516	3.3893	7.7007e-13	2.2692e-11		4.2388	3.3893
Gh_D08G2092	107.433	44.7548	1.2633	1.1658e-05	7.5511e-05	222.416	42.093	2.4016	6.8196e-27	4.8796e-25		1.2633	2.4016
Gh_D08G2224	166.444	353.174	-1.0853	4.7137e-12	6.5124e-11	758.618	1565.02	-1.0447	4.4511e-42	5.9717e-40		-1.0853	-1.0447
Gh_D08G2430	202.13	72.9855	1.4696	8.3e-12	1.1212e-10	86.2757	37.7714	1.1917	8.1235e-05	0.00079398		1.4696	1.1917
Gh_D08G2489	81.3489	27.1631	1.5825	4.0495e-06	2.8243e-05	134.345	53.9801	1.3154	1.1277e-07	1.8639e-06		1.5825	1.3154
Gh_D08G2680	50.9664	151.981	-1.5763	0.00058767	0.002729	0	144.914	#NAME?	8.7732e-47	1.4348e-44		-1.5763	#NAME?
Gh_D08G2743	145.603	51.3953	1.5023	1.2309e-08	1.2065e-07	114.073	12.2312	3.2213	2.2185e-20	1.1372e-18		1.5023	3.2213
Gh_D09G0058	34.7989	6.605	2.3974	5.9722e-05	0.00034019	69.595	3.41588	4.3487	8.9161e-17	3.6111e-15		2.3974	4.3487
Gh_D09G0075	343.751	1310.13	-1.9303	2.0565e-28	8.1564e-27	456.65	1149.82	-1.3322	7.3969e-52	1.4192e-49		-1.9303	-1.3322
Gh_D09G0128	101.459	538.964	-2.4093	6.6068e-55	6.497e-53	0	23.8866	#NAME?	3.2572e-08	5.8038e-07		-2.4093	#NAME?
Gh_D09G0264	1986.16	590.612	1.7497	3.4703e-29	1.4321e-27	288.778	89.2905	1.6934	2.0507e-21	1.1206e-19		1.7497	1.6934
Gh_D09G0390	463.388	192.507	1.2673	1.3255e-19	3.2448e-18	181.341	42.2405	2.102	7.7666e-19	3.6366e-17		1.2673	2.102
Gh_D09G0401	6.62461	29.2921	-2.1446	0.0008332	0.0037419	39.2792	78.7128	-1.0028	0.0012437	0.0087459		-2.1446	-1.0028
Gh_D09G0485	227.465	93.06	1.2894	6.7421e-11	8.3977e-10	48.1333	19.6387	1.2933	0.0021011	0.013706		1.2894	1.2933
Gh_D09G0638	83.1036	0	Inf	4.4654e-27	1.6626e-25	46.9927	11.3255	2.0529	9.878e-06	0.00011831		Inf	2.0529
Gh_D09G0687	35.4101	5.08936	2.7986	9.5531e-06	6.2753e-05	23.2573	4.44452	2.3876	0.00070986	0.0053766		2.7986	2.3876
Gh_D09G0688	38.1112	118.188	-1.6328	5.9944e-07	4.7279e-06	109.834	285.994	-1.3807	5.2591e-16	2.0147e-14		-1.6328	-1.3807
Gh_D09G0861	8658.73	1226.26	2.8199	0	0	5630.64	357.594	3.9769	2.7941e-227	8.7238e-224		2.8199	3.9769
Gh_D09G0921	20.7415	76.7538	-1.8877	4.9139e-07	3.9239e-06	51.7135	126.132	-1.2863	4.7666e-07	7.2246e-06		-1.8877	-1.2863
Gh_D09G1028	67.2714	27.9062	1.2694	0.00042588	0.0020417	30.5493	8.88905	1.781	0.0013038	0.0091149		1.2694	1.781
Gh_D09G1202	99.3298	44.9849	1.1428	8.5725e-05	0.00047409	33.4818	8.36244	2.0014	0.0002912	0.0024783		1.1428	2.0014
Gh_D09G1208	79.4753	186.457	-1.2303	8.8965e-05	0.00049091	80.7757	198.711	-1.2987	1.237e-10	2.9524e-09		-1.2303	-1.2987
Gh_D09G1224	858.222	242.51	1.8233	1.5679e-31	7.156e-30	472.672	209.215	1.1759	1.6826e-16	6.6695e-15		1.8233	1.1759
Gh_D09G1287	46.747	16.2413	1.5252	0.00066253	0.0030392	24.1533	6.3789	1.9208	0.0029545	0.018264		1.5252	1.9208
Gh_D09G1342	162.342	5.284	4.9413	1.7128e-39	1.0583e-37	125.559	1.93438	6.0203	5.6785e-36	6.0101e-34		4.9413	6.0203
Gh_D09G1397	42.8429	12.2134	1.8106	0.0036946	0.014048	26.9051	5.37484	2.3236	0.00036102	0.0029903		1.8106	2.3236
Gh_D09G1409	295.624	1766.78	-2.5793	3.4332e-169	1.951e-166	213.19	530.095	-1.3141	1.002e-15	3.7713e-14		-2.5793	-1.3141
Gh_D09G1435	106.96	24.9398	2.1006	1.6594e-08	1.6018e-07	69.8924	9.69646	2.8496	2.3799e-11	6.0998e-10		2.1006	2.8496
Gh_D09G1516	692.174	109.042	2.6663	1.4432e-81	2.6192e-79	249.559	39.7653	2.6498	1.1958e-33	1.1569e-31		2.6663	2.6498
Gh_D09G1575	284.701	688.22	-1.2734	3.3621e-24	1.0673e-22	485.471	1224.43	-1.3346	3.888e-24	2.4412e-22		-1.2734	-1.3346
Gh_D09G1582	1292.61	246.32	2.3917	1.4769e-122	4.9225e-120	604.995	173.013	1.806	1.2926e-46	2.0843e-44		2.3917	1.806
Gh_D09G1681	11734.5	3988.17	1.557	8.532e-252	1.3443e-248	1923.07	943.248	1.0277	2.2517e-53	4.5092e-51		1.557	1.0277
Gh_D09G1705	26.0055	65.2835	-1.3279	0.00035842	0.0017471	81.1296	292.302	-1.8492	3.5359e-19	1.689e-17		-1.3279	-1.8492
Gh_D09G1776	966.898	210.087	2.2024	6.5406e-66	8.6536e-64	364.471	150.583	1.2752	1.2686e-17	5.4773e-16		2.2024	1.2752
Gh_D09G1854	29.8502	86.3901	-1.5331	4.2766e-06	2.9699e-05	17.6971	120.17	-2.7635	7.93e-18	3.4717e-16		-1.5331	-2.7635
Gh_D09G1937	951.48	363.164	1.3896	8.4317e-42	5.6315e-40	563.506	270.971	1.0563	2.4461e-19	1.1849e-17		1.3896	1.0563
Gh_D09G2017	155.837	1138.69	-2.8693	2.5341e-133	9.653e-131	69.0567	165.749	-1.2632	0.00014453	0.0013326		-2.8693	-1.2632
Gh_D09G2362	64.8662	0	Inf	2.7043e-21	7.3066e-20	49.6241	5.82771	3.09	3.9997e-09	8.0641e-08		Inf	3.09
Gh_D10G0177	53.0757	207.015	-1.9636	4.653e-15	8.225e-14	21.9435	129.523	-2.5613	1.1066e-17	4.7959e-16		-1.9636	-2.5613
Gh_D10G0236	65.7138	19.5321	1.7503	4.6055e-06	3.1814e-05	18.4763	1.95896	3.2375	0.00037867	0.0031158		1.7503	3.2375
Gh_D10G0308	19.6374	0	Inf	8.7212e-06	5.7654e-05	28.7573	0.502029	5.84	6.7986e-09	1.3275e-07		Inf	5.84
Gh_D10G0309	36.396	0.418706	6.4417	4.5436e-11	5.7544e-10	45.1443	0	Inf	8.0522e-11	1.9662e-09		6.4417	Inf
Gh_D10G0322	5.4417	39.1819	-2.8481	2.6839e-06	1.9274e-05	15.3668	39.1054	-1.3475	0.0034394	0.02074		-2.8481	-1.3475
Gh_D10G0403	24.7044	55.3938	-1.165	0.0037521	0.014236	4.00548	30.1426	-2.9118	0.00034045	0.0028454		-1.165	-2.9118
Gh_D10G0462	162.303	699.224	-2.1071	7.335e-58	7.7755e-56	24.6916	69.9467	-1.5022	2.2182e-05	0.00024596		-2.1071	-1.5022
Gh_D10G0572	55.0475	200.946	-1.8681	6.0304e-16	1.1379e-14	42.6862	92.4255	-1.1145	0.00013389	0.001245		-1.8681	-1.1145
Gh_D10G0627	358.064	966.957	-1.4332	1.1346e-43	8.0262e-42	33.3011	74.6124	-1.1638	0.00038115	0.0031336		-1.4332	-1.1638
Gh_D10G0666	74.4284	35.8971	1.052	0.0015797	0.0066203	48.1296	16.1491	1.5755	0.00025876	0.002234		1.052	1.5755
Gh_D10G0687	85.0159	180.294	-1.0845	5.9254e-07	4.6772e-06	20.5092	55.4511	-1.4349	0.00023922	0.0020821		-1.0845	-1.4349
Gh_D10G1061	80.659	23.3948	1.7856	3.741e-07	3.0327e-06	59.5475	21.4994	1.4697	0.00010731	0.0010225		1.7856	1.4697
Gh_D10G1139	389.73	193.621	1.0092	6.4315e-07	5.0519e-06	247.044	104.657	1.2391	5.5512e-12	1.4988e-10		1.0092	1.2391
Gh_D10G1222	114.255	21.5547	2.4062	1.4565e-13	2.2908e-12	21.7628	3.46505	2.6509	0.00047463	0.0037976		2.4062	2.6509
Gh_D10G1434	5535.52	1672.91	1.7264	1.4501e-211	1.3963e-208	2374.52	1056.62	1.1682	3.2697e-78	1.2409e-75		1.7264	1.1682
Gh_D10G1707	21794.1	2788.52	2.9664	2.7445e-117	8.1662e-115	9858.35	1566.13	2.6541	0	0		2.9664	2.6541
Gh_D10G1743	83.3794	25.0047	1.7375	5.592e-07	4.4337e-06	23.1369	3.86875	2.5803	0.00041039	0.003338		1.7375	2.5803
Gh_D10G1767	1171.55	71.5702	4.0329	7.766e-213	7.8029e-210	1058.71	100.995	3.39	4.4601e-172	6.5185e-169		4.0329	3.39
Gh_D10G1843	252.978	94.6699	1.418	1.2805e-13	2.0209e-12	80.5348	20.5199	1.9726	1.8395e-08	3.392e-07		1.418	1.9726
Gh_D10G1900	355.64	149.232	1.2529	1.5782e-15	2.8938e-14	231.093	106.493	1.1177	1.952e-05	0.00021949		1.2529	1.1177
Gh_D10G2001	28.0955	6.38094	2.1385	0.0007451	0.0033826	0	14.2393	#NAME?	4.3005e-05	0.00044717		2.1385	#NAME?
Gh_D10G2020	597.852	159.152	1.9094	2.9873e-45	2.215e-43	316.026	127.992	1.304	2.7304e-08	4.9213e-07		1.9094	1.304
Gh_D10G2205	68.9473	176.785	-1.3584	3.1539e-09	3.3139e-08	23.438	66.7766	-1.5105	2.8911e-05	0.0003122		-1.3584	-1.5105
Gh_D10G2219	327.189	979.755	-1.5823	2.6231e-51	2.2962e-49	1.07665	12.7824	-3.5695	0.0021069	0.01374		-1.5823	-3.5695
Gh_D10G2233	82.65	10.8924	2.9237	4.8889e-13	7.3506e-12	52.9106	13.7373	1.9455	6.0897e-06	7.5986e-05		2.9237	1.9455
Gh_D10G2391	418.692	161.894	1.3708	2.5035e-20	6.4044e-19	145.944	52.6706	1.4703	1.3127e-09	2.7805e-08		1.3708	1.4703
Gh_D10G2461	30.5007	70.5321	-1.2094	0.0011078	0.0048192	4.66425	27.3517	-2.5519	0.00011335	0.0010729		-1.2094	-2.5519
Gh_D10G2502	1.67586	40.9865	-4.6122	8.3313e-10	9.2905e-09	0.478101	46.1584	-6.5931	4.5245e-14	1.4835e-12		-4.6122	-6.5931
Gh_D10G2586	27.2278	110.781	-2.0246	1.2753e-10	1.5468e-09	39.938	96.4172	-1.2715	1.1848e-05	0.00013953		-2.0246	-1.2715
Gh_D11G0086	119.677	295.875	-1.3058	1.4928e-13	2.3431e-12	214.515	1078.23	-2.3295	1.0099e-111	6.8008e-109		-1.3058	-2.3295
Gh_D11G0146	253.549	76.6301	1.7263	1.3818e-10	1.6698e-09	900.722	225.255	1.9995	2.4733e-77	9.2837e-75		1.7263	1.9995
Gh_D11G0177	29.3572	146.838	-2.3224	4.5209e-16	8.6248e-15	52.4927	109.308	-1.0582	5.9027e-05	0.00059442		-2.3224	-1.0582
Gh_D11G0400	174.784	82.7221	1.0792	0.002715	0.010718	200.593	18.0097	3.4774	3.1296e-37	3.5126e-35		1.0792	3.4774
Gh_D11G0514	319.677	36.7345	3.1214	1.1621e-48	9.557e-47	68.6953	33.9026	1.0188	0.001908	0.012629		3.1214	1.0188
Gh_D11G0605	7.76812	38.9933	-2.3276	4.0513e-05	0.00023805	26.7245	70.4241	-1.3979	5.7384e-05	0.00057916		-2.3276	-1.3979
Gh_D11G0686	162.797	18.3997	3.1453	7.3082e-11	9.0735e-10	145.529	1.48151	6.6181	2.8976e-43	4.1039e-41		3.1453	6.6181
Gh_D11G0697	80.7571	7.50729	3.4272	8.0865e-15	1.4033e-13	52.7336	20.3724	1.3721	0.00066748	0.0050961		3.4272	1.3721
Gh_D11G0739	52.3463	118	-1.1726	1.4397e-05	9.1622e-05	18.8377	52.8673	-1.4888	0.00048606	0.0038795		-1.1726	-1.4888
Gh_D11G0743	509.661	76.3118	2.7396	8.1133e-38	4.7871e-36	329.916	17.7044	4.2199	2.3464e-72	7.7861e-70		2.7396	4.2199
Gh_D11G0882	75.0001	4.64123	4.0143	2.076e-16	4.0473e-15	101.217	2.86469	5.1429	6.3061e-27	4.5216e-25		4.0143	5.1429
Gh_D11G0902	550.06	73.9881	2.8942	7.5203e-74	1.1716e-71	174.042	51.1295	1.7672	1.5117e-14	5.1457e-13		2.8942	1.7672
Gh_D11G1050	41.4235	157.701	-1.9287	1.7489e-13	2.7302e-12	2.51095	29.911	-3.5744	1.218e-06	1.7286e-05		-1.9287	-3.5744
Gh_D11G1052	688.427	298.624	1.205	1.5515e-25	5.3091e-24	374.557	48.3736	2.9529	1.2871e-24	8.2553e-23		1.205	2.9529
Gh_D11G1180	403.155	16.2707	4.631	2.2824e-89	4.6954e-87	125.736	6.85635	4.1968	1.5158e-28	1.1752e-26		4.631	4.1968
Gh_D11G1439	68.0008	28.1009	1.2749	0.00036063	0.0017566	46.876	19.1367	1.2925	0.0021812	0.014156		1.2749	1.2925
Gh_D11G1463	245.723	44.0178	2.4809	5.3578e-28	2.0879e-26	250.214	52.2177	2.2605	8.505e-28	6.3778e-26		2.4809	2.2605
Gh_D11G1510	19.7162	53.7484	-1.4468	0.00063046	0.0029077	34.4982	75.8481	-1.1366	0.00038597	0.0031634		-1.4468	-1.1366
Gh_D11G1548	353.707	1717.93	-2.28	1.2708e-37	7.4474e-36	222.225	1206.13	-2.4403	1.9211e-106	1.1678e-103		-2.28	-2.4403
Gh_D11G1914	103.885	408.143	-1.9741	1.821e-32	8.7249e-31	249.371	719.488	-1.5287	4.1119e-42	5.5491e-40		-1.9741	-1.5287
Gh_D11G1920	30.7572	87.9412	-1.5156	5.5927e-06	3.8117e-05	42.6862	86.7453	-1.023	0.0006121	0.0047279		-1.5156	-1.023
Gh_D11G1996	32.5907	377.937	-3.5356	2.2992e-41	1.5166e-39	3.52738	41.591	-3.5596	7.8261e-09	1.5181e-07		-3.5356	-3.5596
Gh_D11G2003	147.595	69.1462	1.0939	5.3808e-06	3.6753e-05	31.9873	8.33786	1.9397	0.00056198	0.0043921		1.0939	1.9397
Gh_D11G2446	698.444	154.77	2.174	1.4117e-62	1.711e-60	229.17	68.4652	1.743	4.1873e-18	1.8641e-16		2.174	1.743
Gh_D11G2447	102.977	45.8872	1.1662	4.4945e-05	0.0002622	344.915	90.0137	1.938	1.2885e-30	1.0967e-28		1.1662	1.938
Gh_D11G2469	847.262	255.797	1.7278	1.8971e-53	1.7869e-51	392.931	45.9618	3.0958	1.5528e-62	4.0099e-60		1.7278	3.0958
Gh_D11G2709	135.055	60.1293	1.1674	3.6553e-06	2.5704e-05	78.8559	19.9933	1.9797	4.1115e-08	7.2359e-07		1.1674	1.9797
Gh_D11G3009	1753.57	171.135	3.3571	1.4379e-245	2.121e-242	223.124	60.2011	1.89	6.8676e-20	3.4184e-18		3.3571	1.89
Gh_D11G3035	1246.99	2582.24	-1.0502	2.2425e-56	2.2863e-54	1340.39	2856.53	-1.0916	5.056e-80	1.9621e-77		-1.0502	-1.0916
Gh_D11G3268	425.691	74.4656	2.5152	2.607e-48	2.109e-46	480.626	110.888	2.1158	4.7454e-47	7.8168e-45		2.5152	2.1158
Gh_D11G3271	35.9424	395.464	-3.4598	1.606e-40	1.0329e-38	19.011	139.258	-2.8729	3.2898e-21	1.7779e-19		-3.4598	-2.8729
Gh_D11G3304	117.213	822.137	-2.8103	3.1555e-97	7.2199e-95	25.8887	140.237	-2.4375	8.5275e-18	3.7167e-16		-2.8103	-2.4375
Gh_D11G3394	131.349	10.8275	3.6006	1.0399e-24	3.4135e-23	30.4891	4.41994	2.7862	2.6003e-05	0.00028365		3.6006	2.7862
Gh_D12G0035	29.239	195.107	-2.7383	2.9801e-25	1.0054e-23	29.4161	70.8033	-1.2672	0.000173	0.0015649		-2.7383	-1.2672
Gh_D12G0041	100.158	326.848	-1.7063	1.1647e-21	3.2403e-20	222.289	770.467	-1.7933	5.5355e-57	1.2345e-54		-1.7063	-1.7933
Gh_D12G0066	2257.59	768.972	1.5538	6.371e-99	1.4972e-96	271.969	118.994	1.1926	1.9143e-12	5.4e-11		1.5538	1.1926
Gh_D12G0132	848.228	100.09	3.0832	1.4256e-118	4.3925e-116	338.696	95.034	1.8335	6.0488e-28	4.5759e-26		3.0832	1.8335
Gh_D12G0194	115.28	7.15347	4.0104	3.661e-24	1.16e-22	20.8668	0.502029	5.3773	2.0964e-06	2.8612e-05		4.0104	5.3773
Gh_D12G0237	464.808	219.859	1.0801	2.5583e-15	4.602e-14	155.995	57.6172	1.4369	2.7977e-08	5.0386e-07		1.0801	1.4369
Gh_D12G0423	203.825	493.702	-1.2763	2.0328e-20	5.2157e-19	128.664	267.924	-1.0582	3.4984e-10	7.952e-09		-1.2763	-1.0582
Gh_D12G0590	197.576	95.2893	1.052	1.9892e-07	1.6795e-06	116.704	47.222	1.3053	7.9276e-07	1.1606e-05		1.052	1.3053
Gh_D12G0595	22.772	237.651	-3.3835	2.9515e-38	1.7686e-36	18.0548	252.007	-3.803	4.5142e-50	8.2032e-48		-3.3835	-3.803
Gh_D12G0735	527.505	228.492	1.207	3.2943e-20	8.3843e-19	238.374	13.2107	4.1735	1.8387e-52	3.5881e-50		1.207	4.1735
Gh_D12G0761	75.9265	175.517	-1.2089	4.8433e-08	4.4163e-07	215.174	593.683	-1.4642	2.7227e-33	2.612e-31		-1.2089	-1.4642
Gh_D12G1244	82.7683	272.068	-1.7168	1.3025e-18	2.9714e-17	88.5457	255.984	-1.5316	1.0725e-16	4.3107e-15		-1.7168	-1.5316
Gh_D12G1264	969.875	101.605	3.2548	1.5602e-142	6.516e-140	910.627	364.208	1.3221	2.4918e-42	3.4164e-40		3.2548	1.3221
Gh_D12G1366	154.081	46.1113	1.7405	8.7378e-12	1.1779e-10	66.1844	1.45693	5.5055	1.0274e-18	4.7651e-17		1.7405	5.5055
Gh_D12G1535	13.821	58.8438	-2.09	2.4395e-06	1.7656e-05	11.2409	47.6399	-2.0834	7.9259e-06	9.6599e-05		-2.09	-2.0834
Gh_D12G1645	40.4771	98.7688	-1.287	2.0012e-05	0.00012398	9.68615	36.4969	-1.9138	0.00088643	0.0065233		-1.287	-1.9138
Gh_D12G1665	71.2737	32.5769	1.1295	0.0011453	0.0049671	62.5402	31.245	1.0012	0.004236	0.024678		1.1295	1.0012
Gh_D12G1687	40.3588	239.585	-2.5696	3.6755e-28	1.4388e-26	58.7117	118.896	-1.018	5.0312e-05	0.00051528		-2.5696	-1.018
Gh_D12G1712	52.6817	127.565	-1.2759	4.1451e-05	0.00024313	140.508	320.019	-1.1875	3.2761e-14	1.0819e-12		-1.2759	-1.1875
Gh_D12G1759	42.2912	13.6642	1.63	0.00059859	0.0027751	137.161	48.019	1.5142	7.1844e-09	1.3996e-07		1.63	1.5142
Gh_D12G1971	100.592	427.634	-2.0879	7.3709e-37	4.2024e-35	80.0567	207.772	-1.3759	6.7149e-12	1.8017e-10		-2.0879	-1.3759
Gh_D12G1978	76.0061	161.281	-1.0854	2.9111e-06	2.0789e-05	69.8322	276.567	-1.9857	1.4385e-25	9.6495e-24		-1.0854	-1.9857
Gh_D12G2088	27.7996	71.4698	-1.3623	0.0001249	0.00066961	73.4198	167.122	-1.1867	4.3017e-08	7.5551e-07		-1.3623	-1.1867
Gh_D12G2223	12.1057	110.21	-3.1865	2.0805e-17	4.3721e-16	3.52738	37.7714	-3.4206	7.9383e-08	1.3414e-06		-3.1865	-3.4206
Gh_D12G2226	18.1586	104.56	-2.5256	4.7202e-13	7.1109e-12	1.97263	15.7208	-2.9945	0.0020666	0.013517		-2.5256	-2.9945
Gh_D12G2235	9.97632	37.8315	-1.923	0.00038552	0.0018667	22.4818	211.922	-3.2367	2.221e-36	2.4101e-34		-1.923	-3.2367
Gh_D12G2247	4864.93	436.261	3.4792	0	0	260.683	116.375	1.1635	1.8917e-11	4.8905e-10		3.4792	1.1635
Gh_D12G2347	34892	10041.9	1.7969	1.1732e-118	3.631e-116	5967.9	1845.79	1.693	1.2542e-282	7.179e-279		1.7969	1.693
Gh_D12G2477	30.639	0.902294	5.0856	2.0658e-08	1.9729e-07	78.9235	38.1259	1.0497	0.00079414	0.0059286		5.0856	1.0497
Gh_D12G2500	1033.32	268.559	1.944	2.8563e-75	4.5522e-73	182.953	40.5623	2.1733	8.6123e-20	4.2661e-18		1.944	2.1733
Gh_D12G2524	67.7049	168.009	-1.3112	1.1701e-08	1.1503e-07	43.2884	103.347	-1.2554	6.1847e-06	7.7074e-05		-1.3112	-1.2554
Gh_D12G2552	462.402	931.42	-1.0103	1.8901e-24	6.1059e-23	751.676	2971.6	-1.9831	9.9556e-216	2.4423e-212		-1.0103	-1.9831
Gh_D12G2570	66.2461	8.47447	2.9666	9.6039e-11	1.1801e-09	33.8394	4.92197	2.7814	5.2999e-06	6.7099e-05		2.9666	2.7814
Gh_D12G2605	180.462	385.315	-1.0943	2.8999e-09	3.0601e-08	9.26827	85.7904	-3.2104	1.6326e-15	6.0323e-14		-1.0943	-3.2104
Gh_D12G2638	195.9	38.7986	2.336	8.24e-22	2.3109e-20	94.4673	30.3147	1.6398	1.1297e-07	1.8667e-06		2.336	1.6398
Gh_D12G2669	2278.22	327.079	2.8002	1.3904e-242	1.8901e-239	252.785	72.4323	1.8032	8.6786e-21	4.5681e-19		2.8002	1.8032
Gh_D12G2675	178.648	77.0133	1.2139	3.1129e-08	2.9093e-07	115.27	53.7238	1.1014	1.9115e-05	0.00021532		1.2139	1.1014
Gh_D12G2767	664.454	252.76	1.3944	5.0195e-31	2.248e-29	354.661	30.4867	3.5402	6.9507e-66	1.9648e-63		1.3944	3.5402
Gh_D13G0247	89.7081	259.99	-1.5351	4.4291e-14	7.2522e-13	32.646	107.718	-1.7223	3.3557e-09	6.8277e-08		-1.5351	-1.7223
Gh_D13G0415	745.682	234.272	1.6704	5.0967e-23	1.525e-21	193.708	51.3612	1.9151	8.2839e-18	3.6197e-16		1.6704	1.9151
Gh_D13G0513	107.827	250.065	-1.2136	1.405e-10	1.6969e-09	349.752	762.041	-1.1235	1.2117e-21	6.7177e-20		-1.2136	-1.1235
Gh_D13G0630	150.829	58.3956	1.369	1.1828e-08	1.1616e-07	25.6478	7.30922	1.811	0.0034053	0.020567		1.369	1.811
Gh_D13G0670	986.279	172.68	2.5139	2.7591e-103	6.783e-101	687.326	140.346	2.292	6.5701e-73	2.2015e-70		2.5139	2.292
Gh_D13G0877	166.148	23.2001	2.8403	1.4522e-23	4.4705e-22	162.018	2.43641	6.0553	2.1424e-34	2.1297e-32		2.8403	6.0553
Gh_D13G0878	232.197	3.12559	6.2151	3.066e-64	3.8788e-62	338.823	11.2763	4.9092	1.2839e-83	5.4438e-81		6.2151	4.9092
Gh_D13G0888	232.71	93.573	1.3144	2.2652e-11	2.9458e-10	151.323	75.3953	1.0051	5.5309e-06	6.9774e-05		1.3144	1.0051
Gh_D13G0997	395.979	97.8959	2.0161	3.922e-31	1.7644e-29	83.1096	22.1243	1.9094	2.4992e-08	4.5307e-07		2.0161	1.9094
Gh_D13G1015	40.8124	120.807	-1.5656	3.7121e-08	3.4318e-07	19.7336	57.6909	-1.5477	5.5761e-05	0.00056426		-1.5656	-1.5477
Gh_D13G1298	365.3	134.046	1.4463	2.8191e-19	6.7394e-18	397.396	67.082	2.5666	9.3682e-25	6.0422e-23		1.4463	2.5666
Gh_D13G1529	32.019	96.51	-1.5918	6.16e-07	4.8507e-06	23.1369	54.0188	-1.2233	0.0017831	0.011932		-1.5918	-1.2233
Gh_D13G1562	358.913	134.117	1.4201	8.7947e-19	2.0371e-17	238.017	99.2573	1.2618	6.7869e-12	1.8182e-10		1.4201	1.2618
Gh_D13G1688	57.7486	347.654	-2.5898	3.7922e-40	2.4054e-38	117.841	275.525	-1.2253	6.138e-13	1.822e-11		-2.5898	-1.2253
Gh_D13G1700	101.026	20.2043	2.322	6.429e-12	8.7721e-11	109.469	48.2261	1.1826	9.8823e-06	0.00011834		2.322	1.1826
Gh_D13G1759	346.61	89.1325	1.9593	6.0883e-29	2.4873e-27	61.7647	18.9401	1.7053	1.4376e-05	0.00016681		1.9593	1.7053
Gh_D13G1929	136.337	606.636	-2.1537	1.2142e-52	1.112e-50	47.3504	208.285	-2.1371	1.2343e-21	6.8372e-20		-2.1537	-2.1371
Gh_D13G1963	65.8127	219.641	-1.7387	1.6133e-15	2.955e-14	21.9435	52.3161	-1.2535	0.0013718	0.0095247		-1.7387	-1.2535
Gh_D13G2027	197.339	35.5433	2.473	1.3984e-23	4.3146e-22	143.553	56.5535	1.3439	1.744e-08	3.2272e-07		2.473	1.3439
Gh_D13G2095	179.318	365.111	-1.0258	6.6644e-08	5.967e-07	151.553	374.062	-1.3035	3.3669e-18	1.5067e-16		-1.0258	-1.3035
Gh_D13G2211	197.398	92.3523	1.0959	1.0444e-07	9.1332e-07	300.429	141.069	1.0906	6.7769e-12	1.817e-10		1.0959	1.0906
Gh_D13G2217	37.4607	75.2736	-1.0068	0.0024235	0.0096805	10.1642	40.9906	-2.0118	5.3674e-05	0.00054579		-1.0068	-2.0118
Gh_D13G2340	809.701	2547.41	-1.6536	4.0724e-117	1.2066e-114	327.88	802.646	-1.2916	3.8745e-36	4.139e-34		-1.6536	-1.2916
Gh_D13G2394	19.9921	210.382	-3.3955	2.1322e-34	1.1064e-32	82.0858	210.795	-1.3606	8.6624e-12	2.3009e-10		-3.3955	-1.3606
Gh_D13G2430	3.2729	56.6499	-4.1134	5.6938e-12	7.8012e-11	3.04927	39.2283	-3.6854	1.187e-08	2.2394e-07		-4.1134	-3.6854
Gh_D13G2447	1213.88	576.471	1.0743	1.2338e-33	6.1892e-32	271.254	64.119	2.0808	4.7443e-27	3.4268e-25		1.0743	2.0808
Gh_D13G2511	16.4039	0	Inf	8.103e-06	5.3835e-05	17.7573	1.45693	3.6074	0.00021746	0.0019153		Inf	3.6074
Gh_D13G2518	1160.79	461.968	1.3292	2.4391e-46	1.8747e-44	170.394	81.1984	1.0694	3.7401e-07	5.7474e-06		1.3292	1.0694
Gh_Sca004734G04	21.5891	59.9052	-1.4724	0.0002333	0.0011824	14.5876	89.3642	-2.615	8.2665e-13	2.4276e-11		-1.4724	-2.615
Gh_Sca004922G01	295.544	109.655	1.4304	1.4435e-09	1.5728e-08	18.115	63.9961	-1.8208	2.6516e-06	3.5567e-05		1.4304	-1.8208
Gh_Sca005084G01	2.74055	17.2379	-2.653	0.0036461	0.013883	1.4343	33.3514	-4.5393	1.286e-08	2.4168e-07		-2.653	-4.5393
Gh_Sca005105G01	20.3668	111.106	-2.4476	3.3603e-13	5.1256e-12	37.6077	75.7007	-1.0093	0.0012546	0.0088143		-2.4476	-1.0093
Gh_Sca005242G01	702.841	313.467	1.1649	1.6747e-24	5.4279e-23	209.203	104.362	1.0033	1.3182e-07	2.1605e-06		1.1649	1.0033
Gh_Sca005409G01	365.615	3.41453	6.7425	1.3195e-102	3.2098e-100	269.518	34.5626	2.9631	1.1551e-41	1.52e-39		6.7425	2.9631
Gh_Sca005423G01	179.141	35.5078	2.3349	5.2698e-19	1.2397e-17	150.672	11.2517	3.7432	1.6816e-30	1.4138e-28		2.3349	3.7432
Gh_Sca007014G01	238.94	7.08859	5.075	2.1689e-58	2.3169e-56	25.8887	4.49368	2.5264	0.00019349	0.001727		5.075	2.5264
Gh_Sca007246G01	85.0553	0	Inf	1.2349e-27	4.7143e-26	65.1643	0.477449	7.0926	3.8939e-15	1.396e-13		Inf	7.0926
Gh_Sca009869G01	1735.49	443.356	1.9688	9.3602e-92	2.0029e-89	467.085	183.443	1.3483	1.195e-10	2.86e-09		1.9688	1.3483
Gh_Sca010764G01	1027.29	157.459	2.7058	7.2392e-120	2.3128e-117	282.51	65.748	2.1033	1.25e-20	6.5196e-19		2.7058	2.1033
Gh_Sca011769G01	35.4889	98.9573	-1.4794	1.5765e-06	1.174e-05	13.0329	37.8943	-1.5398	0.0037615	0.022351		-1.4794	-1.5398
Gh_Sca014110G01	527.189	24.5566	4.4241	7.598e-112	2.124e-109	104.628	4.37078	4.5812	1.0936e-25	7.3867e-24		4.4241	4.5812
Gh_Sca017354G01	228.568	45.1087	2.3412	5.8363e-15	1.0251e-13	25.8887	7.35838	1.8149	0.0033287	0.020195		2.3412	1.8149
Gh_Sca024892G01	118.514	27.5169	2.1067	5.7787e-12	7.9082e-11	14.9489	1.95896	2.9319	0.0029302	0.018133		2.1067	2.9319
Gh_Sca034384G01	1.1041	12.697	-3.5235	0.0045845	0.017003	0	15.2188	#NAME?	2.0866e-05	0.00023306		-3.5235	#NAME?
Gh_Sca057285G01	31.7431	1.67482	4.2444	1.3475e-07	1.1632e-06	40.4161	0.979479	5.3668	1.1858e-11	3.1207e-10		4.2444	5.3668
Gh_Sca068087G01	822.32	224.559	1.8726	8.0437e-58	8.5138e-56	99.542	44.7506	1.1534	0.00015778	0.0014412		1.8726	1.1534
Novel00111	70.5049	19.8859	1.826	9.9376e-07	7.5993e-06	33.1241	2.93844	3.4948	3.5145e-07	5.4177e-06		1.826	3.4948
Novel00128	165.142	19.302	3.0969	4.5394e-26	1.5927e-24	19.8504	3.01218	2.7203	0.00071788	0.0054319		3.0969	2.7203
Novel00454	574.449	96.7574	2.5697	4.7312e-65	6.1424e-63	187.493	42.2405	2.1501	3.8738e-20	1.9623e-18		2.5697	2.1501
Novel00730	112.224	6.79965	4.0448	6.5212e-24	2.042e-22	181.037	11.3009	4.0018	6.4513e-39	7.6535e-37		4.0448	4.0018
Novel00777	226.577	77.0488	1.5562	3.0918e-14	5.1344e-13	33.0639	8.79073	1.9112	0.00054479	0.0042811		1.5562	1.9112
Novel01045	159.05	433.201	-1.4456	6.6831e-20	1.6684e-18	46.5146	105.843	-1.1862	3.2353e-05	0.00034519		-1.4456	-1.1862
Novel01203	11.534	42.1838	-1.8708	0.00027095	0.0013549	50.3431	108.171	-1.1034	3.2108e-05	0.00034295		-1.8708	-1.1034
Novel01211	74.8425	28.0005	1.4184	5.4369e-05	0.00031234	46.4581	17.1777	1.4354	0.00092084	0.0067426		1.4184	1.4354
Novel01212	79.5742	39.6361	1.0055	0.0016455	0.0068618	46.2098	7.88499	2.551	0.0042894	0.024936		1.0055	2.551
Novel01232	3.2729	51.6254	-3.9794	1.1419e-10	1.3918e-09	1.01642	22.6017	-4.4749	3.8216e-06	4.9745e-05		-3.9794	-4.4749
Novel01269	467.845	106.329	2.1375	1.1691e-20	3.0494e-19	22.0037	4.37078	2.3318	0.0014657	0.01008		2.1375	2.3318
Novel01470	545.741	37.0589	3.8803	2.2736e-29	9.45e-28	0	65.8813	#NAME?	1.1382e-21	6.3256e-20		3.8803	#NAME?
Novel01522	102.09	43.5048	1.2306	1.7862e-05	0.00011177	87.1716	43.1462	1.0146	0.00052725	0.0041638		1.2306	1.0146
Novel01595	207.118	75.5038	1.4558	4.5667e-12	6.3181e-11	62.1187	26.323	1.2387	0.00058507	0.0045457		1.4558	1.2387
Novel01971	192.489	60.0289	1.681	1.4574e-13	2.2916e-12	1716.74	429.331	1.9995	8.2301e-130	7.5377e-127		1.681	1.9995
Novel02108	50.1381	121.32	-1.2748	2.6102e-06	1.8791e-05	42.8066	136.074	-1.6685	1.2243e-10	2.9232e-09		-1.2748	-1.6685
Novel02285	185.352	84.7802	1.1285	1.1003e-07	9.5966e-07	127.772	18.5855	2.7813	4.0915e-19	1.9436e-17		1.1285	2.7813
Novel02559	161.652	48.0984	1.7488	0.0049303	0.018101	140.918	35.7141	1.9803	6.0972e-14	1.9737e-12		1.7488	1.9803
Novel02776	55.0869	283.126	-2.3617	2.193e-29	9.1258e-28	389.464	805.201	-1.0479	3.3566e-26	2.3243e-24		-2.3617	-1.0479
Novel02896	23.3044	4.44659	2.3898	0.0011945	0.0051553	30.0712	1.45693	4.3674	6.5331e-08	1.118e-06		2.3898	4.3674
Novel03067	4.49522	43.5696	-3.2769	7.4057e-08	6.5841e-07	3.04927	20.1899	-2.7271	0.00074546	0.0056153		-3.2769	-2.7271
Novel03068	28.6278	211.65	-2.8862	1.1702e-28	4.7005e-27	0	42.6442	#NAME?	3.4243e-14	1.1292e-12		-2.8862	#NAME?
Novel03296	1115.22	74.9847	3.8946	1.706e-196	1.408e-193	80.5311	32.8002	1.2958	3.9829e-05	0.00041724		3.8946	1.2958
Novel03307	3.19409	19.2371	-2.5904	0.0028243	0.011093	6.51643	28.4295	-2.1252	0.00061429	0.0047421		-2.5904	-2.1252
Novel03486	67.1532	16.9489	1.9863	6.6549e-07	5.2115e-06	47.2939	13.1861	1.8426	4.9421e-05	0.00050675		1.9863	1.8426
Novel03592	18.0798	75.7278	-2.0664	1.1173e-07	9.7274e-07	4.0657	53.3939	-3.7151	1.7647e-11	4.5726e-10		-2.0664	-3.7151
Novel03665	161.988	40.1491	2.0124	6.0114e-15	1.0545e-13	238.133	16.5528	3.8466	1.2193e-48	2.1257e-46		2.0124	3.8466
Novel03934	203.904	80.4339	1.342	1.1441e-10	1.3937e-09	28.3997	3.3913	3.066	1.2721e-05	0.00014896		1.342	3.066
Novel03986	60.371	26.4555	1.1903	0.0015282	0.0064279	27.3832	7.76209	1.8188	0.0026059	0.01641		1.1903	1.8188
Novel04148	107.078	20.9474	2.3538	5.7429e-07	4.5424e-06	250.161	49.9534	2.3242	9.5185e-29	7.4894e-27		2.3538	2.3242
Novel04244	8.26106	28.6139	-1.7923	0.0035802	0.013668	2.92883	25.4173	-3.1174	4.07e-05	0.00042481		-1.7923	-3.1174
Novel04622	34.7201	72.8912	-1.07	0.0017772	0.0073532	62.7774	132.486	-1.0775	6.8537e-06	8.4703e-05		-1.07	-1.0775
Novel04715	66.9562	429.155	-2.6802	1.2322e-50	1.0625e-48	7.23542	98.5482	-3.7677	1.4843e-20	7.7004e-19		-2.6802	-3.7677
Novel04737	37.1253	84.7508	-1.1908	0.00021171	0.0010826	5.74089	24.487	-2.0927	0.0013812	0.0095842		-1.1908	-2.0927
Novel04827	75.1972	29.9349	1.3289	0.00012758	0.00068289	15.8449	1.45693	3.443	0.00074002	0.0055792		1.3289	3.443
Novel04847	23.1861	190.903	-3.0415	5.917e-20	1.4831e-18	11.719	91.5444	-2.9656	4.1331e-15	1.4787e-13		-3.0415	-2.9656
Novel04926	2.24761	30.9669	-3.7843	1.1884e-06	8.9918e-06	126.451	423.117	-1.7425	6.5087e-11	1.6019e-09		-3.7843	-1.7425
Novel04936	37.796	162.537	-2.1045	2.6092e-15	4.6923e-14	145.048	366.093	-1.3357	7.9318e-19	3.7089e-17		-2.1045	-1.3357
Novel04939	686.81	2787.62	-2.021	6.6143e-46	5.0061e-44	7.4124	170.05	-4.5199	1.1664e-39	1.4256e-37		-2.021	-4.5199
Novel04958	35.8636	11.4703	1.6446	0.0020496	0.0083388	163.697	48.4719	1.7558	1.2814e-13	4.047e-12		1.6446	1.7558
Novel05188	25.2761	92.7771	-1.876	4.3385e-08	3.9785e-07	21.5858	48.5211	-1.1685	0.0034932	0.02101		-1.876	-1.1685
Novel05509	43.8488	124.799	-1.509	5.6983e-08	5.1478e-07	26.8449	75.0161	-1.4826	1.3082e-05	0.00015279		-1.509	-1.4826
Novel05649	299.725	62.8362	2.254	1.5792e-30	6.9338e-29	93.5074	40.2078	1.2176	2.683e-05	0.00029156		2.254	1.2176
Novel05664	110.667	228.044	-1.0431	5.6776e-08	5.1305e-07	0	17.5815	#NAME?	3.5114e-06	4.5986e-05		-1.0431	#NAME?
Novel05683	0	47.851	#NAME?	1.7783e-14	3.0054e-13	0	36.2899	#NAME?	3.72e-12	1.0242e-10		#NAME?	#NAME?
Novel05684	0	21.8791	#NAME?	6.3005e-07	4.9563e-06	0	25.8947	#NAME?	7.5637e-09	1.4706e-07		#NAME?	#NAME?
Novel05880	83.9118	24.8455	1.7559	3.3513e-07	2.7395e-06	100.325	27.7308	1.8551	2.0321e-09	4.2363e-08		1.7559	1.8551
Novel06044	184.346	90.0348	1.0339	9.0329e-07	6.9512e-06	90.4581	42.3984	1.0932	0.00017647	0.0015929		1.0339	1.0932
Novel06117	21.9638	3.73894	2.5544	0.00073642	0.0033468	27.9216	3.46505	3.0104	1.6671e-05	0.00019034		2.5544	3.0104
Novel06225	247.555	111.342	1.1528	1.1456e-08	1.1274e-07	49.865	21.5731	1.2088	0.0027257	0.017043		1.1528	1.2088
Novel06281	10.4299	66.5751	-2.6743	3.1271e-09	3.2877e-08	3.88503	62.5146	-4.0082	5.952e-14	1.9285e-12		-2.6743	-4.0082
Novel07099	184.917	88.7726	1.0587	6.9129e-07	5.4025e-06	25.3504	6.42806	1.9796	0.0018606	0.012374		1.0587	1.9796
Novel07382	23.8761	116.101	-2.2817	1.0158e-12	1.486e-11	18.2354	42.9987	-1.2376	0.0045066	0.02598		-2.2817	-1.2376
Novel07640	22.575	59.4571	-1.3971	0.00051629	0.002426	0	16.1491	#NAME?	1.0274e-05	0.00012246		-1.3971	#NAME?
Novel07720	122.299	48.2403	1.3421	6.6829e-07	5.2328e-06	41.9708	10.3214	2.0237	3.8007e-05	0.00040054		1.3421	2.0237
Novel07747	67.3108	2.22329	4.9201	3.7677e-17	7.7716e-16	43.5858	18.5609	1.2316	0.0044951	0.025932		4.9201	1.2316
Novel07780	83.6753	38.0201	1.138	0.00041082	0.0019762	29.7738	9.81937	1.6003	0.003811	0.022599		1.138	1.6003
Novel08113	297.24	145.971	1.0259	1.0332e-09	1.1424e-08	130.991	41.5664	1.656	2.1306e-10	4.9526e-09		1.0259	1.656
Novel08223	277.84	75.7866	1.8742	5.7894e-22	1.6356e-20	79.2172	28.9806	1.4507	8.304e-06	0.00010087		1.8742	1.4507
Novel08413	147.673	814.7	-2.4639	1.5067e-82	2.7854e-80	62.8979	153.385	-1.2861	1.9529e-08	3.5878e-07		-2.4639	-1.2861

## Sheet: Supplementary Data 3
Supplementary Data S3 -174 transcription factors in Gh_VIGSvsGh_WT_Gb_VIGSvsGb_WT.venn.
G.hirsutum gene ID	Arabidopsis ID	Anno	readcount_Gh_VIGS	readcount_Gh_WT	log2FoldChange	pval	padj	readcount_Gb_VIGS	readcount_Gb_WT	log2FoldChange	pval	padj
Gh_A01G0439	AT5G53980	HB	96.5498	236.041	-1.2897	5.0961e-11	6.419e-10	119.69	13.1369	3.1876	1.78e-17	7.6e-16
Gh_A01G0526	AT4G21440	MYB	151.637	10.5031	3.8517	7.12e-30	3.04e-28	47.3504	21.1202	1.1648	0.0040631	0.023819
Gh_A01G0998	AT1G46480	HB	27.1096	118.655	-2.1299	1.2787e-10	1.5507e-09	61.9417	165.714	-1.4197	2.6839e-10	6.1802e-09
Gh_A01G1564	AT1G68320	MYB	728.373	270.523	1.4289	5.37e-35	2.86e-33	279.931	15.77	4.1498	5.73e-61	1.39e-58
Gh_A01G1608	AT5G20240	MADS	101.873	0	Inf	5.14e-33	2.51e-31	111.442	0	Inf	7.5e-37	8.27e-35
Gh_A02G0736	AT5G20240	MADS	91.6799	0	Inf	9.87e-30	4.15e-28	79.1005	0	Inf	2.92e-26	2.04e-24
Gh_A02G1512	AT5G61890	AP2-EREBP	3.31231	20.6879	-2.6429	0.0014464	0.0061204	8.07118	78.5408	-3.2826	1.51e-14	5.14e-13
Gh_A02G1563	AT4G36740	HB	173.009	37.5071	2.2056	8.17e-18	1.77e-16	49.6844	18.7084	1.4091	0.00063295	0.0048648
Gh_A02G1617	AT3G54340	MADS	35.1342	0.418706	6.3908	1.0331e-10	1.2657e-09	31.7464	1.9098	4.0551	8.3869e-08	1.413e-06
Gh_A02G1818	AT2G24650	ABI3VP1	49.4675	9.99012	2.3079	0.00013648	0.000727	90.0968	27.3271	1.7211	6.2469e-08	1.0727e-06
Gh_A03G0263	AT2G27990	HB	409.444	943.097	-1.2037	1.7e-32	8.17e-31	137.925	394.814	-1.5173	4.28e-24	2.68e-22
Gh_A03G0887	AT1G69490	NAC	445.802	111.525	1.999	4.44e-37	2.56e-35	211.168	35.4929	2.5728	6.14e-28	4.64e-26
Gh_A03G1085	AT1G24260	MADS	103.371	1.38588	6.2209	1.52e-29	6.33e-28	59.2501	1.00406	5.8829	1.86e-17	7.94e-16
Gh_A03G1284	AT3G01470	HB	164.472	354.749	-1.109	1.4e-12	2.0276e-11	304.8	144.682	1.075	9.646e-12	2.5523e-10
Gh_A03G1598	AT1G10200	LIM	64.255	208.33	-1.697	2.32e-14	3.89e-13	48.1296	122.238	-1.3447	2.1872e-07	3.4617e-06
Gh_A03G1731	AT1G75390	bZIP	67.6856	177.899	-1.3941	9.2065e-10	1.0224e-08	74.0183	180.737	-1.2879	1.0659e-09	2.2837e-08
Gh_A04G1264	AT1G69120	MADS	138.782	0.902294	7.265	5.85e-25	1.94e-23	299.661	6.3789	5.5539	2.05e-80	8.06e-78
Gh_A04G1265	AT2G03710	MADS	170.032	69.2465	1.296	1.5414e-08	1.4931e-07	407.221	39.632	3.3611	7.17e-71	2.32e-68
Gh_A04G1303	AT4G27410	NAC	838.744	256.859	1.7073	6.3e-52	5.63e-50	613.68	201.334	1.6079	2.55e-25	1.68e-23
Gh_A05G0260	AT1G19180	Tify	516.464	197.691	1.3854	1.23e-24	4.01e-23	229.106	701.942	-1.6153	6.7e-45	9.92e-43
Gh_A05G1082	AT5G11590	AP2-EREBP	36.3566	73.245	-1.0105	0.0028095	0.011043	31.1478	71.1474	-1.1917	0.00042916	0.0034709
Gh_A05G1334	AT2G33880	HB	102.484	38.8281	1.4002	2.7174e-06	1.9498e-05	76.4691	17.2515	2.1482	4.898e-09	9.7463e-08
Gh_A05G1684	AT1G65910	NAC	2038.84	572.502	1.8324	6.02e-119	1.88e-116	668.127	235.036	1.5072	5.33e-39	6.34e-37
Gh_A05G1768	AT1G46480	HB	108.064	354.277	-1.713	1.67e-22	4.88e-21	152.882	314.767	-1.0419	1.6906e-11	4.3873e-10
Gh_A05G1797	AT1G22130	MADS	565.184	131.44	2.1043	2.24e-26	7.99e-25	116.528	14.7659	2.9803	3.95e-19	1.88e-17
Gh_A05G2069	AT5G50080	AP2-EREBP	165.261	19.1074	3.1125	4.58e-26	1.61e-24	96.0823	23.9358	2.0051	5.3935e-10	1.1994e-08
Gh_A05G2210	AT1G75250	MYB	155.087	4.44659	5.1242	5.41e-39	3.31e-37	258.112	54.8508	2.2344	3.74e-28	2.85e-26
Gh_A05G3105	AT3G27650	LOB	68.612	174.844	-1.3495	3.3319e-09	3.4903e-08	41.3723	13.1369	1.655	0.00045279	0.0036415
Gh_A05G3751	AT1G21910	AP2-EREBP	28.9238	97.9547	-1.7599	2.0081e-07	1.6945e-06	209.493	71.2703	1.5555	1.75e-14	5.91e-13
Gh_A06G0188	AT4G37260	MYB	2463.87	1181.31	1.0605	1.7967e-07	1.5261e-06	1863.86	771.113	1.2733	1.9e-06	2.6129e-05
Gh_A06G0568	AT5G11590	AP2-EREBP	1.14351	32.5181	-4.8297	1.926e-05	0.00011974	3.46715	17.6306	-2.3463	0.0048362	0.027525
Gh_A06G1110	AT5G60200	C2C2-Dof	32.1372	105.562	-1.7158	2.8181e-08	2.6492e-07	57.6351	18.231	1.6606	2.6145e-05	0.0002851
Gh_A06G1188	AT5G07100	WRKY	21.7467	0	Inf	1.3831e-05	8.8384e-05	0.478101	10.2968	-4.4287	0.0035667	0.021369
Gh_A07G0115	AT2G26150	HSF	186.12	83.3294	1.1593	5.795e-08	5.2271e-07	13.5712	73.8154	-2.4434	5.3992e-10	1.2002e-08
Gh_A07G0317	AT4G32280	AUX/IAA	188.131	436.491	-1.2142	2.37e-17	4.96e-16	162.206	57.7155	1.4908	9.2555e-11	2.2449e-09
Gh_A07G0377	AT5G07580	AP2-EREBP	61.7509	9.18212	2.7496	3.331e-09	3.49e-08	60.4472	225.93	-1.9021	4.3e-20	2.17e-18
Gh_A07G0722	AT1G26310	MADS	185.45	39.1525	2.2439	1.41e-19	3.45e-18	108.4	18.1572	2.5777	4.22e-15	1.51e-13
Gh_A07G1339	AT2G45650	MADS	26.5773	0.418706	5.9881	4.9217e-08	4.4843e-07	47.1132	0.477449	6.6246	1.21e-14	4.14e-13
Gh_A07G1615	AT3G02310	MADS	102.327	2.28818	5.4828	1.73e-27	6.57e-26	105.768	6.90551	3.937	6.06e-23	3.6e-21
Gh_A07G1875	AT3G28880	C3H	14.3533	0.418706	5.0993	0.00022588	0.0011485	30.9708	1.95896	3.9828	1.5148e-07	2.4593e-06
Gh_A07G1951	AT3G54220	GRAS	18.1192	77.1431	-2.09	5.7855e-08	5.2192e-07	10.7628	38.6034	-1.8427	0.00022447	0.0019699
Gh_A07G2245	AT3G23240	AP2-EREBP	16.0686	0.967176	4.0543	0.00025073	0.0012629	39.2227	0.954898	5.3602	3.1984e-11	8.1219e-10
Gh_A08G0656	AT5G62000	ARF	144.538	62.3526	1.2129	2.9014e-06	2.073e-05	32.2847	5.90145	2.4517	4.0926e-05	0.00042691
Gh_A08G0834	AT5G53420	Orphans	99.2116	216.804	-1.1278	1.7602e-08	1.693e-07	23.5584	59.2462	-1.3305	0.00033535	0.0028064
Gh_A08G0907	AT2G46680	HB	59.7003	6.38094	3.2259	8.6781e-11	1.07e-09	52.7902	1.50609	5.1314	1.11e-14	3.82e-13
Gh_A08G0909	AT3G61890	HB	123.581	17.9161	2.7861	1.31e-17	2.81e-16	55.6662	6.83177	3.0265	7.8672e-10	1.7183e-08
Gh_A08G0962	AT1G32640	bHLH	206.881	42.4078	2.2864	3.2e-22	9.18e-21	137.323	64.7193	1.0853	0.0023453	0.015032
Gh_A08G1075	AT1G09540	MYB	17.705	103.498	-2.5474	4.43e-13	6.69e-12	32.2847	76.0448	-1.236	0.00016116	0.0014686
Gh_A08G1148	AT2G45650	MADS	20.6627	0	Inf	0.00028963	0.00144	16.0821	0	Inf	8.3663e-06	0.00010153
Gh_A08G2176	AT2G19810	C3H	264.295	671.117	-1.3444	5.52e-29	2.26e-27	166.98	338.91	-1.0212	1.17e-11	3.0803e-10
Gh_A09G0477	AT1G18400	bHLH	71.096	210.936	-1.569	2.63e-13	4.06e-12	96.6771	31.4416	1.6205	8.5477e-08	1.4384e-06
Gh_A09G1177	AT3G12160	bHLH	373.029	163.085	1.1937	7.22e-15	1.26e-13	112.883	231.462	-1.0359	7.9111e-09	1.5338e-07
Gh_A09G1704	AT1G64380	AP2-EREBP	14.9251	72.9915	-2.29	2.1439e-08	2.043e-07	50.3431	162.004	-1.6862	2.2898e-09	4.7504e-08
Gh_A09G2077	AT3G16770	AP2-EREBP	679.438	281.221	1.2726	1.41e-27	5.38e-26	199.931	38.7263	2.3681	4.63e-24	2.89e-22
Gh_A09G2157	AT3G02310	MADS	36.1395	0.902294	5.3238	6.6027e-08	5.9156e-07	29.1752	0.502029	5.8608	4.8376e-09	9.6373e-08
Gh_A09G2173	AT1G66350	GRAS	13.2492	48.8831	-1.8834	6.3676e-05	0.00036069	78.261	37.1219	1.076	0.00055785	0.0043643
Gh_A10G2220	AT4G18960	MADS	117.074	38.0261	1.6224	1.3097e-08	1.2794e-07	40.8377	9.69646	2.0744	4.6816e-05	0.0004822
Gh_A11G0080	AT5G51990	AP2-EREBP	139.59	282.182	-1.0154	3.1778e-09	3.3375e-08	131.83	298.506	-1.1791	4.42e-13	1.33e-11
Gh_A11G0082	AT5G52020	AP2-EREBP	63.1903	191.9	-1.6026	2.63e-12	3.7226e-11	125.194	704.028	-2.4915	3.07e-41	3.96e-39
Gh_A11G0359	AT5G61890	AP2-EREBP	38.683	6.89394	2.4883	1.6304e-05	0.00010271	2.57117	20.1162	-2.9679	0.00036797	0.0030409
Gh_A11G0482	AT1G34370	C2H2	35.7848	7.63706	2.2283	8.9677e-05	0.00049452	3.52738	23.5566	-2.7395	0.00023925	0.0020821
Gh_A11G0633	AT5G61430	NAC	567.292	137.343	2.0463	4.92e-48	3.93e-46	346.944	24.487	3.8246	1.23e-69	3.82e-67
Gh_A11G0754	AT2G45650	MADS	43.8488	0.483588	6.5026	1.96e-13	3.06e-12	53.3322	4.37078	3.609	3.1363e-11	7.97e-10
Gh_A11G0868	AT2G46400	WRKY	182.611	77.208	1.242	1.122e-08	1.1054e-07	154.617	440.263	-1.5097	8.88e-27	6.34e-25
Gh_A11G0891	AT2G28500	LOB	187.343	18.3997	3.3479	6.33e-32	2.96e-30	25.1095	7.30922	1.7804	0.0042025	0.024509
Gh_A11G0906	AT2G46680	HB	559.682	201.117	1.4766	1.85e-29	7.71e-28	237.953	62.49	1.929	1.35e-21	7.47e-20
Gh_A11G0926	AT1G01060	MYB	1731.08	7876.17	-2.1858	0	0	761.656	87.0998	3.1284	5.78e-115	4.46e-112
Gh_A11G1721	AT4G36740	HB	421.925	200.745	1.0716	7.01e-14	1.13e-12	108.276	40.5623	1.4165	3.6491e-07	5.615e-06
Gh_A11G2168	AT3G04070	NAC	860.768	211.679	2.0237	1.96e-59	2.18e-57	264.44	56.5148	2.2262	1.04e-28	8.13e-27
Gh_A11G2876	AT4G35550	HB	28.1743	66.7049	-1.2434	0.000707	0.0032238	16.4398	2.43641	2.7544	0.0020585	0.013471
Gh_A11G2970	AT4G16780	HB	247.063	1294.86	-2.3898	2.39e-117	7.14e-115	319.331	765.889	-1.2621	1.67e-33	1.61e-31
Gh_A11G2997	AT4G17900	PLATZ	3667	1120.55	1.7104	3.3e-163	1.68e-160	519.035	215.102	1.2708	1.963e-12	5.5284e-11
Gh_A12G0118	AT5G64530	NAC	504.891	109.82	2.2008	1.11e-47	8.83e-46	193.414	46.2076	2.0655	1.23e-19	6.04e-18
Gh_A12G0216	AT4G34410	AP2-EREBP	6.21048	45.3033	-2.8668	2.5518e-07	2.121e-06	111.445	710.024	-2.6715	5.17e-91	2.54e-88
Gh_A12G0570	AT3G54340	MADS	28.6673	6.66988	2.1037	0.00088941	0.0039684	46.2811	1.00406	5.5265	2.6282e-07	4.1245e-06
Gh_A12G1020	AT3G13540	MYB	16.6797	66.2213	-1.9892	1.1338e-06	8.6054e-06	53.3924	20.067	1.4118	0.00042884	0.0034692
Gh_A12G1061	AT1G01060	MYB	1660.75	7207.7	-2.1177	0	0	884.154	195.295	2.1786	7.71e-86	3.51e-83
Gh_A12G1505	AT1G69490	NAC	287.186	78.9183	1.8636	7.97e-23	2.36e-21	203.104	11.8029	4.105	2.69e-44	3.94e-42
Gh_A12G1695	AT3G48360	TAZ	107.256	0.837412	7.0009	8.27e-32	3.83e-30	14.4672	44.4065	-1.618	0.00040552	0.0033027
Gh_A13G0040	AT2G40470	LOB	141.483	4.02788	5.1345	1.12e-35	6.13e-34	19.2518	1.98354	3.2788	0.00021557	0.001901
Gh_A13G0196	AT1G49900	C2H2	64.2744	22.2978	1.5273	8.003e-05	0.00044479	65.8906	22.5034	1.5499	2.6242e-05	0.00028603
Gh_A13G0442	AT2G22540	MADS	79.4954	9.247	3.1038	3.54e-13	5.393e-12	8.6095	29.8126	-1.7919	0.00175	0.011735
Gh_A13G0751	AT1G69120	MADS	265.852	2.28818	6.8603	1.47e-76	2.44e-74	517.955	9.74562	5.7319	8.99e-139	9.5e-136
Gh_A13G1439	AT3G04070	NAC	155.915	28.0066	2.4769	3.35e-19	7.96e-18	101.94	13.7864	2.8864	2.56e-16	1e-14
Gh_D01G1815	AT1G68320	MYB	1013.94	228.976	2.1467	4.95e-85	9.43e-83	300.915	26.4213	3.5096	1.32e-55	2.77e-53
Gh_D02G0043	AT4G26640	WRKY	165.793	53.8781	1.6216	1.66e-11	2.1818e-10	320.223	915.391	-1.5153	5.75e-52	1.11e-49
Gh_D02G0122	AT1G33060	NAC	56.4668	14.6313	1.9483	5.9572e-06	4.0435e-05	71.929	26.948	1.4164	4.0619e-05	0.0004242
Gh_D02G0481	AT4G13480	MYB	47.4764	3.47941	3.7703	5.1612e-10	5.8755e-09	17.0383	2.88927	2.56	0.0029119	0.018033
Gh_D02G0505	AT2G47900	TUB	34.8777	3.60918	3.2726	8.1317e-07	6.2926e-06	80.1771	36.2653	1.1446	0.00024435	0.002123
Gh_D02G0698	AT5G64750	AP2-EREBP	18.888	3.60918	2.3877	0.0036709	0.013968	36.4708	8.83989	2.0446	0.00011863	0.0011185
Gh_D02G0779	AT5G20240	MADS	85.114	0	Inf	5.1748e-11	6.5146e-10	81.3742	0	Inf	5.99e-27	4.3e-25
Gh_D02G1270	AT1G69490	NAC	373.719	47.2731	2.9829	1.95e-53	1.83e-51	135.666	46.1934	1.5543	4.5308e-06	5.8096e-05
Gh_D02G1311	AT1G69120	MADS	78.2336	26.0013	1.5892	7.2431e-06	4.8507e-05	298.949	20.5936	3.8596	1.48e-60	3.55e-58
Gh_D02G1502	AT1G24260	MADS	64.8662	0	Inf	2.7e-21	7.31e-20	48.4234	0.477449	6.6642	1.0932e-08	2.076e-07
Gh_D02G2025	AT1G49900	C2H2	550.317	250.826	1.1336	3.78e-19	8.94e-18	344.022	724.568	-1.0746	9.28e-25	5.99e-23
Gh_D02G2389	AT4G14550	AUX/IAA	54.3969	211.089	-1.9563	8.58e-18	1.86e-16	63.3158	133.844	-1.0799	5.6881e-06	7.1481e-05
Gh_D02G2435	AT1G10200	LIM	136.219	411.487	-1.5949	2.03e-24	6.52e-23	134.646	306.798	-1.1881	1.32e-13	4.15e-12
Gh_D03G0105	AT3G54340	MADS	25.7297	0.967176	4.7335	3.902e-07	3.1529e-06	53.7501	16.0999	1.7392	3.1853e-05	0.00034041
Gh_D03G0161	AT4G36740	HB	71.5696	35.4784	1.0124	0.0026356	0.010433	74.5567	24.3641	1.6136	3.4866e-06	4.5688e-05
Gh_D03G0185	AT4G37180	G2-like	490.656	174.844	1.4886	2.94e-26	1.04e-24	151.44	48.5948	1.6399	1.1557e-11	3.0439e-10
Gh_D03G0292	AT4G37790	HB	119.282	40.9216	1.5434	5.1937e-08	4.7142e-07	25.5913	64.9018	-1.3426	0.00014587	0.0013439
Gh_D04G1369	AT5G13330	AP2-EREBP	78.3124	15.6928	2.3191	1.8336e-09	1.9758e-08	24.4507	98.1795	-2.0055	4.4807e-10	1.0045e-08
Gh_D04G1891	AT1G69120	MADS	188.348	0.837412	7.8132	8.49e-57	8.78e-55	481.307	12.8315	5.2292	1.95e-97	1.06e-94
Gh_D05G0228	AT3G24520	HSF	93.494	43.1864	1.1143	0.00063049	0.0029077	431.958	172.437	1.3248	7.15e-22	4.02e-20
Gh_D05G0352	AT1G19180	Tify	343.002	156.315	1.1338	8.1e-13	1.1939e-11	244.597	1059.45	-2.1148	8.61e-97	4.62e-94
Gh_D05G0463	AT2G19810	C3H	1805.86	801.124	1.1726	1.73e-52	1.57e-50	926.882	458.441	1.0156	3.34e-28	2.56e-26
Gh_D05G1963	AT1G46768	AP2-EREBP	244.105	58.6431	2.0575	3.65e-22	1.04e-20	40.3559	8.83989	2.1907	1.9321e-05	0.00021743
Gh_D05G1992	AT1G22130	MADS	654.28	112.303	2.5425	2.07e-73	3.18e-71	108.58	12.7578	3.0893	1.78e-18	8.1e-17
Gh_D05G2222	AT1G21910	AP2-EREBP	10.2722	34.5406	-1.7495	0.0044552	0.016576	181.872	27.9766	2.7006	6.28e-26	4.32e-24
Gh_D05G2452	AT3G54340	MADS	91.7981	11.7947	2.9603	1.82e-14	3.08e-13	41.4964	14.0918	1.5581	0.0022031	0.014267
Gh_D05G2470	AT1G75250	MYB	171.806	33.6089	2.3539	2.07e-19	4.98e-18	367.761	74.135	2.3105	3.98e-41	5.09e-39
Gh_D05G3180	AT3G12890	Orphans	13.7816	39.6361	-1.5241	0.0023596	0.0094511	16.5037	52.2669	-1.6631	5.7213e-05	0.0005776
Gh_D05G3474	AT4G27410	NAC	1063.59	302.445	1.8142	4e-69	5.7e-67	379.643	93.405	2.0231	5.77e-27	4.14e-25
Gh_D06G0184	AT4G37260	MYB	1828.26	810.648	1.1733	1.76e-53	1.66e-51	1213.65	490.094	1.3082	3.4e-53	6.78e-51
Gh_D06G0289	AT5G65310	HB	255.126	554.987	-1.1212	1.13e-18	2.58e-17	260.736	83.856	1.6366	9.39e-19	4.36e-17
Gh_D06G0886	AT3G18100	MYB	57.4527	123.16	-1.1001	2.8193e-05	0.00017024	103.551	40.5132	1.3539	1.5835e-06	2.2089e-05
Gh_D06G1197	AT5G50080	AP2-EREBP	264.512	45.8812	2.5274	3.72e-31	1.68e-29	59.8449	15.0467	1.9918	1.0669e-06	1.5303e-05
Gh_D06G1546	AT3G12910	NAC	20.8597	4.57635	2.1885	0.0033303	0.01282	2.09307	22.3805	-3.4185	3.8905e-05	0.000409
Gh_D07G0362	AT1G15360	AP2-EREBP	24.862	67.0881	-1.4321	0.00012537	0.00067199	0	10.7743	Inf	0.00054646	0.0042912
Gh_D07G0469	AT5G61850	LFY	243.434	88.7138	1.4563	4.0912e-05	0.00024023	197.597	67.3524	1.5528	1.07e-13	3.416e-12
Gh_D07G0505	AT2G03340	WRKY	107.827	10.8275	3.3159	7.19e-19	1.68e-17	28.8175	5.80313	2.312	0.00023287	0.002032
Gh_D07G0780	AT5G60910	MADS	133.163	60.9607	1.1272	9.6937e-06	6.3592e-05	235.988	97.1404	1.2806	4.49e-12	1.2256e-10
Gh_D07G1303	AT1G09530	bHLH	534.977	1293.23	-1.2734	6.6e-46	5e-44	339.708	753.194	-1.1487	3.36e-28	2.57e-26
Gh_D07G1488	AT3G23240	AP2-EREBP	29.1996	2.642	3.4662	3.8213e-06	2.6792e-05	16.2026	0.477449	5.0847	5.3632e-05	0.00054546
Gh_D07G1726	AT1G20696	HMG	755.029	348.238	1.1165	2.79e-24	8.94e-23	338.398	713.952	-1.0771	1.82e-24	1.15e-22
Gh_D07G1814	AT3G02310	MADS	58.2022	0.418706	7.119	7.01e-18	1.53e-16	49.9818	1.43235	5.1249	8.85e-14	2.83e-12
Gh_D07G2014	AT5G24590	NAC	228.746	112.917	1.0185	6.5921e-08	5.9069e-07	261.466	112.63	1.215	1.7817e-05	0.00020223
Gh_D07G2124	AT5G43700	AUX/IAA	314.335	883.557	-1.491	6.62e-43	4.61e-41	970.257	1988.89	-1.0355	2.28e-55	4.78e-53
Gh_D08G0391	AT1G22640	MYB	385.864	1042.71	-1.4342	1.29e-46	9.99e-45	534.583	239.786	1.1567	1.34e-11	3.5065e-10
Gh_D08G0665	AT5G43700	AUX/IAA	54.1404	119.976	-1.148	2.1889e-05	0.00013485	275.561	621.34	-1.173	8.96e-25	5.79e-23
Gh_D08G1112	AT2G46680	HB	191.364	25.0696	2.9323	6.89e-28	2.67e-26	127.283	4.37078	4.864	1.07e-27	8.04e-26
Gh_D08G1356	AT1G09540	MYB	58.7933	253.444	-2.1079	4.01e-23	1.21e-21	80.418	184.767	-1.2001	5.7708e-09	1.1352e-07
Gh_D08G1430	AT2G45650	MADS	40.3588	0	Inf	2e-13	3.11e-12	116.942	2.9876	5.2907	1.12e-31	9.99e-30
Gh_D08G2092	AT5G24590	NAC	107.433	44.7548	1.2633	1.1658e-05	7.5511e-05	222.416	42.093	2.4016	6.82e-27	4.88e-25
Gh_D09G0390	AT2G45650	MADS	463.388	192.507	1.2673	1.33e-19	3.24e-18	181.341	42.2405	2.102	7.77e-19	3.64e-17
Gh_D09G0401	AT5G51990	AP2-EREBP	6.62461	29.2921	-2.1446	0.0008332	0.0037419	39.2792	78.7128	-1.0028	0.0012437	0.0087459
Gh_D09G0485	AT1G25340	MYB	227.465	93.06	1.2894	6.7421e-11	8.3977e-10	48.1333	19.6387	1.2933	0.0021011	0.013706
Gh_D09G0638	AT5G49450	bZIP	83.1036	0	Inf	4.47e-27	1.66e-25	46.9927	11.3255	2.0529	9.878e-06	0.00011831
Gh_D09G1287	AT5G06250	ABI3VP1	46.747	16.2413	1.5252	0.00066253	0.0030392	24.1533	6.3789	1.9208	0.0029545	0.018264
Gh_D09G1705	AT5G52020	AP2-EREBP	26.0055	65.2835	-1.3279	0.00035842	0.0017471	81.1296	292.302	-1.8492	3.54e-19	1.69e-17
Gh_D09G2362	AT3G02310	MADS	64.8662	0	Inf	2.7e-21	7.31e-20	49.6241	5.82771	3.09	3.9997e-09	8.0641e-08
Gh_D10G0308	AT4G18960	MADS	19.6374	0	Inf	8.7212e-06	5.7654e-05	28.7573	0.502029	5.84	6.7986e-09	1.3275e-07
Gh_D10G0309	AT4G18960	MADS	36.396	0.418706	6.4417	4.5436e-11	5.7544e-10	45.1443	0	Inf	8.0522e-11	1.9662e-09
Gh_D10G0403	AT1G30135	Tify	24.7044	55.3938	-1.165	0.0037521	0.014236	4.00548	30.1426	-2.9118	0.00034045	0.0028454
Gh_D10G1011	AT5G56270	WRKY	62.3621	14.9203	2.0634	7.4989e-07	5.8309e-06	17.3394	43.3533	-1.3221	0.0023587	0.015107
Gh_D10G1743	AT3G58070	C2H2	83.3794	25.0047	1.7375	5.592e-07	4.4337e-06	23.1369	3.86875	2.5803	0.00041039	0.003338
Gh_D11G0086	AT5G52020	AP2-EREBP	119.677	295.875	-1.3058	1.49e-13	2.34e-12	214.515	1078.23	-2.3295	1.01e-111	6.8e-109
Gh_D11G0285	AT4G17980	NAC	31.9007	72.3133	-1.1807	0.00079672	0.003595	41.6734	7.86041	2.4065	4.1044e-06	5.3114e-05
Gh_D11G0400	AT2G42830	MADS	174.784	82.7221	1.0792	0.002715	0.010718	200.593	18.0097	3.4774	3.13e-37	3.51e-35
Gh_D11G0743	AT5G61430	NAC	509.661	76.3118	2.7396	8.11e-38	4.79e-36	329.916	17.7044	4.2199	2.35e-72	7.79e-70
Gh_D11G0882	AT2G45650	MADS	75.0001	4.64123	4.0143	2.08e-16	4.05e-15	101.217	2.86469	5.1429	6.31e-27	4.52e-25
Gh_D11G1052	AT2G46680	HB	688.427	298.624	1.205	1.55e-25	5.31e-24	374.557	48.3736	2.9529	1.29e-24	8.26e-23
Gh_D11G1068	AT1G01060	MYB	2432.81	9322.98	-1.9382	0	0	1120.32	192.554	2.5406	2.22e-131	2.09e-128
Gh_D11G1798	AT2G21320	Orphans	263.94	924.172	-1.808	2.22e-59	2.46e-57	183.913	67.4365	1.4474	1.8645e-11	4.8256e-10
Gh_D11G2469	AT3G04070	NAC	847.262	255.797	1.7278	1.9e-53	1.79e-51	392.931	45.9618	3.0958	1.55e-62	4.01e-60
Gh_D12G0132	AT5G64530	NAC	848.228	100.09	3.0832	1.43e-118	4.39e-116	338.696	95.034	1.8335	6.05e-28	4.58e-26
Gh_D12G0577	AT2G21320	Orphans	323.266	693.686	-1.1016	5.57e-13	8.34e-12	229.415	59.3936	1.9496	4.33e-21	2.32e-19
Gh_D12G1184	AT1G01060	MYB	1295.8	6211.72	-2.2611	0	0	691.707	81.5671	3.0841	7.09e-62	1.8e-59
Gh_D12G1185	AT1G01060	MYB	2163.26	6849.35	-1.6628	2.16e-218	2.33e-215	1501.94	619.764	1.277	9.86e-62	2.46e-59
Gh_D12G1645	AT1G26945	bHLH	40.4771	98.7688	-1.287	2.0012e-05	0.00012398	9.68615	36.4969	-1.9138	0.00088643	0.0065233
Gh_D12G1857	AT3G48360	TAZ	44.7358	7.413	2.5933	8.4012e-07	6.4888e-06	16.0256	40.6606	-1.3433	0.0027305	0.017063
Gh_D12G2088	AT4G17980	NAC	27.7996	71.4698	-1.3623	0.0001249	0.00066961	73.4198	167.122	-1.1867	4.3017e-08	7.5551e-07
Gh_D12G2226	AT4G22950	MADS	18.1586	104.56	-2.5256	4.72e-13	7.11e-12	1.97263	15.7208	-2.9945	0.0020666	0.013517
Gh_D12G2235	AT4G25490	AP2-EREBP	9.97632	37.8315	-1.923	0.00038552	0.0018667	22.4818	211.922	-3.2367	2.22e-36	2.41e-34
Gh_D12G2638	AT1G25340	MYB	195.9	38.7986	2.336	8.24e-22	2.31e-20	94.4673	30.3147	1.6398	1.1297e-07	1.8667e-06
Gh_D12G2767	AT1G69490	NAC	664.454	252.76	1.3944	5.02e-31	2.25e-29	354.661	30.4867	3.5402	6.95e-66	1.96e-63
Gh_D13G0630	AT5G11510	MYB	150.829	58.3956	1.369	1.1828e-08	1.1616e-07	25.6478	7.30922	1.811	0.0034053	0.020567
Gh_D13G0877	AT2G03710	MADS	166.148	23.2001	2.8403	1.45e-23	4.47e-22	162.018	2.43641	6.0553	2.14e-34	2.13e-32
Gh_D13G0878	AT1G69120	MADS	232.197	3.12559	6.2151	3.07e-64	3.88e-62	338.823	11.2763	4.9092	1.28e-83	5.44e-81
Gh_D13G1015	AT3G30530	bZIP	40.8124	120.807	-1.5656	3.7121e-08	3.4318e-07	19.7336	57.6909	-1.5477	5.5761e-05	0.00056426
Gh_D13G1716	AT1G69560	MYB	207.295	61.4503	1.7542	1.56e-15	2.86e-14	38.4435	80.3418	-1.0634	0.00058271	0.0045289
Gh_D13G1759	AT3G04070	NAC	346.61	89.1325	1.9593	6.09e-29	2.49e-27	61.7647	18.9401	1.7053	1.4376e-05	0.00016681
Gh_Sca004734G04	AT4G21440	MYB	21.5891	59.9052	-1.4724	0.0002333	0.0011824	14.5876	89.3642	-2.615	8.27e-13	2.4276e-11
Gh_Sca007246G01	AT5G20240	MADS	85.0553	0	Inf	1.23e-27	4.71e-26	65.1643	0.477449	7.0926	3.89e-15	1.4e-13

## Sheet: Supplementary Data 4
Supplementary Data S4 The 58 cultivars bred in Xinjiang Province
Name	the typle of fruit branches
Junhai1	determinate growth habit with cl trait
Xinhai2	indeterminate growth habit
Xinhai3	determinate growth habit with cl trait
Xinhai4	determinate growth habit with cl trait
Xinhai5	indeterminate growth habit
Xinhai6	determinate growth habit with cl trait
Xinhai7	determinate growth habit with cl trait
Xinhai8	determinate growth habit with cl trait
Xinhai9	determinate growth habit with cl trait
Xinhai10	determinate growth habit with cl trait
Xinhai11	determinate growth habit with cl trait
Xinhai12	determinate growth habit with cl trait
Xinhai13	determinate growth habit with cl trait
Xinhai14	determinate growth habit with cl trait
Xinhai15	determinate growth habit with cl trait
Xinhai16	determinate growth habit with cl trait
Xinhai17	determinate growth habit with cl trait
Xinhai18	determinate growth habit with cl trait
Xinhai19	indeterminate growth habit
Xinhai20	determinate growth habit with cl trait
Xinhai21	determinate growth habit with cl trait
Xinhai22	determinate growth habit with cl trait
Xinhai23	determinate growth habit with cl trait
Xinhai24	determinate growth habit with cl trait
Xinhai25	determinate growth habit with cl trait
Xinhai26	determinate growth habit with cl trait
Xinhai27	determinate growth habit with cl trait
Xinhai28	determinate growth habit with cl trait
Xinhai29	determinate growth habit with cl trait
Xinhai30	determinate growth habit with cl trait
Xinhai31	determinate growth habit with cl trait
Xinhai32	determinate growth habit with cl trait
Xinhai33	determinate growth habit with cl trait
Xinhai34	determinate growth habit with cl trait
Xinhai35	determinate growth habit with cl trait
Xinhai36	determinate growth habit with cl trait
Xinhai37	determinate growth habit with cl trait
Xinhai38	determinate growth habit with cl trait
Xinhai39	determinate growth habit with cl trait
Xinhai40	determinate growth habit with cl trait
Xinhai41	determinate growth habit with cl trait
Xinhai42	determinate growth habit with cl trait
Xinhai43	determinate growth habit with cl trait
Xinhai44	determinate growth habit with cl trait
Xinhai45	determinate growth habit with cl trait
Xinhai46	determinate growth habit with cl trait
Xinhai47	determinate growth habit with cl trait
Xinhai48	determinate growth habit with cl trait
Xinhai49	determinate growth habit with cl trait
Xinhai50	determinate growth habit with cl trait
Xinhai51	determinate growth habit with cl trait
Xinhai52	determinate growth habit with cl trait
Xinhai53	determinate growth habit with cl trait
Xinhai54	determinate growth habit with cl trait
Xinhai55	determinate growth habit with cl trait
Xinhai56	determinate growth habit with cl trait
Xinhai57	determinate growth habit with cl trait

## Sheet: Supplementary Data 5
Supplementary Data S5 The information of the expermental material of G. barbadense
Name	Origin	Typle of the fruit branch
149-B	Tajikistan	determinate growth habit with cluster fruiting (cl)
153-B	Tajikistan	determinate growth habit with cluster fruiting (cl)
24-B	Tajikistan	determinate growth habit with cluster fruiting (cl)
56-B	Tajikistan	determinate growth habit with cluster fruiting (cl)
67-B	Tajikistan	determinate growth habit with cluster fruiting (cl)
9101-B	Tajikistan	determinate growth habit with cluster fruiting (cl)
9103-B	Tajikistan	determinate growth habit with cluster fruiting (cl)
TJK-1	Tajikistan	determinate growth habit with cluster fruiting (cl)
TJK-2	Tajikistan	determinate growth habit with cluster fruiting (cl)
504-И	Turkmenistan	determinate growth habit with cluster fruiting (cl)
9983-И	Turkmenistan	determinate growth habit with cluster fruiting (cl)
9943-13N	Turkmenistan	determinate growth habit with cluster fruiting (cl)
C-605	Uzbekistan	determinate growth habit with cluster fruiting (cl)
Su1241	Uzbekistan	determinate growth habit with cluster fruiting (cl)
Su1243	Uzbekistan	determinate growth habit with cluster fruiting (cl)
Su1248	Uzbekistan	determinate growth habit with cluster fruiting (cl)
Su2525	Uzbekistan	determinate growth habit with cluster fruiting (cl)
Su4294	Uzbekistan	determinate growth habit with cluster fruiting (cl)
SU11	Uzbekistan	determinate growth habit with cluster fruiting (cl)
SU K12	Uzbekistan	determinate growth habit with cluster fruiting (cl)
BZ1120	Xinjiang Province of China	determinate growth habit with cluster fruiting (cl)
BZ1248	Xinjiang Province of China	determinate growth habit with cluster fruiting (cl)
BZ266	Xinjiang Province of China	determinate growth habit with cluster fruiting (cl)
BZ3410	Xinjiang Province of China	determinate growth habit with cluster fruiting (cl)
BZ4021	Xinjiang Province of China	determinate growth habit with cluster fruiting (cl)
Hai92-137	Xinjiang Province of China	determinate growth habit with cluster fruiting (cl)
Junhai1	Xinjiang Province of China	determinate growth habit with cluster fruiting (cl)
KKv79669	Xinjiang Province of China	determinate growth habit with cluster fruiting (cl)
Ku8642	Xinjiang Province of China	determinate growth habit with cluster fruiting (cl)
KuH8660	Xinjiang Province of China	determinate growth habit with cluster fruiting (cl)
Ta09-234	Xinjiang Province of China	determinate growth habit with cluster fruiting (cl)
Ta10-280	Xinjiang Province of China	determinate growth habit with cluster fruiting (cl)
Xinhai10	Xinjiang Province of China	determinate growth habit with cluster fruiting (cl)
Xinhai11	Xinjiang Province of China	determinate growth habit with cluster fruiting (cl)
Xinhai12	Xinjiang Province of China	determinate growth habit with cluster fruiting (cl)
Xinhai13	Xinjiang Province of China	determinate growth habit with cluster fruiting (cl)
Xinhai14	Xinjiang Province of China	determinate growth habit with cluster fruiting (cl)
Xinhai15	Xinjiang Province of China	determinate growth habit with cluster fruiting (cl)
Xinhai17	Xinjiang Province of China	determinate growth habit with cluster fruiting (cl)
Xinhai18	Xinjiang Province of China	determinate growth habit with cluster fruiting (cl)
Xinhai20	Xinjiang Province of China	determinate growth habit with cluster fruiting (cl)
Xinhai21	Xinjiang Province of China	determinate growth habit with cluster fruiting (cl)
Xinhai22	Xinjiang Province of China	determinate growth habit with cluster fruiting (cl)
Xinhai23	Xinjiang Province of China	determinate growth habit with cluster fruiting (cl)
Xinhai24	Xinjiang Province of China	determinate growth habit with cluster fruiting (cl)
Xinhai3	Xinjiang Province of China	determinate growth habit with cluster fruiting (cl)
Xinhai6	Xinjiang Province of China	determinate growth habit with cluster fruiting (cl)
Xinhai8	Xinjiang Province of China	determinate growth habit with cluster fruiting (cl)
Xinhai9	Xinjiang Province of China	determinate growth habit with cluster fruiting (cl)
Tuhai1	Xinjiang Province of China	determinate growth habit with cluster fruiting (cl)
Xinhai5	Xinjiang Province of China	determinate growth habit with cluster fruiting (cl)
Damdara	Egypt	indeterminate growth habit
Giza1	Egypt	indeterminate growth habit
Giza2	Egypt	indeterminate growth habit
Giza70	Egypt	indeterminate growth habit
Giza76	Egypt	indeterminate growth habit
Giza77	Egypt	indeterminate growth habit
Giza80	Egypt	indeterminate growth habit
Giza81	Egypt	indeterminate growth habit
Giza85	Egypt	indeterminate growth habit
Coibalt	America	indeterminate growth habit
DP340	America	indeterminate growth habit
DP353	America	indeterminate growth habit
Pima calbolf	America	indeterminate growth habit
Pima5	America	indeterminate growth habit
Pima90-53	America	indeterminate growth habit
Pima86-6-17	America	indeterminate growth habit
Pima3	America	indeterminate growth habit
Pima5-1	America	indeterminate growth habit
Pima6	America	indeterminate growth habit
Pima67	America	indeterminate growth habit
Pima79-103	America	indeterminate growth habit
Pima S2	America	indeterminate growth habit
Pima S3	America	indeterminate growth habit
B9101	America	indeterminate growth habit
B94-1	America	indeterminate growth habit
PYE	America	indeterminate growth habit
B54	Tajikistan	indeterminate growth habit
B89101	Tajikistan	indeterminate growth habit
Ashi	Turkmenistan	indeterminate growth habit
7871-13N	Turkmenistan	indeterminate growth habit
Ashi 91	Uzbekistan	indeterminate growth habit
Barl	Uzbekistan	indeterminate growth habit
C-352	Uzbekistan	indeterminate growth habit
Su2283	Uzbekistan	indeterminate growth habit
Su2515	Uzbekistan	indeterminate growth habit
Su3965	Uzbekistan	indeterminate growth habit
Su4314	Uzbekistan	indeterminate growth habit
Su4394	Uzbekistan	indeterminate growth habit
Su4396	Uzbekistan	indeterminate growth habit
Su4398	Uzbekistan	indeterminate growth habit
ZY cotton	Uzbekistan	indeterminate growth habit
